# Supplementary material
Source: Royal Society of Chemistry journal article supplement (doi:10.1039/d6md00217j)

## Supplementary Materials

### Bicyclic Monoterpenoid-Based Orthopoxvirus Inhibitors: Design, Synthesis, and Biological Assessment of a Novel Amide Series

Serafim A. Tishchenko<sup>a,b</sup>, Anastasiya S. Sokolova<sup>a,\*</sup>, Valeriya V. Samsonova<sup>a</sup>, Julia G. Pushkareva<sup>a,b</sup>, Nikolay I. Bormotov<sup>c</sup>, Ivan A. Moskalev<sup>d</sup>, Daria. E. Solomina<sup>a,b</sup>, Artem D. Rogachev<sup>a</sup>, Alina.V. Fatyanova<sup>b</sup>, Sophia S. Borisevich<sup>d</sup>, Olga I. Yarovaya<sup>a</sup>, Olga A. Serova<sup>c</sup>, Alena S. Ovchinnikova<sup>c</sup>, Alexander A. Sergeev<sup>c</sup>, Larisa N. Shishkina<sup>c</sup>, Artemiy A. Sergeev<sup>c</sup>, Alexander P. Agafonov<sup>c</sup>, Nariman F. Salakhutdinov<sup>a</sup>

[a] *N.N. Vorozhtsov Novosibirsk Institute of Organic Chemistry, Siberian Branch of Russian Academy of Sciences (SB RAS), Novosibirsk 630090, Russian Federation*

[b] *Novosibirsk State University, Novosibirsk 630090, Russian Federation*

[c] *State Research Center of Virology and Biotechnology VECTOR, Koltsovo, Novosibirsk Region 630559 (Russia)*

[d] *SRF "SKIF", Koltsovo 630559, Russian Federation*

\*Correspondence: Anastasiya S. Sokolova, E-mail: [asokolova@nioch.nsc.ru](mailto:asokolova@nioch.nsc.ru).

### Table of Contents

|                                                                           |    |
|---------------------------------------------------------------------------|----|
| 1. Computational details.....                                             | 2  |
| 3. Whole blood sample preparation for quantification of compound 13d..... | 14 |
| 4. Stability study of compound 13d in whole murine blood.....             | 15 |
| 5. Stock solutions and calibration solutions.....                         | 15 |
| 6. Experiments on animals.....                                            | 16 |
| 7. NMR <sup>1</sup> H and <sup>13</sup> C spectra.....                    | 17 |

## 1. Computational details

**Table SM1.** Phase Screen Score values for molecules calculated relative to the reference agent **3b** and the set of pharmacophoric features: A – hydrogen-bond acceptor (red circle), D – hydrogen-bond donor (blue circle), H – hydrophobic feature (green circle), R – aromatic ring (yellow circle). The numbering corresponds to the set of pharmacophores of molecule **3b** (Figure 1).

| Structure ID | Phase Screen Score           | pIC <sub>50</sub><br>(VACV) | Matching features of ligands<br>A1.A2.D3.H4.H5.H6.H7.H8.H9.R10                        |
|--------------|------------------------------|-----------------------------|---------------------------------------------------------------------------------------|
| 13d          | 1.700                        | 6.49                        |    |
| 15b          | 1.971 (RRRS)<br>1.711 (SSSR) | 6.34                        |    |
| 15c          | 1.836 (RRRS)<br>1.628 (SSSR) | 6.22                        |    |
| 17b          | 0.221                        | 6.14                        |    |
| 15f          | 1.397 (SSSR)<br>1.220 (RRRS) | 6.13                        |    |
| 3b           | 3.000                        | 6.05                        |    |
| 17d          | 1.322                        | 5.96                        |    |
| 15e          | 1.715 (RRRS)<br>1.666 (RRRS) | 5.84                        |    |
| 19k          | 1.939                        | 5.83                        |  |
| 12d          | 1.451                        | 5.66                        |  |
| 15d          | 1.786 (RRRS)<br>1.715 (SSSR) | 5.63                        |  |
| 13b          | 1.721                        | 5.63                        |  |
| 13c          | 1.605                        | 5.57                        |  |
| 15a          | 1.701 (RRRS)<br>1.596 (SSSR) | 5.53                        |  |
| 17h          | 1.673                        | 5.52                        |  |

|     |       |      |                                                                                       |
|-----|-------|------|---------------------------------------------------------------------------------------|
| 17c | 1.508 | 5.52 |    |
| 19n | 1.978 | 5.44 |    |
| 19m | 1.926 | 5.42 |    |
| 13a | 1.719 | 5.29 |    |
| 13h | 1.626 | 5.27 |    |
| 12b | 1.461 | 5.26 |    |
| 17g | 1.611 | 5.25 |    |
| 17e | 1.322 | 5.21 |    |
| 13g | 1.518 | 5.10 |    |
| 17a | 0.238 | 5.04 |    |
| 12h | 1.381 | 5.01 |    |
| 12a | 1.460 | 4.98 |    |
| 12g | 1.005 | 4.97 |    |
| 11d | 1.636 | 4.96 |    |
| 11c | 1.583 | 4.94 |  |
| 12c | 1.413 | 4.94 |  |
| 17f | 1.192 | 4.90 |  |
| 19g | 1.943 | 4.88 |  |
| 21a | 1.557 | 4.80 |  |
| 20a | 1.568 | 4.79 |  |
| 11a | 1.670 | 4.72 |  |
| 19i | 1.965 | 4.66 |  |

|     |       |      |  |
|-----|-------|------|--|
| 11b | 1.670 | 4.65 |  |
| 13g | 1.429 | 4.48 |  |
| 20b | 1.437 | 4.34 |  |
| 12e | 1.402 | 3.62 |  |
| 11e | 1.597 | 3.48 |  |
| 19h | 1.814 | n/a  |  |
| 13e | 1.615 | n/a  |  |
| 20d | 1.606 | n/a  |  |
| 13f | 1.606 | n/a  |  |
| 11f | 1.594 | n/a  |  |
| 20e | 1.565 | n/a  |  |
| 21c | 1.565 | n/a  |  |
| 20c | 1.565 | n/a  |  |
| 21b | 1.450 | n/a  |  |
| 12f | 1.406 | n/a  |  |
| 21d | 1.369 | n/a  |  |

**Table SM2.** Molecular docking results for phospholipase domain.

| ID  | pIC50 (VACV) | Docking score | $\Delta G_{\text{binds}}$ , kcal/mol | Interaction with residues |                                                                                   | Molecular docking protocol                                           |
|-----|--------------|---------------|--------------------------------------|---------------------------|-----------------------------------------------------------------------------------|----------------------------------------------------------------------|
|     |              |               |                                      | H-bonds                   | Other interactions                                                                |                                                                      |
| 3b  | 6.02         | -7.351        | -45.74                               | Ser135, Asn312, Ser140    | Gln310 – halogen bond<br>Phe52, Leu118 – hydrophobic with hydrocarbon ligand cage | Redocking using representative frame of MD simulation (RMSD = 0.210) |
| 11c | 4.78         | -6.712        | -39.46                               | Asn133, Asn278            | Leu118, Cys120 – hydrophobic with hydrocarbon ligand cage                         | flexible docking without ligand positional constraints               |
| 12a | 4.98         | -7.001        | -41.02                               | none                      | Leu118, Cys120 –                                                                  | positional constraints regarding                                     |

|     |      |        |        |        |                               |                                                                          |                                                                                         |                                                                                         |
|-----|------|--------|--------|--------|-------------------------------|--------------------------------------------------------------------------|-----------------------------------------------------------------------------------------|-----------------------------------------------------------------------------------------|
|     |      |        |        |        |                               | hydrophobic with hydrocarbon ligand cage                                 | the reference ligand with tolerance 2Å<br>RMSD = 1.596                                  |                                                                                         |
| 12b | 5.26 | -5.868 | -43.32 |        | Ser135                        | Phe52, Leu118, Cys120 – hydrophobic with hydrocarbon ligand cage         | positional constraints regarding the reference ligand with tolerance 2Å<br>RMSD = 0.922 |                                                                                         |
| 12c | 4.94 | -5.230 | -39.44 |        | Ser135, Asn133, Ser140, Asn55 | Arg89 – salt bridge, Cys52 – hydrophobic with aromatic ring              | positional constraints regarding the reference ligand with tolerance 2Å<br>RMSD = 0.795 |                                                                                         |
| 12d | 5.66 | -6.173 | -43.13 |        | Ser135, Ser140                | Ile144 – hydrophobic with – CF <sub>3</sub> group                        | positional constraints regarding the reference ligand with tolerance 2Å<br>RMSD = 1.717 |                                                                                         |
| 12h | 5.01 | -6.615 | -36.78 |        | Asn133, Asn312                | Phe52, Leu118, Cys120 – hydrophobic with hydrocarbon ligand cage         | flexible docking without ligand positional constraints                                  |                                                                                         |
| 13a | 5.29 | -6.386 | -40.06 |        | none                          | Ala134 – hydrophobic with hydrocarbon ligand cage                        |                                                                                         |                                                                                         |
| 13c | 5.57 | -5.196 | -43.17 |        | Ser135                        | Phe52, Leu239, Cys120, Leu118 – hydrophobic with hydrocarbon ligand cage | positional constraints regarding the reference ligand with tolerance 2Å<br>RMSD = 0.768 |                                                                                         |
| 13d | 6.49 | -6.207 | -47.50 |        | Ser135                        | Phe52, Leu239, Cys120, Leu118 – hydrophobic with hydrocarbon ligand cage | positional constraints regarding the reference ligand with tolerance 2Å<br>RMSD = 0.913 |                                                                                         |
| 13g | 5.10 | -6.567 | -40.07 |        | Ser327                        | none                                                                     | flexible docking without ligand positional constraints                                  |                                                                                         |
| 13h | 5.27 | -6.055 | -41.17 |        | Ser135                        | Cys53, Phe52, Leu239 – hydrophobic with hydrocarbon ligand cage          | positional constraints regarding the reference ligand with tolerance 2Å<br>RMSD = 1.605 |                                                                                         |
| 15a | RRRS | 5.42   | -7.111 | -41.36 | -41.36<br>Median values       | Ser135                                                                   | Ile144 – hydrophobic with chlorine atoms                                                | positional constraints regarding the reference ligand with tolerance 2Å<br>RMSD = 0.945 |
|     | RRRS |        | -6.159 | -36.23 |                               | Ser135                                                                   | Ile144 – hydrophobic with chlorine atoms                                                | RMSD = 0.503                                                                            |

|     | RSSS         |               | -6.159                              | -41.55                    |                | Ser135                                                                  | Ile144 – hydrophobic with chlorine atoms<br>Cys120, Phe52, Leu118, Leu239 – hydrophobic with hydrocarbon ligand cage | RMSD = 0.867                                           |
|-----|--------------|---------------|-------------------------------------|---------------------------|----------------|-------------------------------------------------------------------------|----------------------------------------------------------------------------------------------------------------------|--------------------------------------------------------|
|     | RSSS         |               | -6.550                              | -41.69                    |                | Ser135                                                                  | Ile144 – hydrophobic with chlorine atoms<br>Cys120, Leu118, Leu239 – hydrophobic with hydrocarbon ligand cage        | RMSD = 0.282                                           |
| 15b | RRRS         | 5.92          | -6.558                              | -42.84                    | -43.21         | none                                                                    | Tyr335, Leu118, Cys120, Phe52 – hydrophobic with aromatic ring and bromine atom                                      | flexible docking without ligand positional constraints |
|     | SSSR         |               | -6.724                              | -43.58                    |                | Ser135                                                                  | Cys120, Phe52 Leu118, Leu239 – hydrophobic with hydrocarbon ligand cage                                              |                                                        |
| 15d | SSSR         | 5.32          | -6.983                              | -41.11                    | -43.02         | Ser135                                                                  | Cys120, Phe52 Leu118, Leu239 – hydrophobic with hydrocarbon ligand cage                                              | flexible docking without ligand positional constraints |
|     | RRRS         |               | -6.468                              | -44.93                    |                | Ser135                                                                  | Cys120, Phe52 Leu118, Leu239 – hydrophobic with hydrocarbon ligand cage                                              |                                                        |
| 15e | SSSR         | 5.34          | -6.671                              | -38.27                    | -39.58         | Ser135                                                                  | Leu118, Leu239 – hydrophobic with hydrocarbon ligand cage                                                            | flexible docking without ligand positional constraints |
|     | RRRS         |               | -7.849                              | -40.88                    |                | Ser135, Ser140                                                          | Cys120, Phe52 Leu118, Leu239 – hydrophobic with hydrocarbon ligand cage                                              |                                                        |
| 15f | SSSR         | 5.73          | -7.812                              | -41.57                    | -41.73         | Ser135                                                                  | Cys120, Phe52 Leu118, Leu239 – hydrophobic with hydrocarbon ligand cage                                              | flexible docking without ligand positional constraints |
|     | RRRS         |               | -7.845                              | -41.90                    |                | Ser135                                                                  | Trp279, Ile144 – hydrophobic with cyclohexane fragment                                                               |                                                        |
| 20b |              | 4.83          | -5,754                              | -36.38                    | Ser327, Asn133 | Cys120, Phe52 Leu118, Leu239 – hydrophobic with hydrocarbon ligand cage | positional constraints regarding the reference ligand with tolerance 2Å<br>RMSD = 1.453                              |                                                        |
| ID  | pIC50 (VACV) | Docking score | $\Delta G_{\text{bind}}$ , kcal/mol | Interaction with residues |                |                                                                         |                                                                                                                      | Molecular docking protocol                             |
|     |              |               |                                     | H-bonds                   |                | Other interactions                                                      |                                                                                                                      |                                                        |

|     |      |         |        |                |                                                                                                                  |                                                                                                                                |
|-----|------|---------|--------|----------------|------------------------------------------------------------------------------------------------------------------|--------------------------------------------------------------------------------------------------------------------------------|
| 3b  | 6.02 | -10.793 | -80.19 | Ser292         | Ala288, Tyr285, Tyr253, Leu296, Ala295, Leu293 – hydrophobic with hydrocarbon ligand cage                        | Redocking using representative frame of MD simulation, positional constraints regarding the reference ligand with tolerance 5Å |
| 11c | 4.78 | -10.069 | -63.17 | Tyr258         | pi-pi stacking Tyr258, Ala288, Tyr285, Tyr253, Leu296, Ala295, Leu293 – hydrophobic with hydrocarbon ligand cage | Redocking using representative frame of MD simulation, positional constraints regarding the reference ligand with tolerance 5Å |
| 12a | 4.98 | -9.822  | -69.51 | Tyr258, Ser292 | pi-pi stacking Tyr258, Ala288, Tyr285, Tyr253, Leu296, Ala295, Leu293 – hydrophobic with hydrocarbon ligand cage | Redocking using representative frame of MD simulation, positional constraints regarding the reference ligand with tolerance 5Å |
| 12b | 5.26 | -9.306  | -54.02 | Tyr258         | pi-pi stacking Tyr258, Ala288, Tyr285, Tyr253, Leu296, Ala295, Leu293 – hydrophobic with hydrocarbon ligand cage | Redocking using representative frame of MD simulation, positional constraints regarding the reference ligand with tolerance 5Å |
| 12c | 4.94 | -10.674 | -67.24 | Tyr258         | pi-pi stacking Tyr258, Ala288, Tyr285, Tyr253, Leu296, Ala295, Leu293 – hydrophobic with hydrocarbon ligand cage | Redocking using representative frame of MD simulation, positional constraints regarding the reference ligand with tolerance 5Å |
| 12d | 5.66 | -11.368 | -56.17 | Tyr258         | pi-pi stacking Tyr258, Ala288, Tyr285, Tyr253, Leu296, Ala295, Leu293 – hydrophobic with hydrocarbon ligand cage | Redocking using representative frame of MD simulation, positional constraints regarding the reference ligand with tolerance 5Å |
| 12h | 5.01 | -10.605 | -53.58 | Tyr258         | Ala288, Tyr285, Tyr253, Leu296, Ala295, Leu293 – hydrophobic with hydrocarbon ligand cage                        | Redocking using representative frame of MD simulation, positional constraints regarding the reference ligand with tolerance 5Å |
| 13a | 5.29 | -9.719  | -61.96 | Tyr258         | Ala288, Tyr285, Tyr253, Leu296, Ala295, Leu293 – hydrophobic with hydrocarbon ligand cage                        |                                                                                                                                |
| 13c | 5.57 | -9.561  | -58.73 | Tyr258         | pi-pi stacking Tyr258,                                                                                           | Redocking using representative                                                                                                 |

|     |      |         |         |        |        |                                                                                                                            |                                                                                                                                |
|-----|------|---------|---------|--------|--------|----------------------------------------------------------------------------------------------------------------------------|--------------------------------------------------------------------------------------------------------------------------------|
|     |      |         |         |        |        | Ala288, Tyr285, Tyr253, Leu296, Ala295, Leu293 – hydrophobic with hydrocarbon ligand cage                                  | frame of MD simulation, positional constraints regarding the reference ligand with tolerance 5Å                                |
| 13d | 6.49 | -11.065 | -63.73  |        |        | Tyr258<br>pi-pi stacking Tyr258, Ala288, Tyr285, Tyr253, Leu296, Ala295, Leu293 – hydrophobic with hydrocarbon ligand cage | Redocking using representative frame of MD simulation, positional constraints regarding the reference ligand with tolerance 5Å |
| 13g | 5.10 | -9.054  | -57.00  |        |        | Tyr258<br>Ala288, Tyr285, Tyr253, Leu296, Ala295, Leu293 – hydrophobic with hydrocarbon ligand cage                        | Redocking using representative frame of MD simulation, positional constraints regarding the reference ligand with tolerance 5Å |
| 13h | 5.27 | -10.437 | -55.85  |        |        | Tyr258<br>Ala288, Tyr285, Tyr253, Leu296, Ala295, Leu293 – hydrophobic with hydrocarbon ligand cage                        | Redocking using representative frame of MD simulation, positional constraints regarding the reference ligand with tolerance 5Å |
| 15a | RRRS | 5.42    | -9.795  | -64.87 | -65.41 | Ser292<br>Ala288, Tyr285, Tyr253, Leu296, Ala295, Leu293 – hydrophobic with hydrocarbon ligand cage                        | Redocking using representative frame of MD simulation, positional constraints regarding the reference ligand with tolerance 5Å |
|     | RSSS |         | -10.178 | -65.95 |        |                                                                                                                            |                                                                                                                                |
| 15b | RRRS | 5.92    | -9.977  | -69.44 | -66.65 | Tyr258, Ser292<br>Ala288, Tyr285, Tyr253, Leu296, Ala295, Leu293 – hydrophobic with hydrocarbon ligand cage                | Redocking using representative frame of MD simulation, positional constraints regarding the reference ligand with tolerance 5Å |
|     | SSSR |         | -9.403  | -63.85 |        |                                                                                                                            |                                                                                                                                |
| 15d | SSSR | 5.32    | -11.373 | -69.57 | -67.69 | Tyr258<br>Ala288, Tyr285, Tyr253, Leu296, Ala295, Leu293 – hydrophobic with                                                | Redocking using representative frame of MD simulation, positional constraints regarding                                        |

|     |      |      |         |        |        |                |                                                                                                                                 |                                                                                                                                            |
|-----|------|------|---------|--------|--------|----------------|---------------------------------------------------------------------------------------------------------------------------------|--------------------------------------------------------------------------------------------------------------------------------------------|
|     | RRRS |      | -11.386 | -65.81 |        | Tyr258, Ser292 | hydrocarbon ligand cage<br>Ala288, Tyr285, Tyr253,<br>Leu296, Ala295, Leu293 –<br>hydrophobic with<br>hydrocarbon ligand cage   | the reference ligand with<br>tolerance 5Å                                                                                                  |
| 15e | SSSR | 5.34 | -9.638  | -68.10 | -65.24 | Tyr258, Ser292 | Ala288, Tyr285, Tyr253,<br>Leu296, Ala295, Leu293 –<br>hydrophobic with<br>hydrocarbon ligand cage                              | Redocking using representative<br>frame of MD simulation,<br>positional constraints regarding<br>the reference ligand with<br>tolerance 5Å |
|     | RRRS |      | -8.916  | -62.38 |        | Tyr258, Ser292 | Ala288, Tyr285, Tyr253,<br>Leu296, Ala295, Leu293 –<br>hydrophobic with<br>hydrocarbon ligand cage                              |                                                                                                                                            |
| 15f | SSSR | 5.73 | -9.972  | -57.55 | -64.24 | Tyr258         | Ala288, Tyr285, Tyr253,<br>Leu296, Ala295, Leu293 –<br>hydrophobic with<br>hydrocarbon ligand cage                              | Redocking using representative<br>frame of MD simulation,<br>positional constraints regarding<br>the reference ligand with<br>tolerance 5Å |
|     | RRRS |      | -9.548  | -70.93 |        | Tyr258, Ser292 | Ala288, Tyr285, Tyr253,<br>Leu296, Ala295, Leu293 –<br>hydrophobic with<br>hydrocarbon ligand cage                              |                                                                                                                                            |
| 20b |      | 4.83 | -9.457  | -49.27 |        | Tyr258         | halogen bond with Tyr289,<br>Ala288, Tyr285, Tyr253,<br>Leu296, Ala295, Leu293 –<br>hydrophobic with<br>hydrocarbon ligand cage | Redocking using representative<br>frame of MD simulation,<br>positional constraints regarding<br>the reference ligand with<br>tolerance 5Å |

**Table SM3.** Molecular docking results for homodimer.

| ID  | pIC <sub>50</sub><br>(VACV) | Docking score | $\Delta G_{\text{bind}}$ , kcal/mol | Interaction with residues |                                                                                                                  | Molecular docking protocol                                                                                                     |
|-----|-----------------------------|---------------|-------------------------------------|---------------------------|------------------------------------------------------------------------------------------------------------------|--------------------------------------------------------------------------------------------------------------------------------|
|     |                             |               |                                     | H-bonds                   | Other interactions                                                                                               |                                                                                                                                |
| 3b  | 6.02                        | -10.793       | -80.19                              | Ser292                    | Ala288, Tyr285, Tyr253, Leu296, Ala295, Leu293 – hydrophobic with hydrocarbon ligand cage                        | Redocking using representative frame of MD simulation, positional constraints regarding the reference ligand with tolerance 5Å |
| 11c | 4.78                        | -10.069       | -63.17                              | Tyr258                    | pi-pi stacking Tyr258, Ala288, Tyr285, Tyr253, Leu296, Ala295, Leu293 – hydrophobic with hydrocarbon ligand cage | Redocking using representative frame of MD simulation, positional constraints regarding the reference ligand with tolerance 5Å |
| 12a | 4.98                        | -9.822        | -69.51                              | Tyr258, Ser292            | pi-pi stacking Tyr258, Ala288, Tyr285, Tyr253, Leu296, Ala295, Leu293 – hydrophobic with hydrocarbon ligand cage | Redocking using representative frame of MD simulation, positional constraints regarding the reference ligand with tolerance 5Å |
| 12b | 5.26                        | -9.306        | -54.02                              | Tyr258                    | pi-pi stacking Tyr258, Ala288, Tyr285, Tyr253, Leu296, Ala295, Leu293 – hydrophobic with hydrocarbon ligand cage | Redocking using representative frame of MD simulation, positional constraints regarding the reference ligand with tolerance 5Å |
| 12c | 4.94                        | -10.674       | -67.24                              | Tyr258                    | pi-pi stacking Tyr258, Ala288, Tyr285, Tyr253, Leu296, Ala295, Leu293 – hydrophobic with hydrocarbon ligand cage | Redocking using representative frame of MD simulation, positional constraints regarding the reference ligand with tolerance 5Å |
| 12d | 5.66                        | -11.368       | -56.17                              | Tyr258                    | pi-pi stacking Tyr258, Ala288, Tyr285, Tyr253, Leu296, Ala295, Leu293 – hydrophobic with hydrocarbon ligand cage | Redocking using representative frame of MD simulation, positional constraints regarding the reference ligand with tolerance 5Å |
| 12h | 5.01                        | -10.605       | -53.58                              | Tyr258                    | Ala288, Tyr285, Tyr253, Leu296, Ala295, Leu293 – hydrophobic with hydrocarbon ligand cage                        | Redocking using representative frame of MD simulation, positional constraints regarding the reference ligand with              |

|     |      |      |         |  |        |                |                                                                                                                  |                                                                                                                                |
|-----|------|------|---------|--|--------|----------------|------------------------------------------------------------------------------------------------------------------|--------------------------------------------------------------------------------------------------------------------------------|
| 13a |      | 5.29 | -9.719  |  | -61.96 | Tyr258         | Ala288, Tyr285, Tyr253, Leu296, Ala295, Leu293 – hydrophobic with hydrocarbon ligand cage                        | tolerance 5Å                                                                                                                   |
| 13c |      | 5.57 | -9.561  |  | -58.73 | Tyr258         | pi-pi stacking Tyr258, Ala288, Tyr285, Tyr253, Leu296, Ala295, Leu293 – hydrophobic with hydrocarbon ligand cage | Redocking using representative frame of MD simulation, positional constraints regarding the reference ligand with tolerance 5Å |
| 13d |      | 6.49 | -11.065 |  | -63.73 | Tyr258         | pi-pi stacking Tyr258, Ala288, Tyr285, Tyr253, Leu296, Ala295, Leu293 – hydrophobic with hydrocarbon ligand cage | Redocking using representative frame of MD simulation, positional constraints regarding the reference ligand with tolerance 5Å |
| 13g |      | 5.10 | -9.054  |  | -57.00 | Tyr258         | Ala288, Tyr285, Tyr253, Leu296, Ala295, Leu293 – hydrophobic with hydrocarbon ligand cage                        | Redocking using representative frame of MD simulation, positional constraints regarding the reference ligand with tolerance 5Å |
| 13h |      | 5.27 | -10.437 |  | -55.85 | Tyr258         | Ala288, Tyr285, Tyr253, Leu296, Ala295, Leu293 – hydrophobic with hydrocarbon ligand cage                        | Redocking using representative frame of MD simulation, positional constraints regarding the reference ligand with tolerance 5Å |
| 15a | RRRS | 5.42 | -9.795  |  | -64.87 | Ser292         | Ala288, Tyr285, Tyr253, Leu296, Ala295, Leu293 – hydrophobic with hydrocarbon ligand cage                        | Redocking using representative frame of MD simulation, positional constraints regarding the reference ligand with tolerance 5Å |
|     | RSSS |      | -10.178 |  | -65.95 | Tyr258         | Ala288, Tyr285, Tyr253, Leu296, Ala295, Leu293 – hydrophobic with hydrocarbon ligand cage                        | Redocking using representative frame of MD simulation, positional constraints regarding the reference ligand with tolerance 5Å |
| 15b | RRRS | 5.92 | -9.977  |  | -69.44 | Tyr258, Ser292 | Ala288, Tyr285, Tyr253, Leu296, Ala295, Leu293 – hydrophobic with hydrocarbon ligand cage                        | Redocking using representative frame of MD simulation, positional constraints regarding the reference ligand with tolerance 5Å |
|     | SSSR |      | -9.403  |  | -63.85 | Tyr258, Ser292 | Ala288, Tyr285, Tyr253, Leu296, Ala295, Leu293 –                                                                 |                                                                                                                                |

|     |      |      |         |        |        |                |                                                                                                                     |                                                                                                                                |
|-----|------|------|---------|--------|--------|----------------|---------------------------------------------------------------------------------------------------------------------|--------------------------------------------------------------------------------------------------------------------------------|
|     |      |      |         |        |        |                | hydrophobic with hydrocarbon ligand cage                                                                            |                                                                                                                                |
| 15d | SSSR | 5.32 | -11.373 | -69.57 | -67.69 | Tyr258         | Ala288, Tyr285, Tyr253, Leu296, Ala295, Leu293 – hydrophobic with hydrocarbon ligand cage                           | Redocking using representative frame of MD simulation, positional constraints regarding the reference ligand with tolerance 5Å |
|     | RRRS |      | -11.386 | -65.81 |        | Tyr258, Ser292 | Ala288, Tyr285, Tyr253, Leu296, Ala295, Leu293 – hydrophobic with hydrocarbon ligand cage                           |                                                                                                                                |
| 15e | SSSR | 5.34 | -9.638  | -68.10 | -65.24 | Tyr258, Ser292 | Ala288, Tyr285, Tyr253, Leu296, Ala295, Leu293 – hydrophobic with hydrocarbon ligand cage                           | Redocking using representative frame of MD simulation, positional constraints regarding the reference ligand with tolerance 5Å |
|     | RRRS |      | -8.916  | -62.38 |        | Tyr258, Ser292 | Ala288, Tyr285, Tyr253, Leu296, Ala295, Leu293 – hydrophobic with hydrocarbon ligand cage                           |                                                                                                                                |
| 15f | SSSR | 5.73 | -9.972  | -57.55 | -64.24 | Tyr258         | Ala288, Tyr285, Tyr253, Leu296, Ala295, Leu293 – hydrophobic with hydrocarbon ligand cage                           | Redocking using representative frame of MD simulation, positional constraints regarding the reference ligand with tolerance 5Å |
|     | RRRS |      | -9.548  | -70.93 |        | Tyr258, Ser292 | Ala288, Tyr285, Tyr253, Leu296, Ala295, Leu293 – hydrophobic with hydrocarbon ligand cage                           |                                                                                                                                |
| 20b |      | 4.83 | -9.457  |        | -49.27 | Tyr258         | halogen bond with Tyr289, Ala288, Tyr285, Tyr253, Leu296, Ala295, Leu293 – hydrophobic with hydrocarbon ligand cage | Redocking using representative frame of MD simulation, positional constraints regarding the reference ligand with tolerance 5Å |

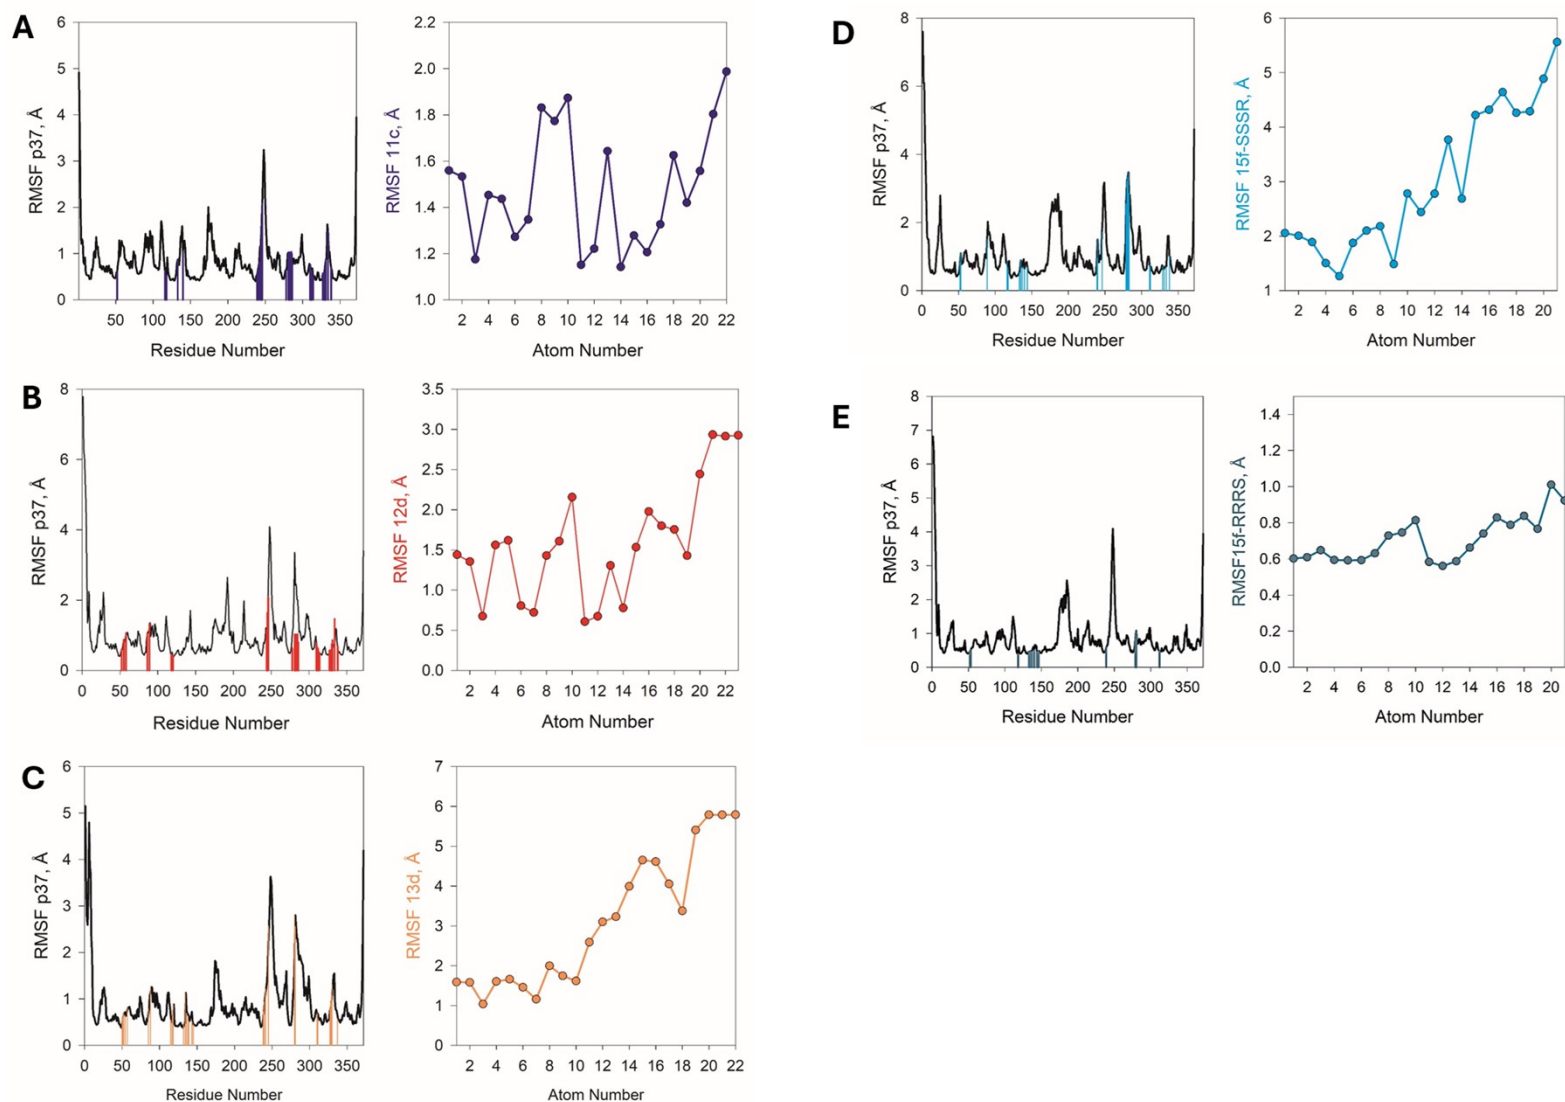

**Figure SM1.** MD trajectory analysis of the studied complexes: A – p37-11c, B – p37-12d, C – p37-13d, D – 15f-SSSR, and E – 15f-RRRS. The first plot in each panel shows the root mean square fluctuation (RMSF) of C $\alpha$  atoms, characterizing local flexibility along the protein chain. Protein residues that interact with the ligand are marked with colored vertical bars. The second plot of each panel represents the Ligand Root Mean Square Fluctuation (RMSF), characterizing changes in the ligand atom positions

## 2. HPLC-MS/MS conditions

The chromatographic system used in the study consisted of a Shimadzu LC-20AD Prominence chromatograph equipped with a cooled autosampler, binary gradient pump and column oven thermostated at 40°C. SCIEX 3200MD QTRAP mass spectrometer (SCIEX, USA) was used as a detector. Chromatographic separations were performed on a ProntoSil 120-5 C18 AQ column (2×75 mm, 5 μm, EcoNova, Novosibirsk, Russia) using mobile phase consisting of water acidified with 0.1% formic (v/v) as eluent A and methanol containing 0.1% formic acid (v/v) as eluent B. The gradient was as follows: 0 min – 3% B; 0.5 min – 3% B; 2 min – 95% B, 5.5 min – 95% B, the flow rate was 250 μL/min; the injection volume was 10 μL. After a chromatographic analysis, the column was equilibrated for an additional 3 min step.

The MS/MS detection was performed in MRM mode using positive electrospray ionization. Following mass spectrometer settings were applied: curtain gas (CUR) = 30 psi, collision-activated dissociation gas (CAD) = medium, ion source voltage (IS) = 5500 V, temperature (TEM) = 350°C, sprayer gas (GS1) = 25 psi, evaporator gas (GS2) = 25 psi, dwell time was 100 ms. Other parameters for the detection of compound **13d** and IS are given in Table SM4. The instruments were controlled and the data collected using Analyst 1.6.3 software (SCIEX), data processing was performed using MultiQuant 3.0.3 software (SCIEX).

**Table SM4.** Parameters for mass spectrometry detection of the compound **13d** and internal standard

| Analyte and its parent ion m/z, Da (Q1) | Fragment ion m/z, Da (Q3) | CE, V <sup>C</sup> | DP, V | EP, V | CXP, V |
|-----------------------------------------|---------------------------|--------------------|-------|-------|--------|
| <b>13d</b> (312.2)                      | 173.1                     | 31                 | 66    | 10.5  | 4      |
|                                         | 81.0                      | 41                 | 66    | 10.5  | 4      |
|                                         | 79.1                      | 67                 | 66    | 10.5  | 4      |
| 2-Ad (152.2, IS)                        | 107.2                     | 37                 | 21    | 3     | 8      |
|                                         | 93.1                      | 35                 | 16    | 3     | 14     |

## 3. Whole blood sample preparation for quantification of compound **13d**

A mixture of methanol and 0.2 M zinc sulfate in water (8:2, v/v) containing 1000 ng/mL of 2-Ad as an internal standard (IS) was used as the protein precipitation solution. For sample processing, a 10 μL aliquot of the blood sample was added to 150 μL of the precipitation solution. The mixture was then vortexed for 30 seconds and incubated for 20 minutes at ambient temperature. Following

incubation, the sample was vortexed again for 30 seconds and centrifuged at 13,400g for 10 minutes (Eppendorf Centrifuge 5424). Finally, 140  $\mu\text{L}$  of the supernatant was transferred to an insert in a vial for subsequent analysis.

#### 4. Stability study of compound **13d** in whole murine blood

33  $\mu\text{L}$  aliquot of a methanolic solution of the compound (1000 ng/mL) was added to 297  $\mu\text{L}$  of murine whole blood, yielding a final concentration of 100 ng/mL. Aliquots (10  $\mu\text{L}$ ) of the spiked blood were taken 5, 10, 20, 40, 60, 90, 120, and 180 minutes after sample preparation, three samples being taken at each time point.

The samples were analyzed, and the peak areas on the chromatograms were assessed for compound **13d**. The value obtained for the sample taken at the first time point (5 min) was set at 100%. The relative amount of the compound remaining in blood was calculated as the percentage ratio of the peak area at a given time point to the initial peak area (at 5 min).

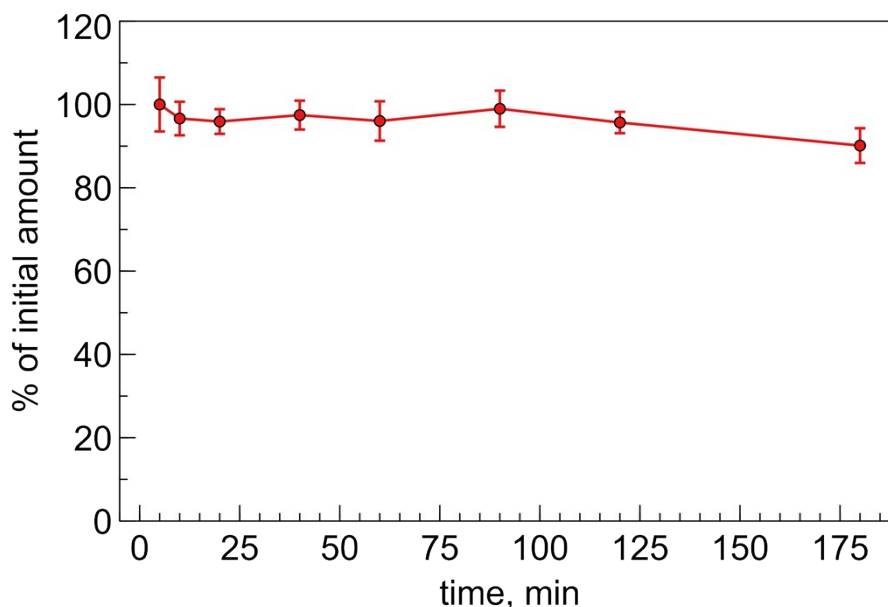

**Figure SM2.** Kinetic dependence of the compound **13d** concentration in blood.

#### 5. Stock solutions and calibration solutions

A stock solution of compound **13d** as prepared by dissolving a weighed amount of the substance in methanol to obtain a concentration of 1.0 mg/mL. This stock solution was subsequently diluted in methanol to prepare a series of working solutions with concentrations of 50, 100, 500, 1000, 5000, 10000 and 50000 ng/mL. For spiking, 33  $\mu\text{L}$  of each working solution was mixed with 297  $\mu\text{L}$  of whole murine blood stabilized with EDTA, resulting in spiked blood samples with final concentrations of 5, 10, 50, 100, 500, 1000, and 5000 ng/mL. The obtained calibrators were then processed as described above.

## **6. Experiments on animals**

The pharmacokinetics of compound **13d** was studied at a dose of 100 mg/kg following its intragastric administration in the form of a suspension with tween-80. Eight animals participated in the experiment. After administration of the substance, blood (10  $\mu$ L) was taken from the tail vein at 5, 10, 20, 30, 60 min, 2, 3, 4, 5, 6, 8 and 24 h after administration. The sample was mixed with a precipitating solution and processed according to the protocol described above.

## 7. NMR $^1\text{H}$ and $^{13}\text{C}$ spectra

### Compound 11a

$^{13}\text{C}$ , JMOD,  $\text{CDCl}_3$

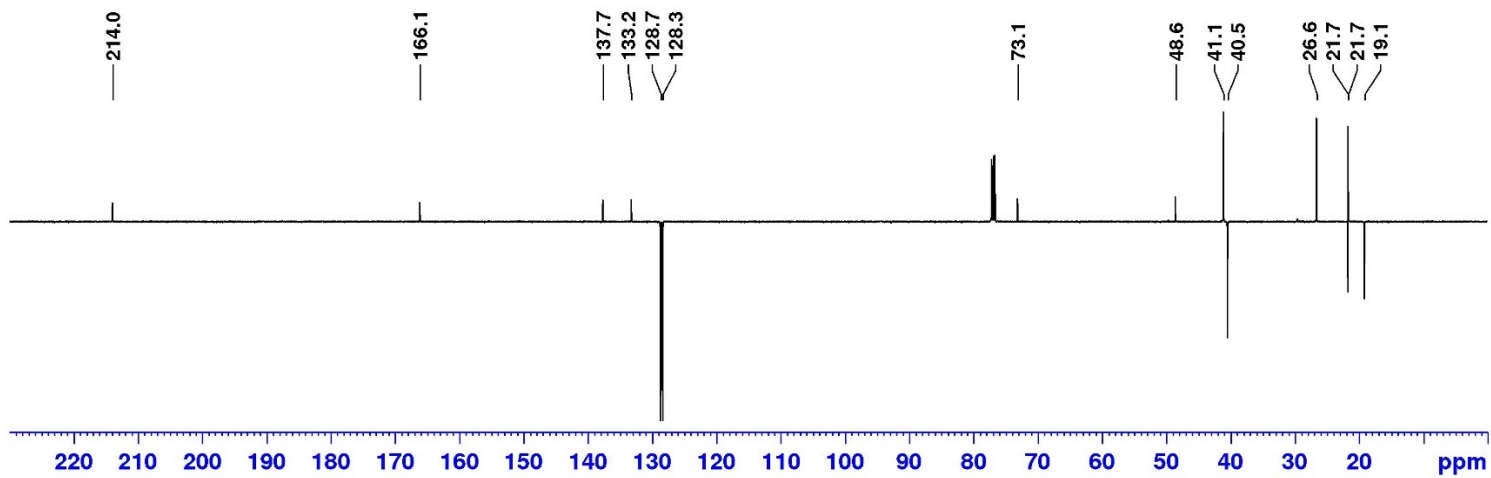

$^1\text{H}$ , 300MHz,  $\text{CDCl}_3$

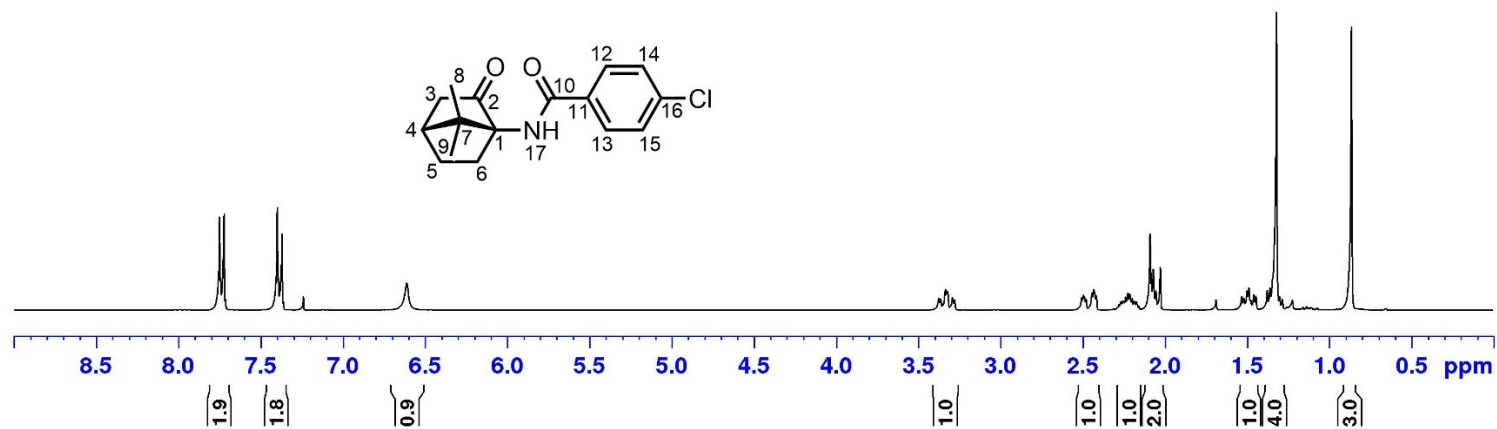

# Compound 11b

<sup>13</sup>C, JMOD, CDCl<sub>3</sub>

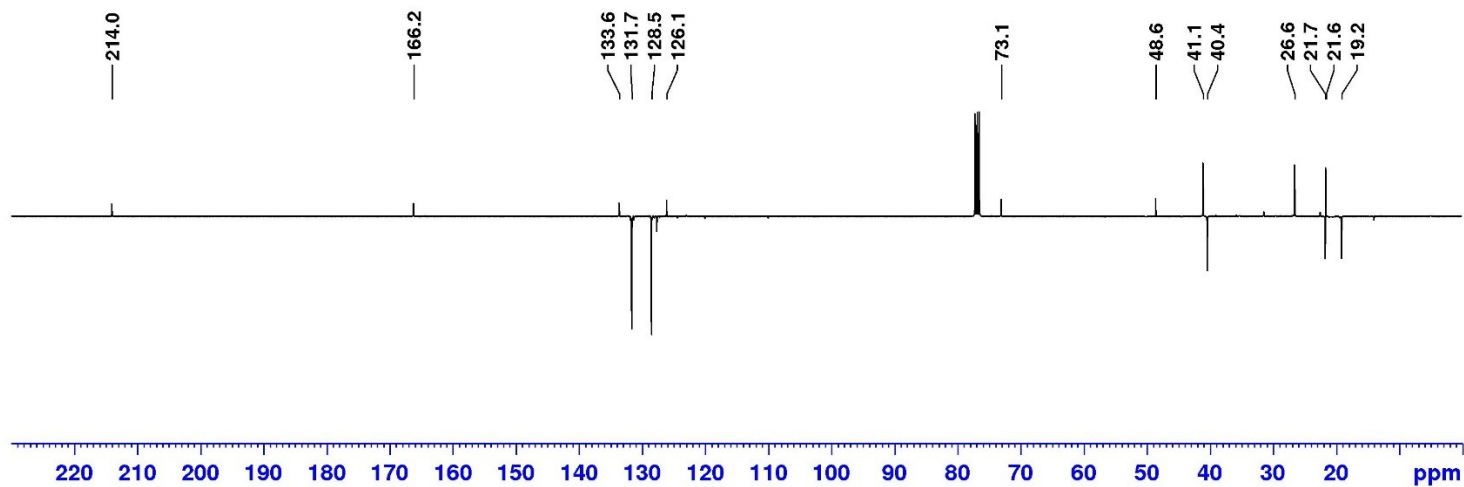

<sup>1</sup>H, 500 MHz, CDCl<sub>3</sub>

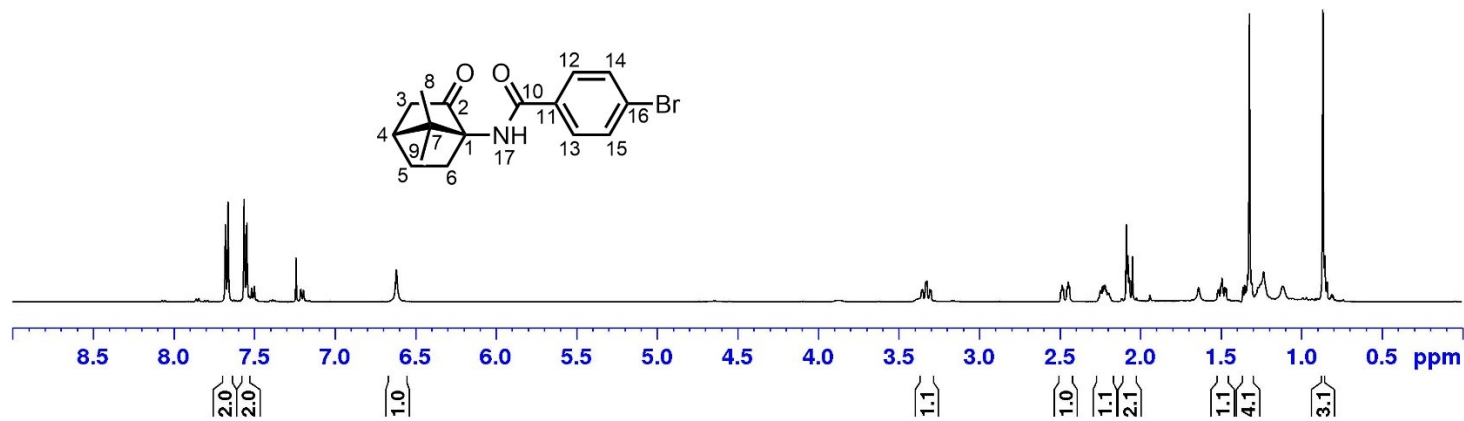

# Compound 11c

<sup>13</sup>C, JMOD, CDCl<sub>3</sub>

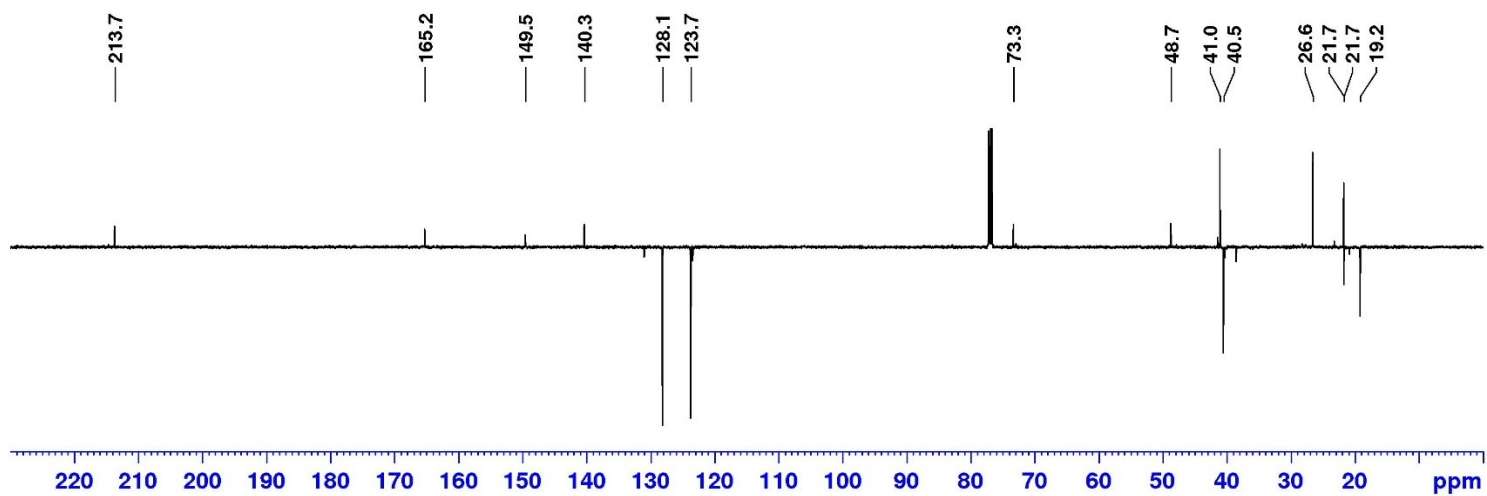

<sup>1</sup>H, 500 MHz, CDCl<sub>3</sub>

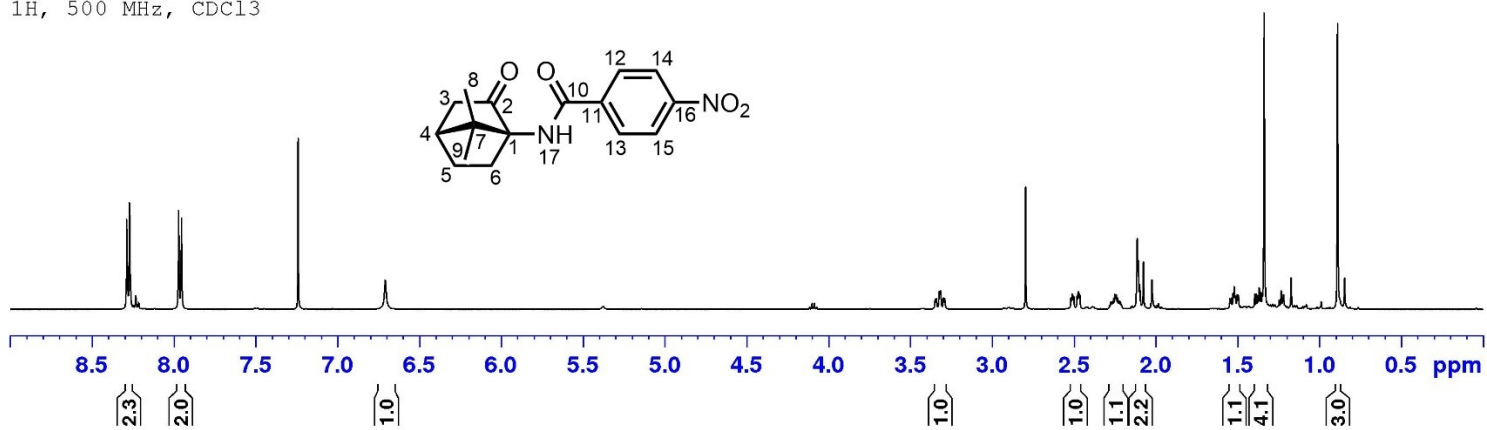

# Compound 11d

<sup>13</sup>C, JMOD, CDCl<sub>3</sub>

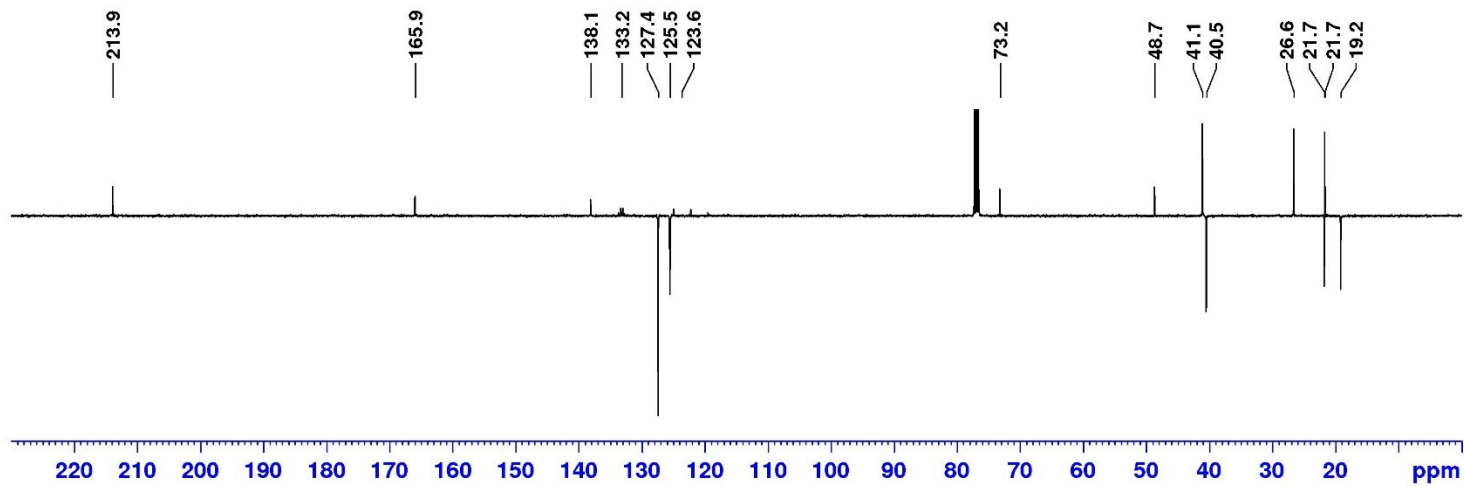

<sup>1</sup>H, 400 MHz, CDCl<sub>3</sub>

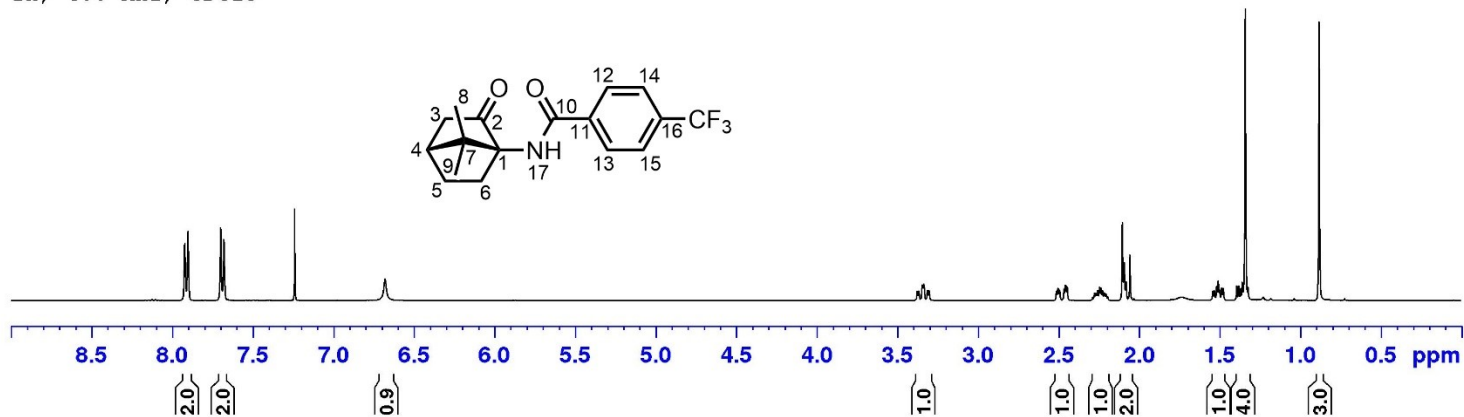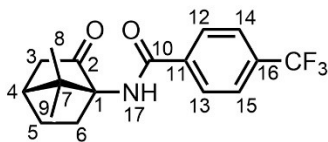

# Compound 11e

<sup>13</sup>C, JMOD, CDCl<sub>3</sub>

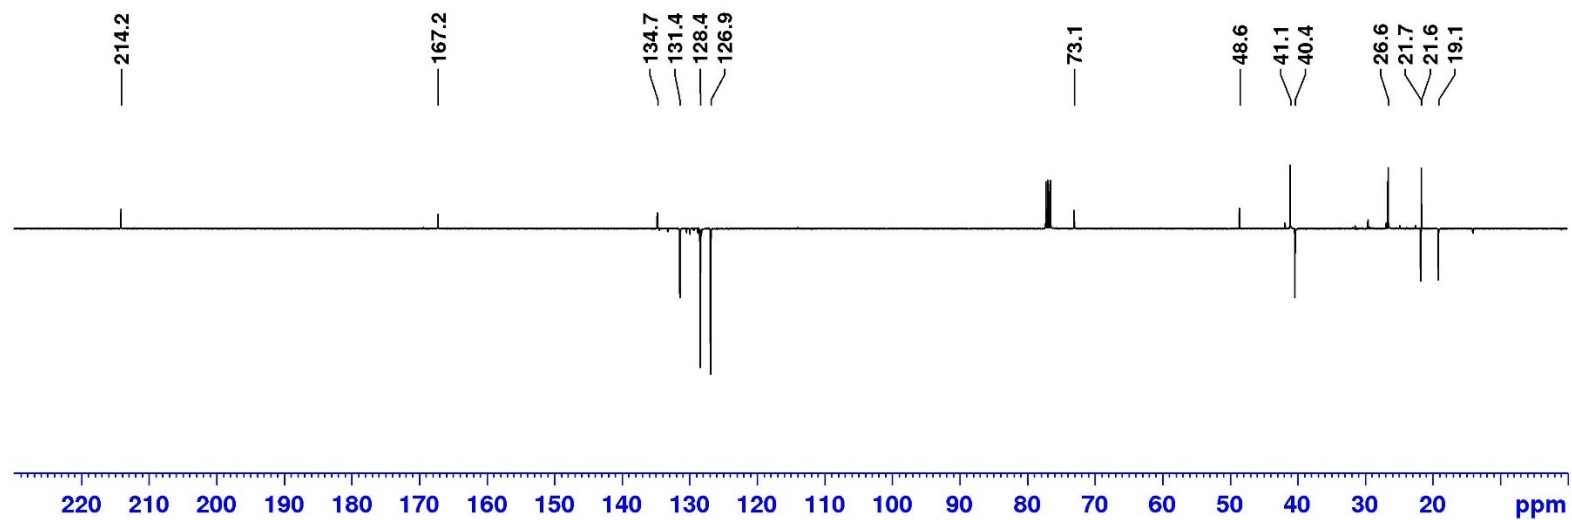

<sup>1</sup>H, 400MHz, CDCl<sub>3</sub>

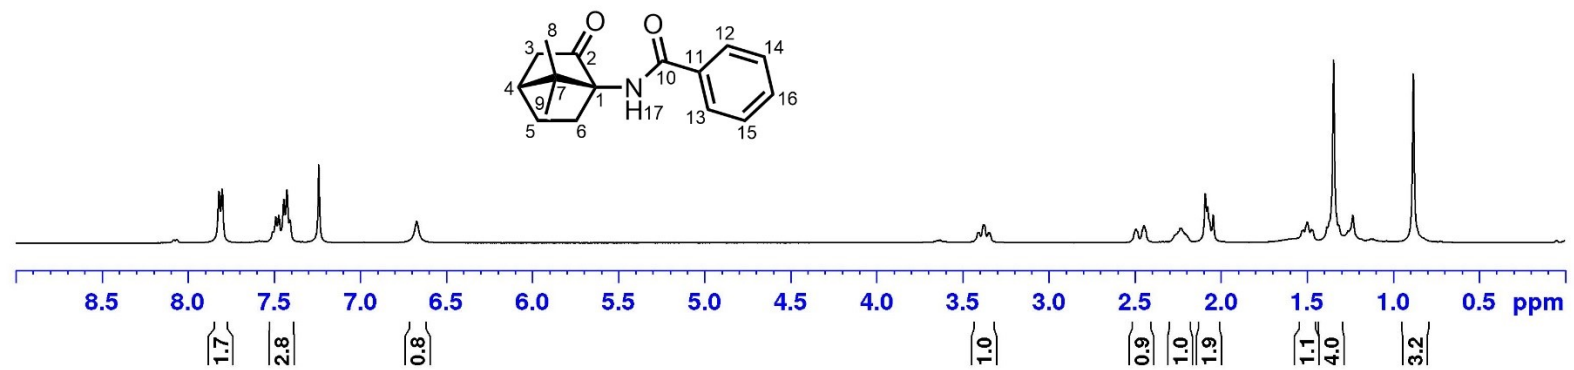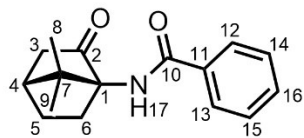

# Compound 11f

<sup>13</sup>C, JMOD, CDC13

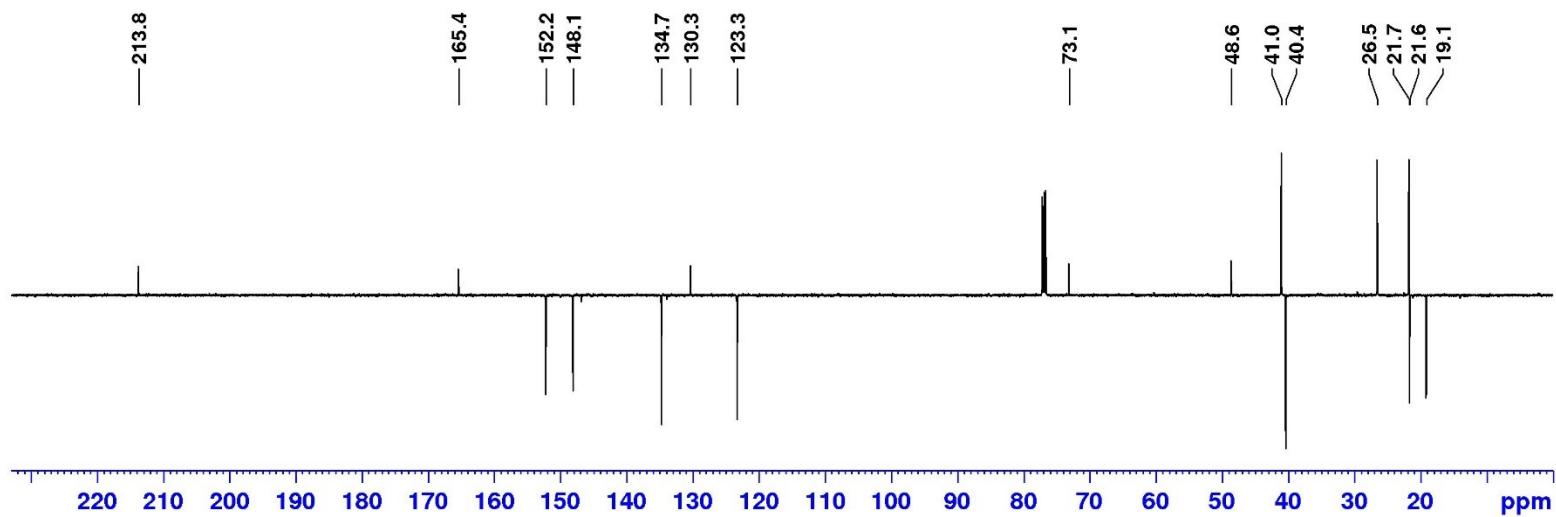

<sup>1</sup>H, 400MHz, CDC13

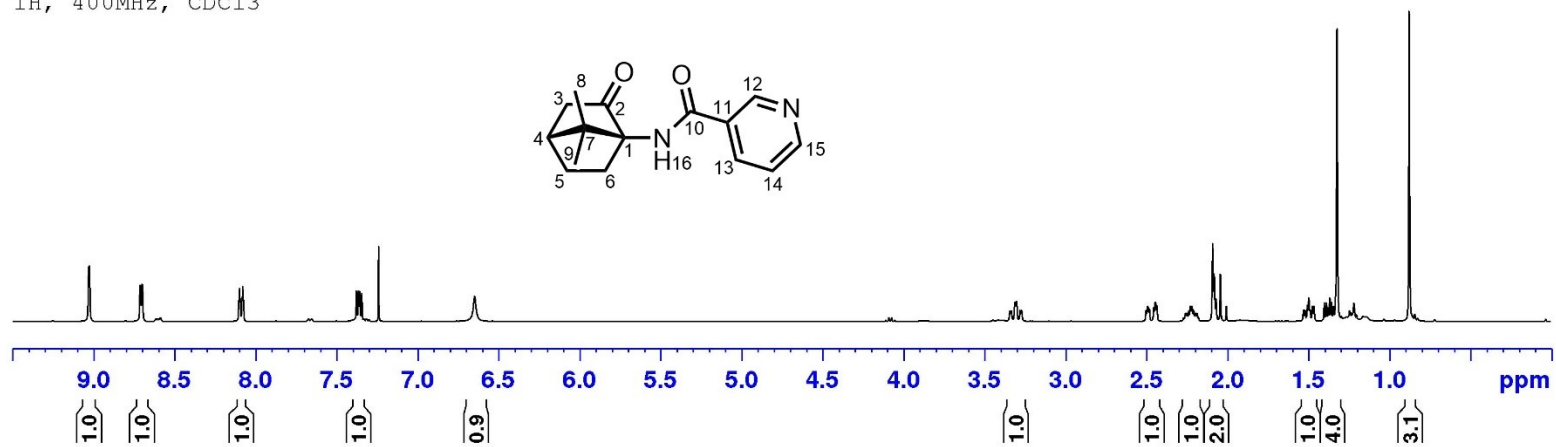

# Compound 11g

$^{13}\text{C}$ , JMOD,  $\text{CDCl}_3$

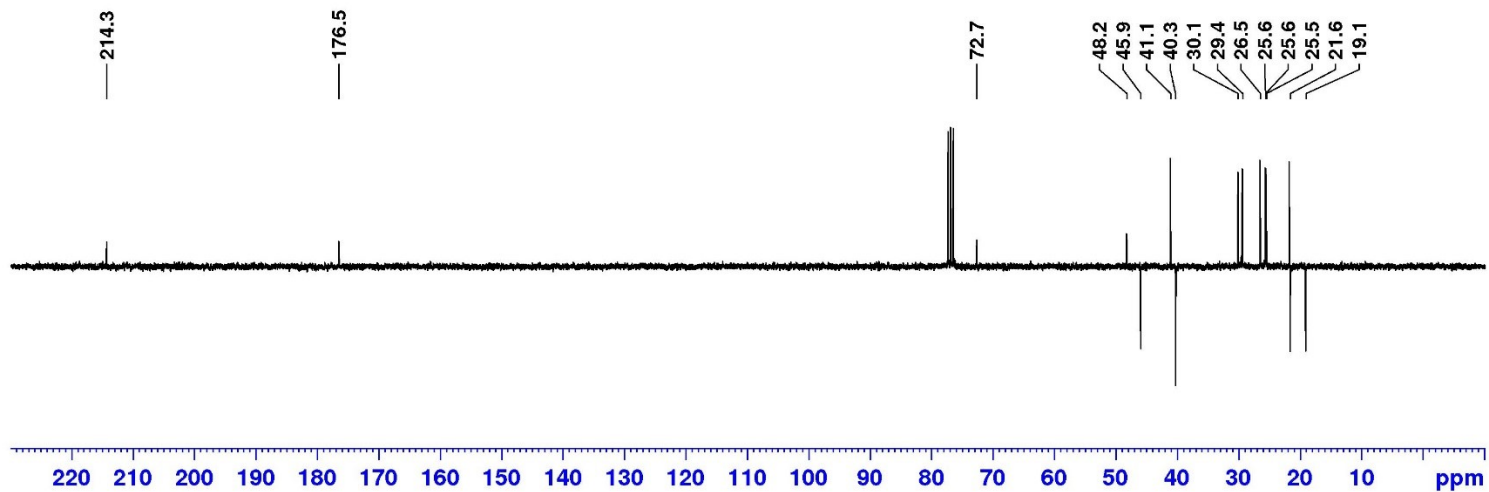

$^1\text{H}$ , 500 MHz,  $\text{CDCl}_3$

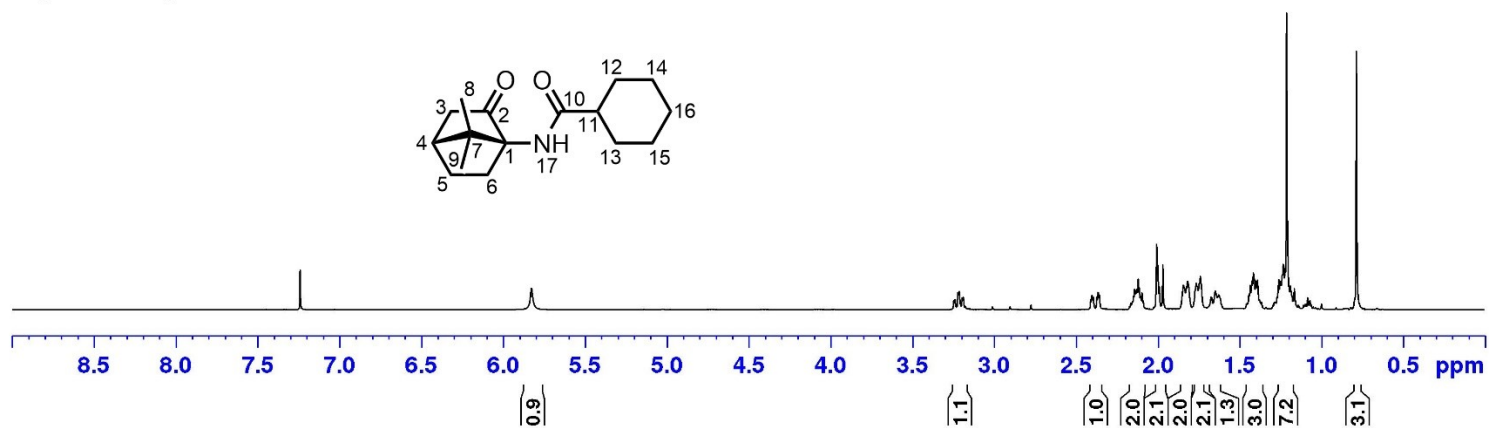

# Compound 12a

<sup>13</sup>C, JMOD, CDCl<sub>3</sub>

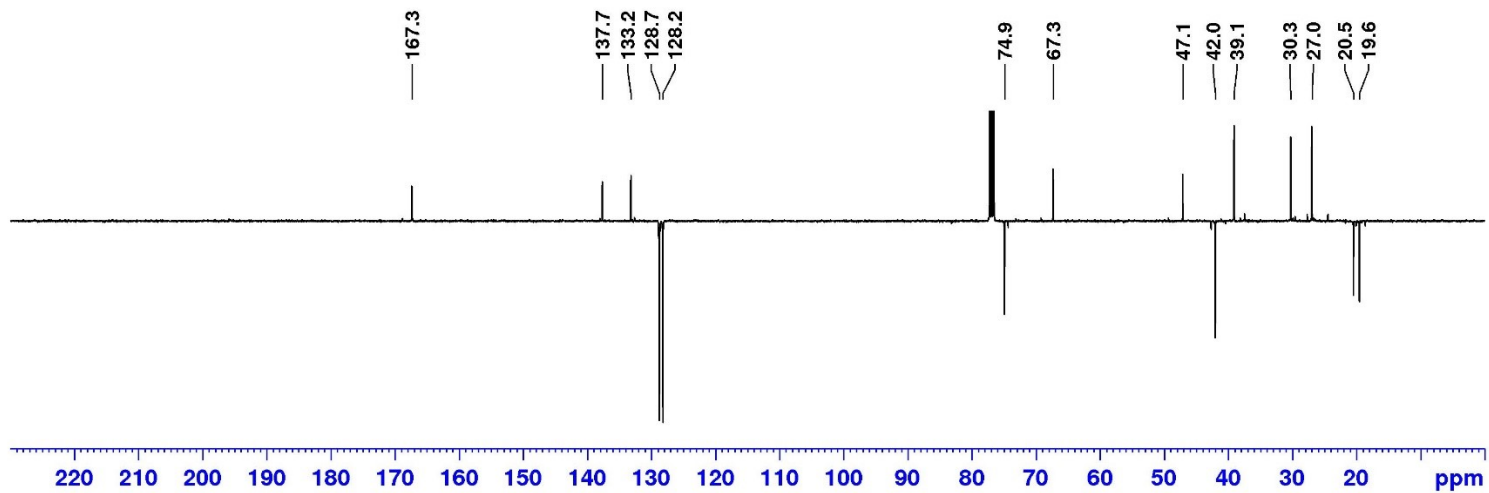

<sup>1</sup>H, 400 MHz, CDCl<sub>3</sub>

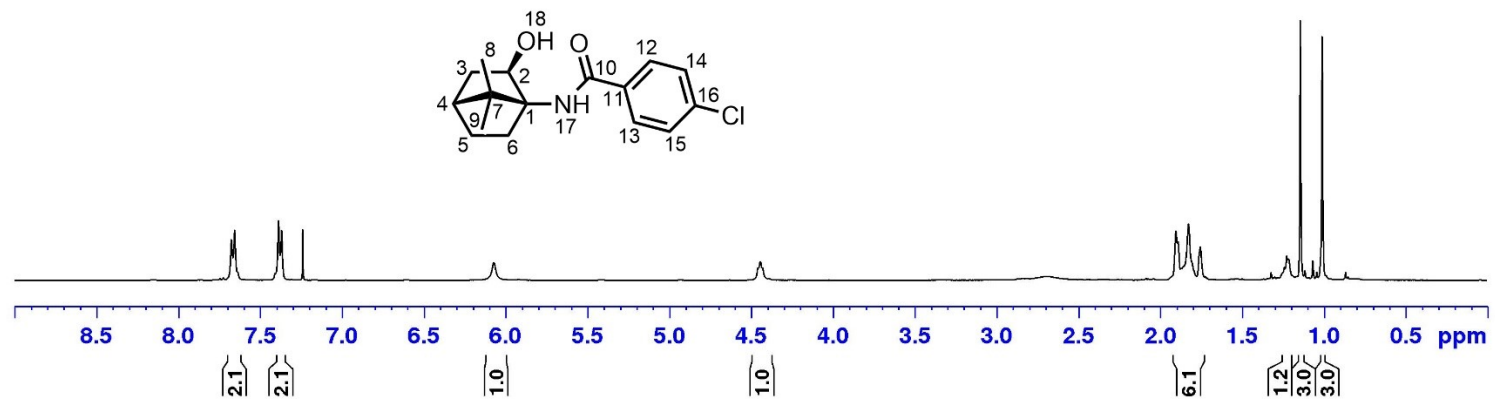

# Compound 12b

$^{13}\text{C}$ , JMOD,  $\text{CDCl}_3$

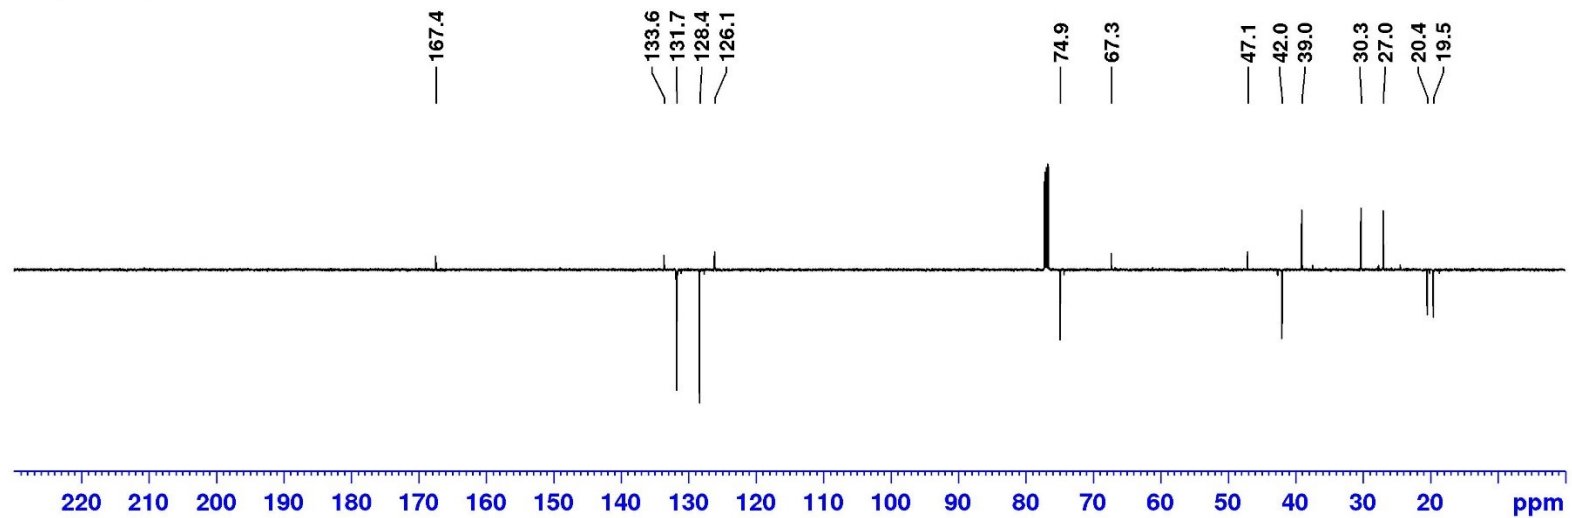

$^1\text{H}$ , 500MHz,  $\text{CDCl}_3$

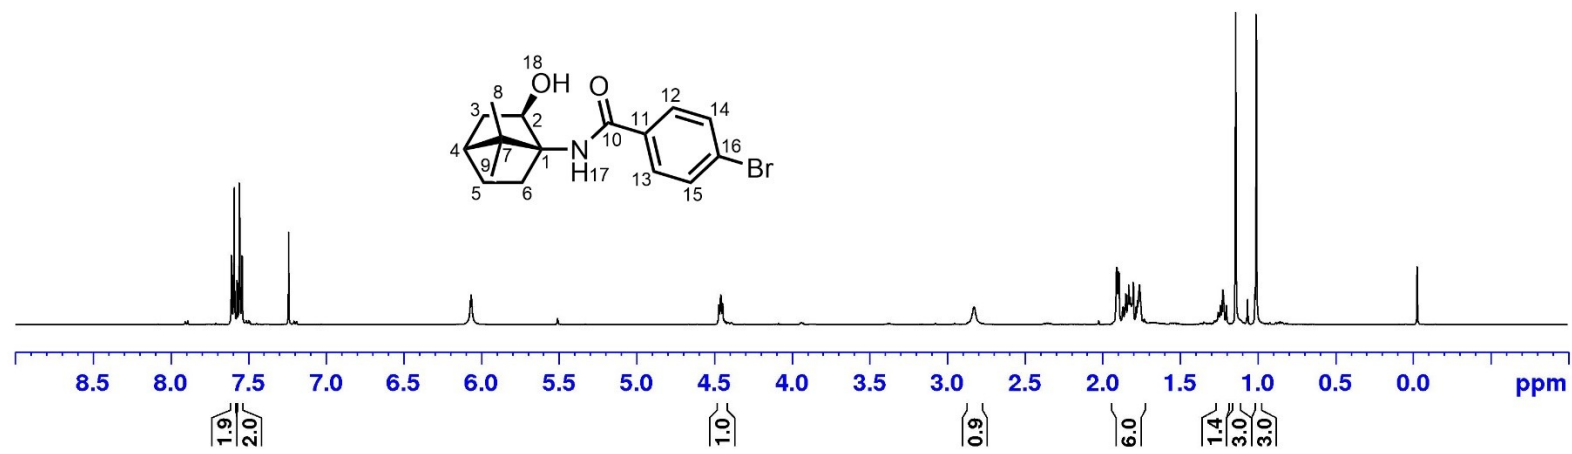

# Compound 12c

<sup>13</sup>C, JMOD, CDCl<sub>3</sub>

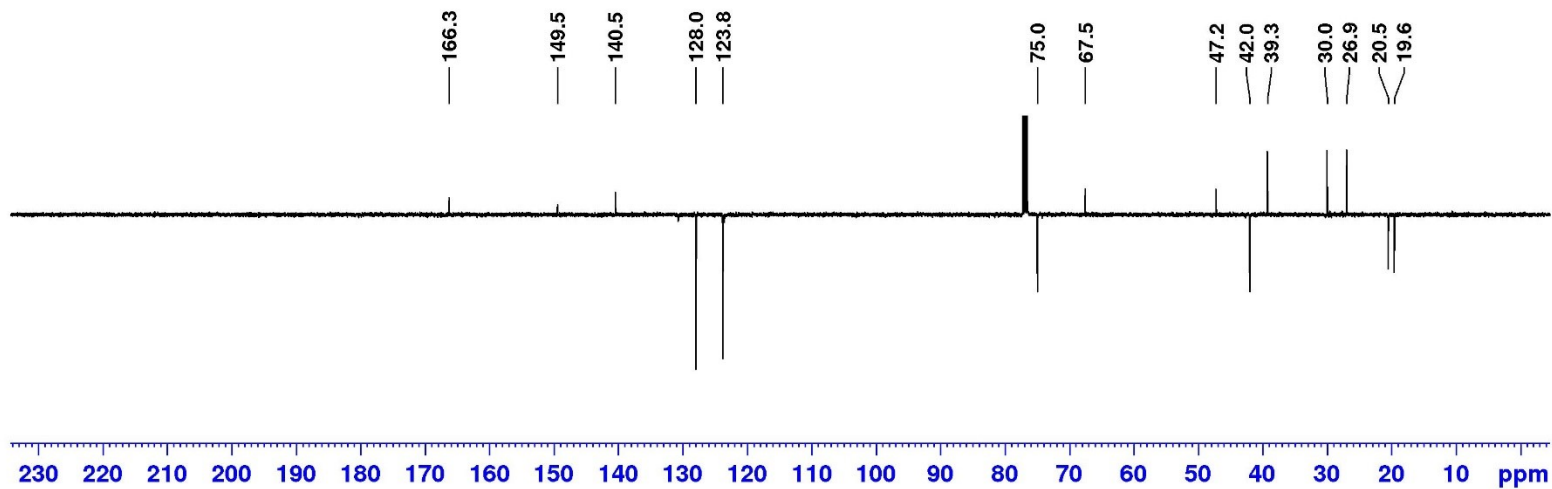

<sup>1</sup>H, 500 MHz, CDCl<sub>3</sub>

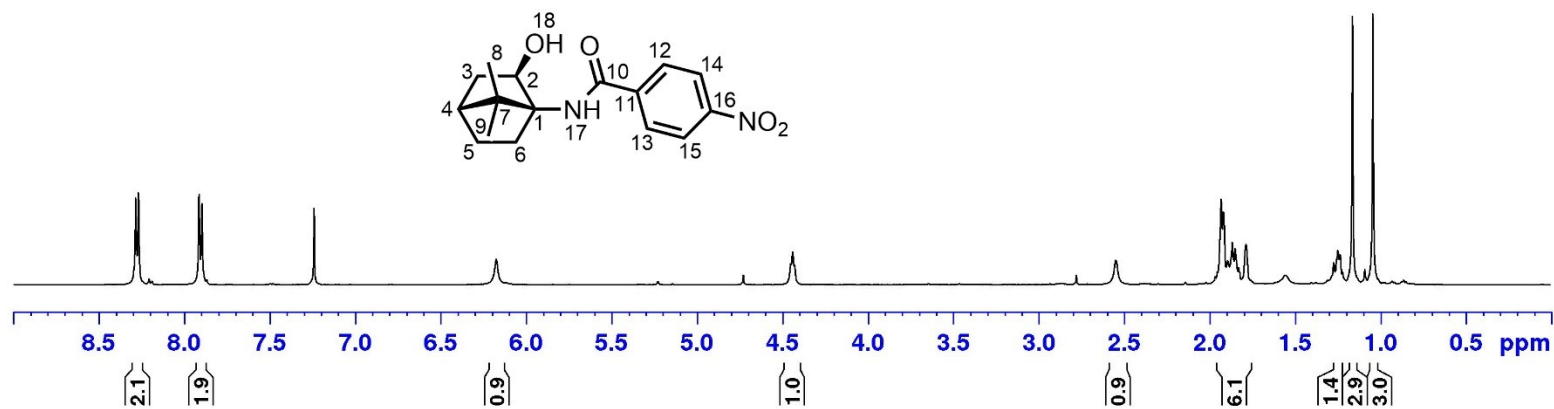

# Compound 12d

$^{13}\text{C}$ , JMOD,  $\text{CDCl}_3$

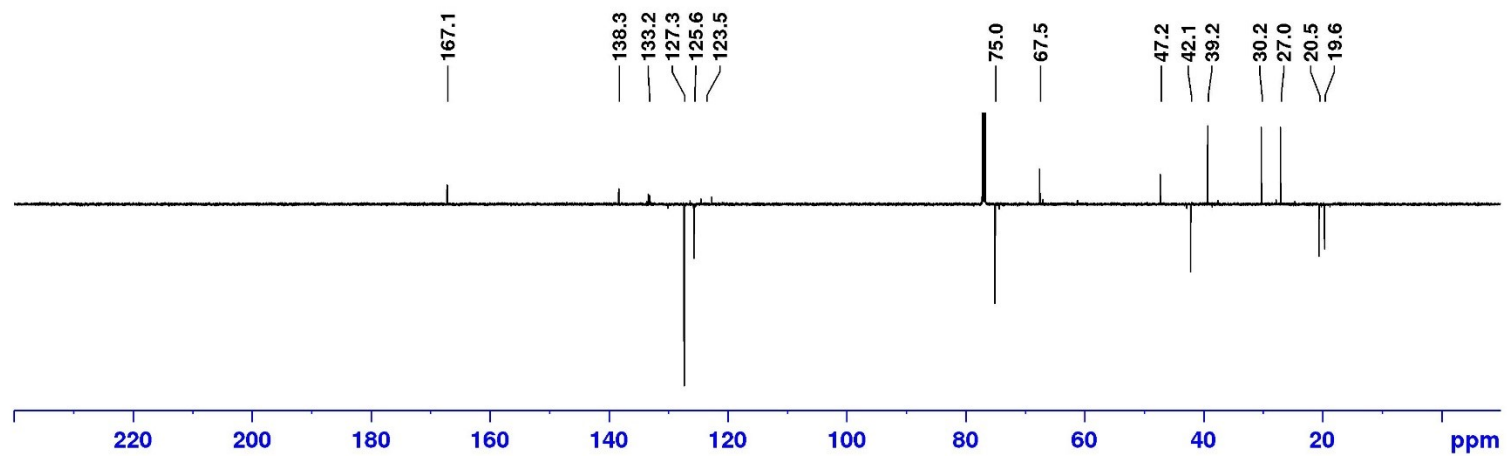

$^1\text{H}$ , 500 MHz,  $\text{CDCl}_3$

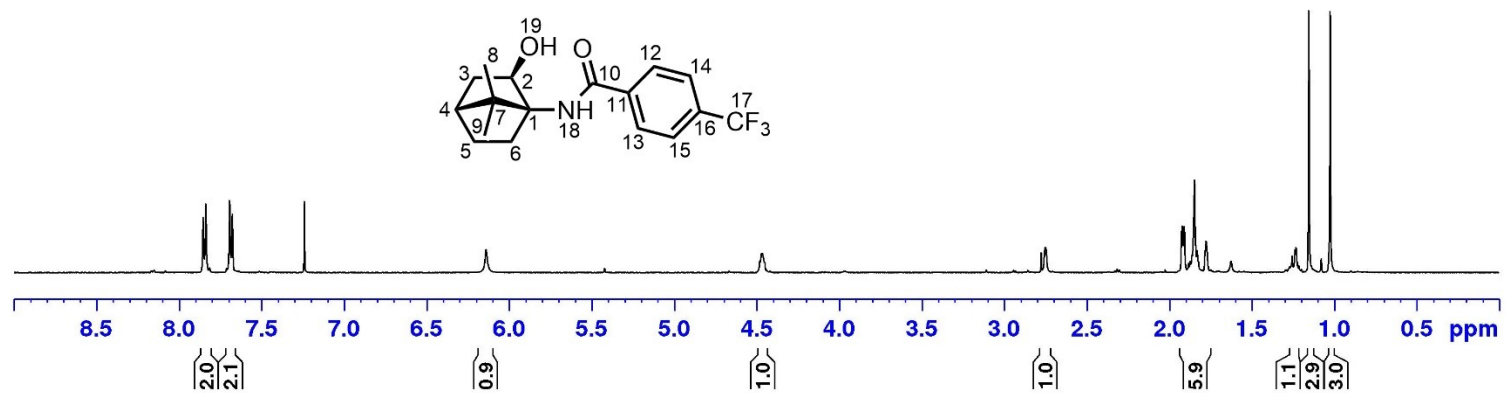

# Compound 12e

<sup>13</sup>C, JMOD, CDCl<sub>3</sub>

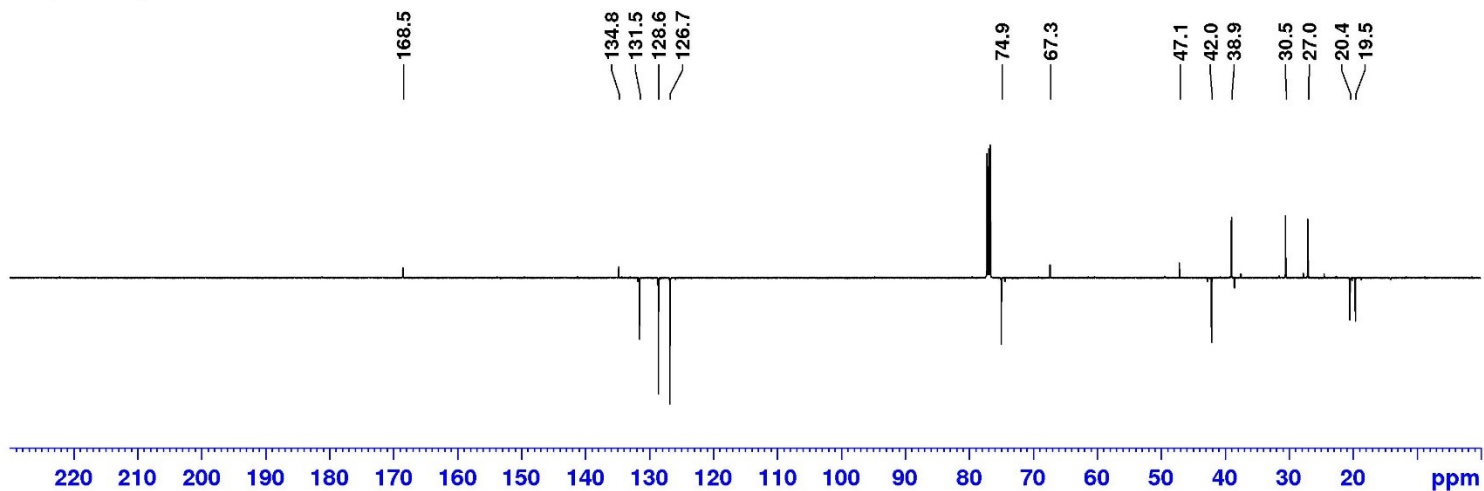

<sup>1</sup>H, 400 MHz, CDCl<sub>3</sub>

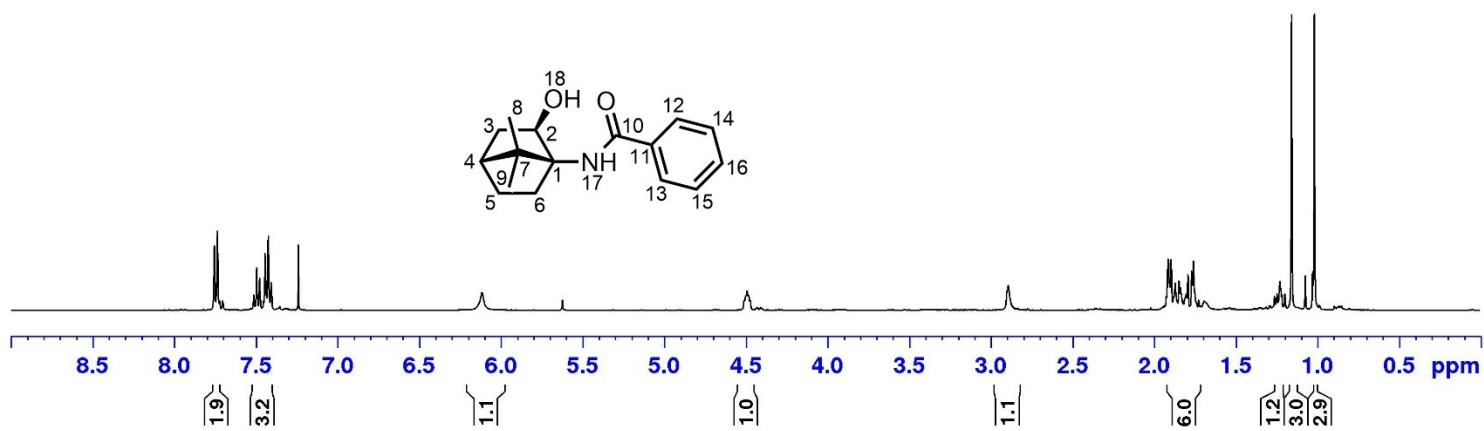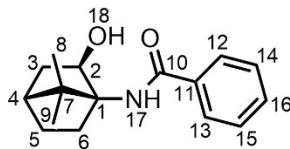

# Compound 12f

$^{13}\text{C}$ , JMOD,  $\text{CDCl}_3$

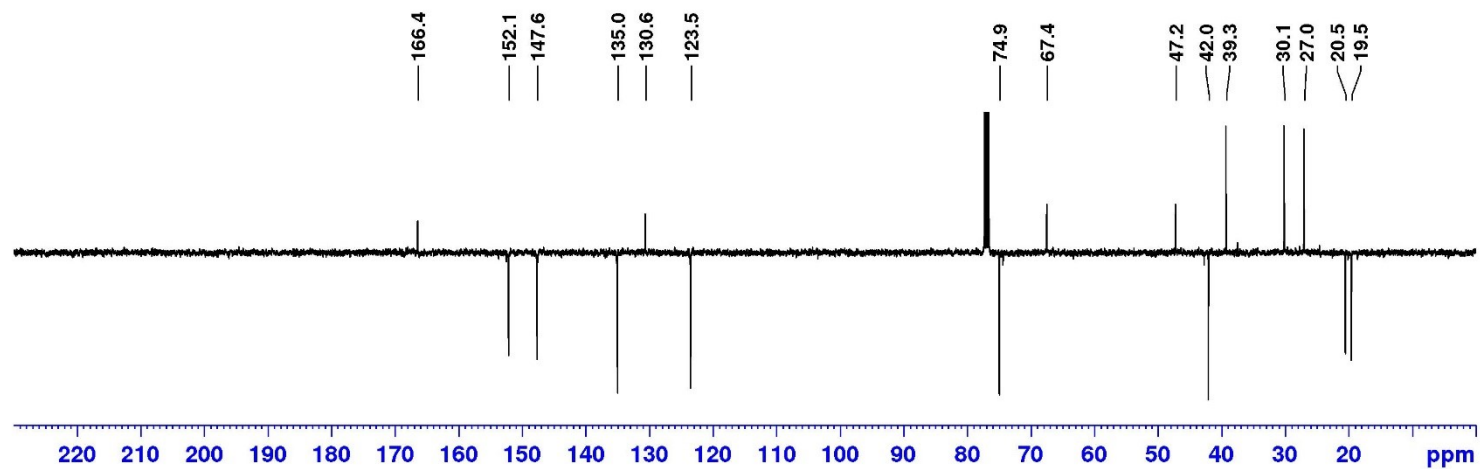

$^1\text{H}$ , 300 MHz,  $\text{CDCl}_3$

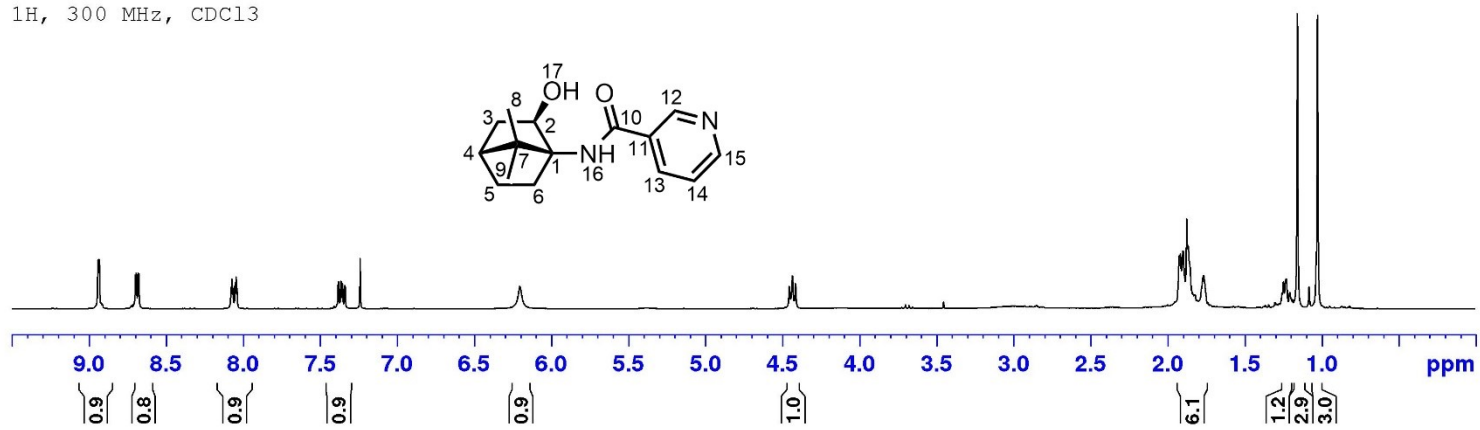

# Compound 12g

$^{13}\text{C}$ , JMOD,  $\text{CDCl}_3$

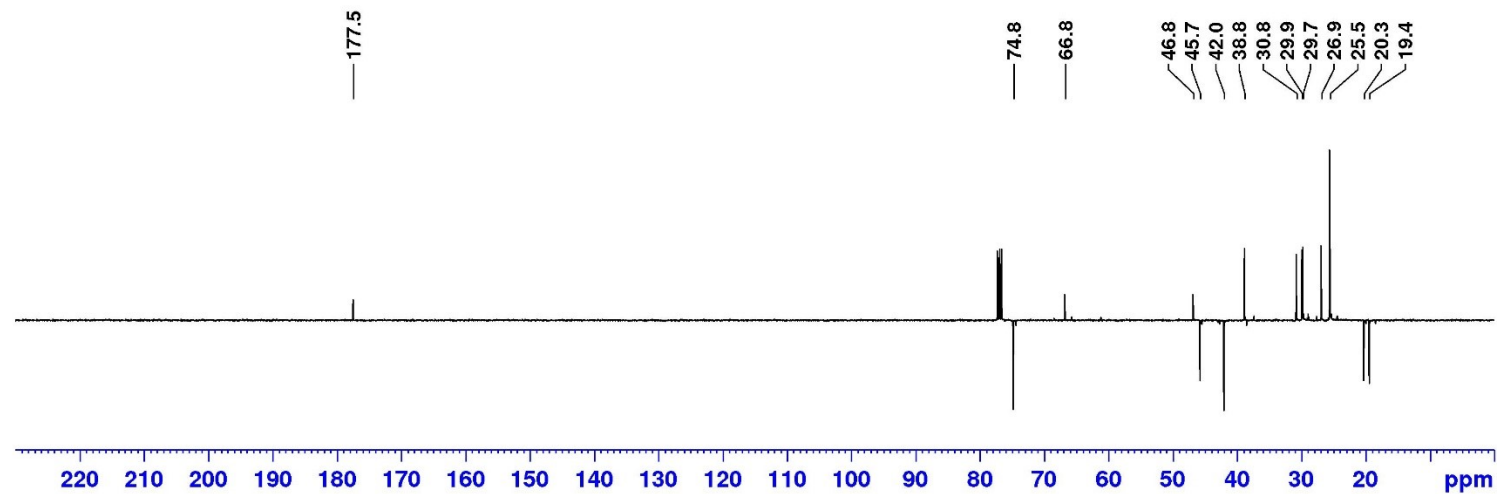

$^1\text{H}$ , 400 MHz,  $\text{CDCl}_3$

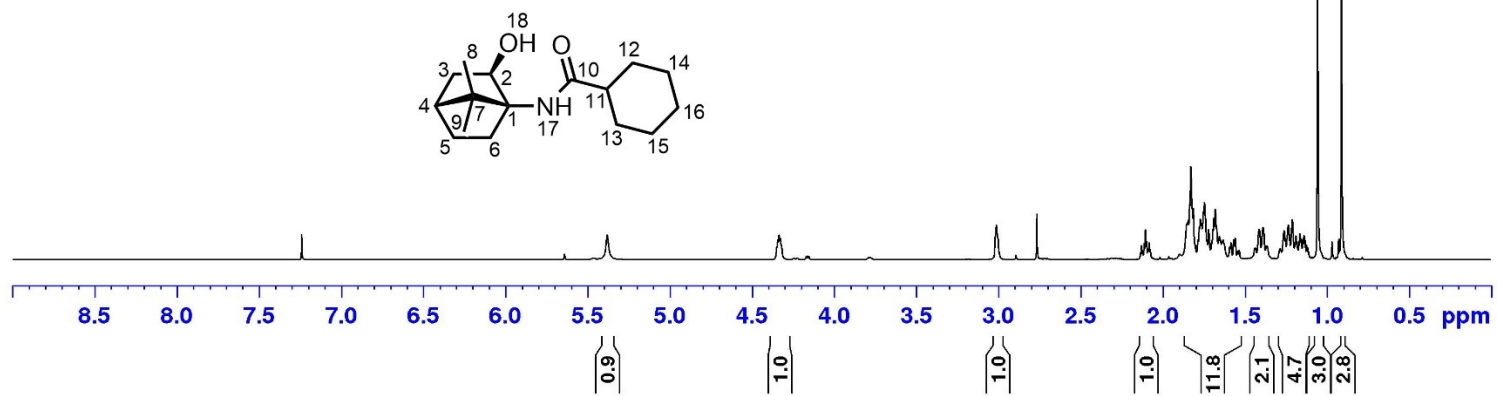

# Compound 12h

<sup>13</sup>C, JMOD, CDCL<sub>3</sub>

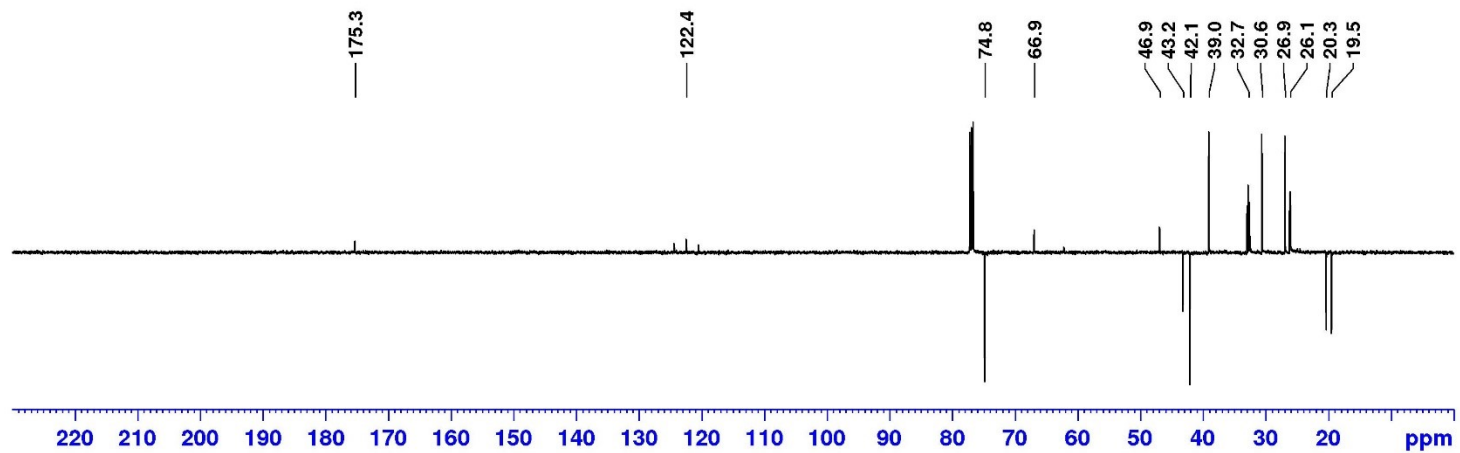

<sup>1</sup>H, 300 MHz, CDCL<sub>3</sub>

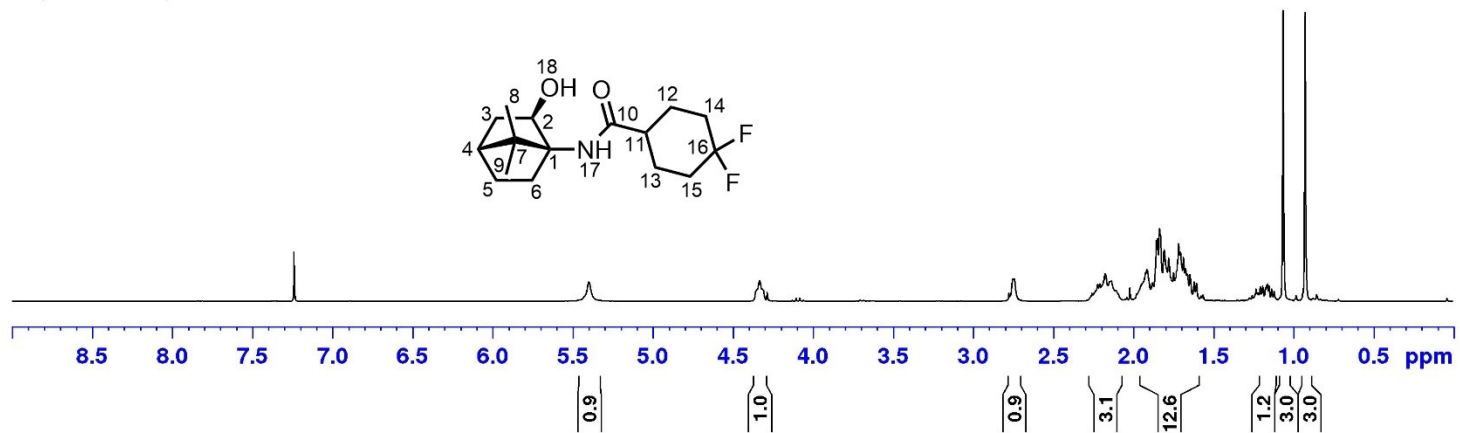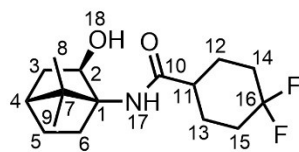

# Compound 13a

<sup>13</sup>C, JMOD, CDCl<sub>3</sub>

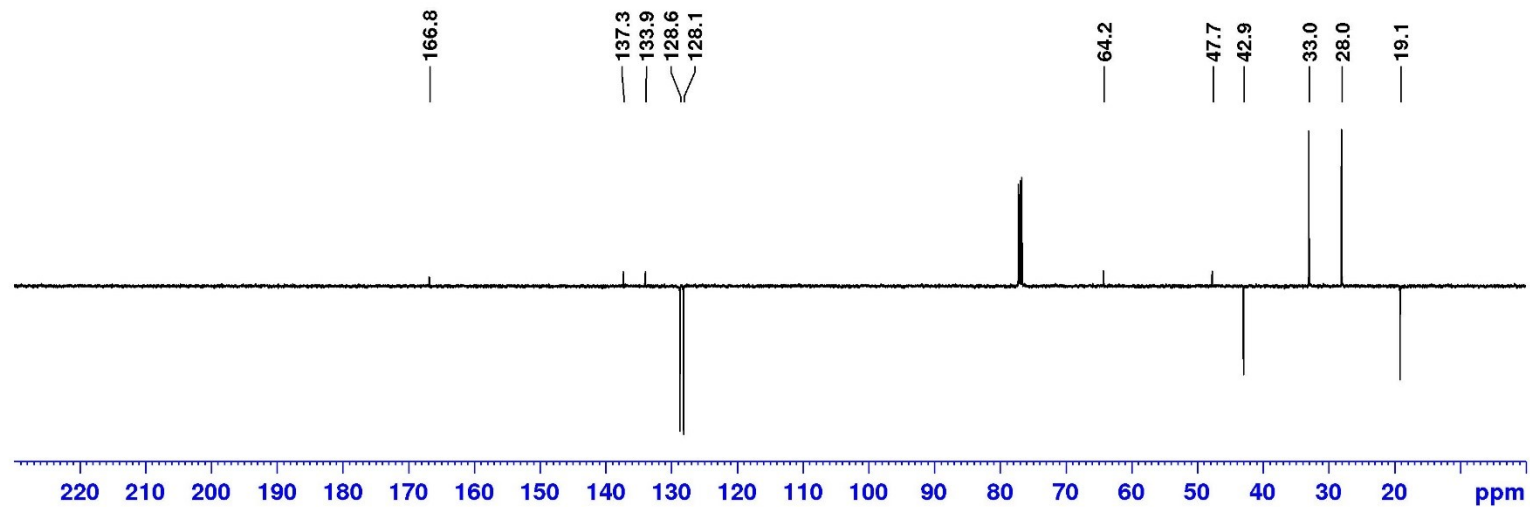

<sup>1</sup>H, 300 MHz, CDCl<sub>3</sub>

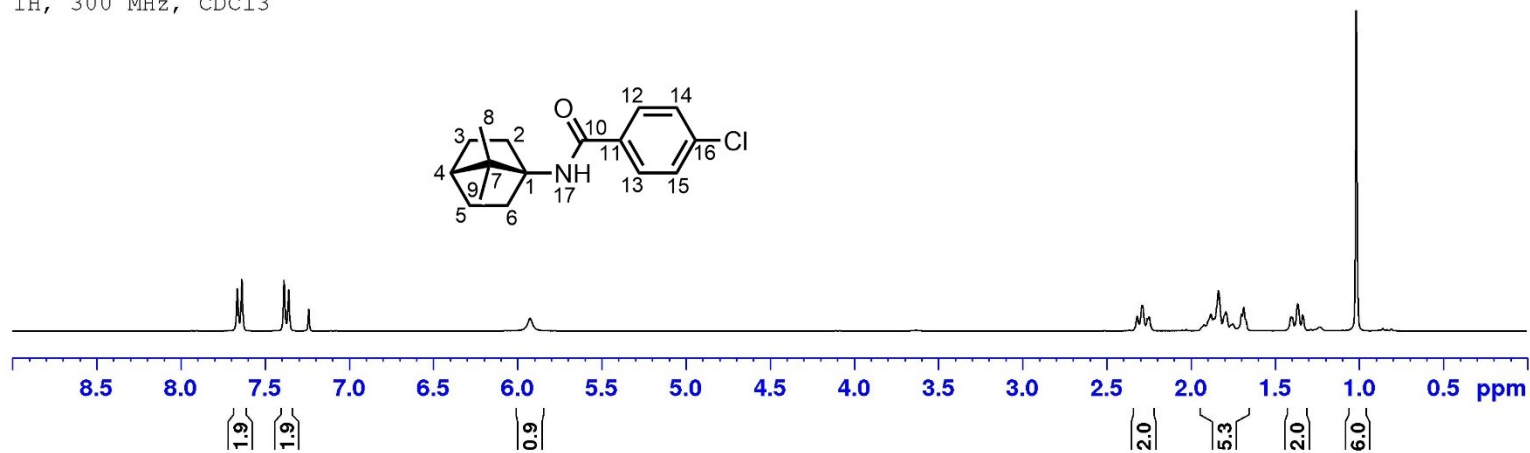

# Compound 13b

<sup>13</sup>C, JMOD, CDCl<sub>3</sub>

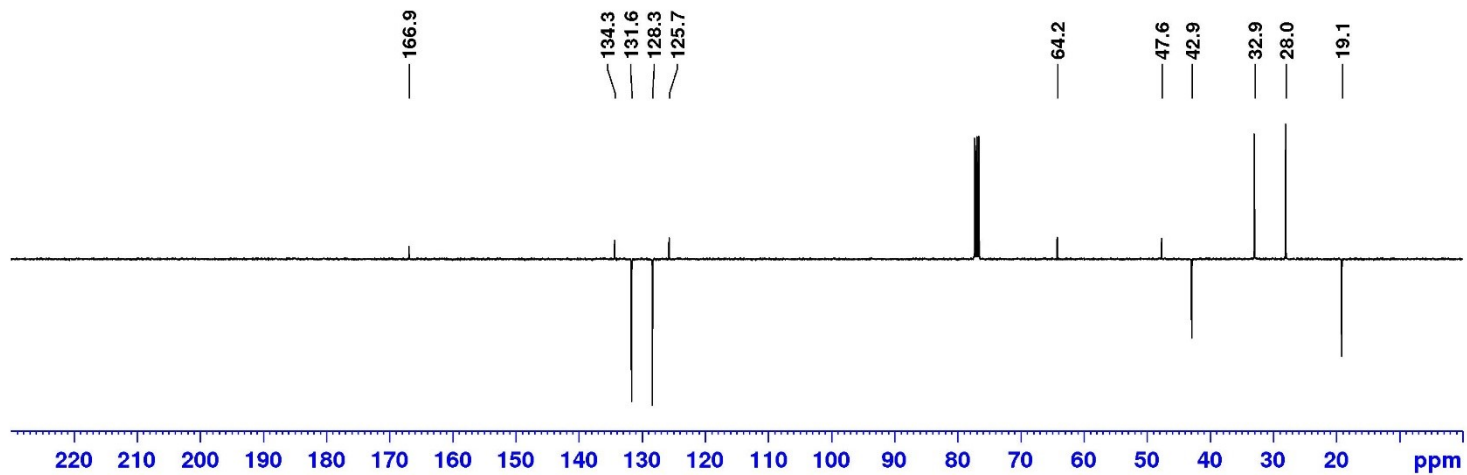

<sup>1</sup>H, 300 MHz, CDCl<sub>3</sub>

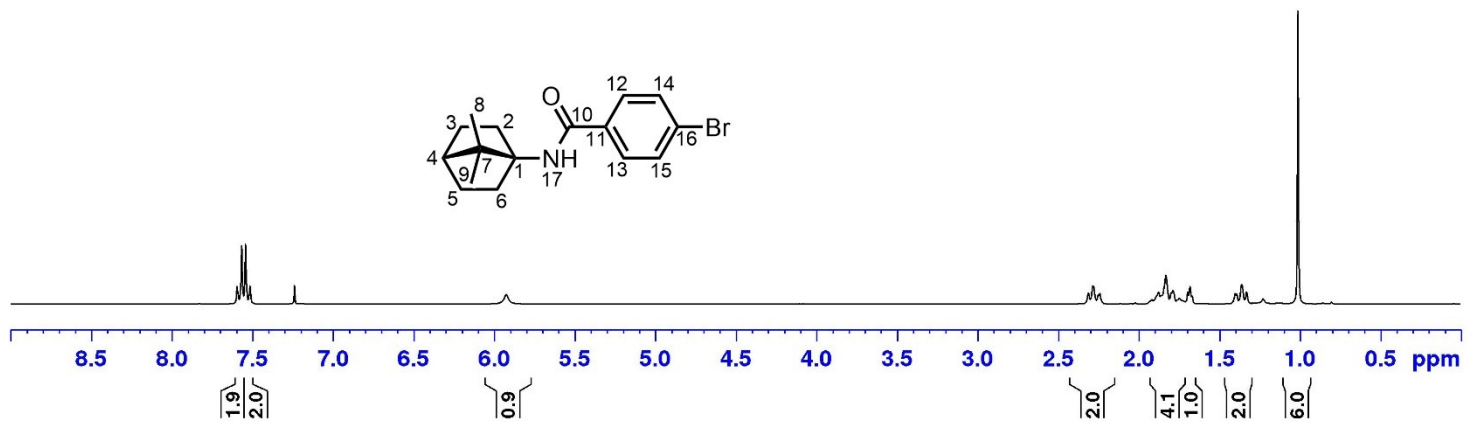

# Compound 13c

<sup>13</sup>C, JMOD, CDC13

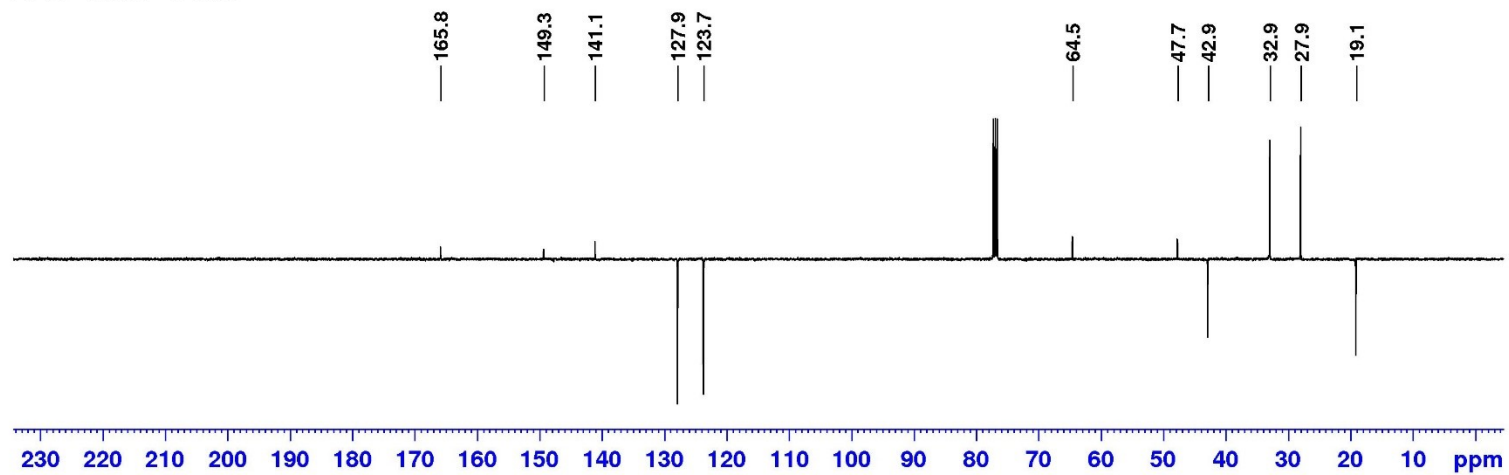

<sup>1</sup>H, 300 MHz, CDC13

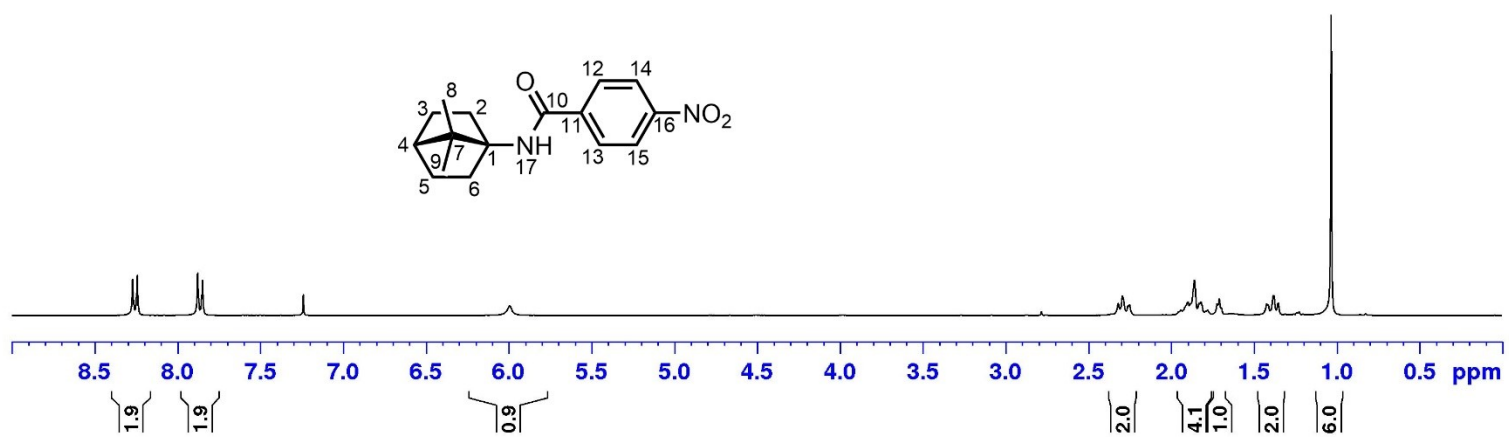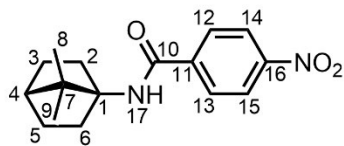

# Compound 13d

$^{13}\text{C}$ , JMOD,  $\text{CDCl}_3$

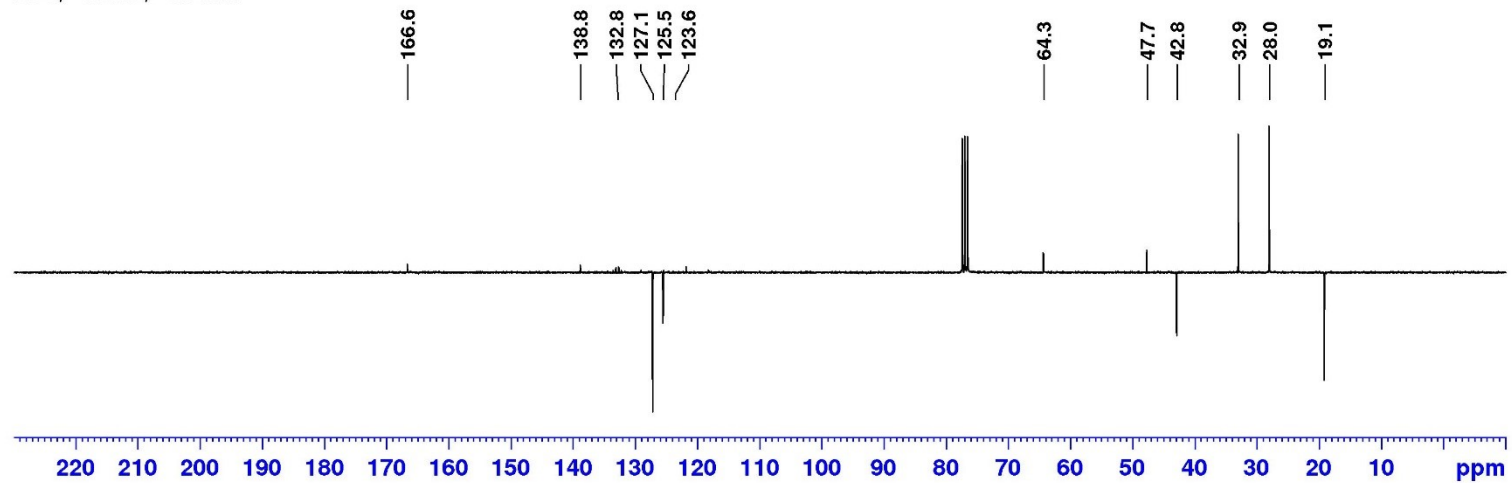

$^1\text{H}$ , 400 MHz,  $\text{CDCl}_3$

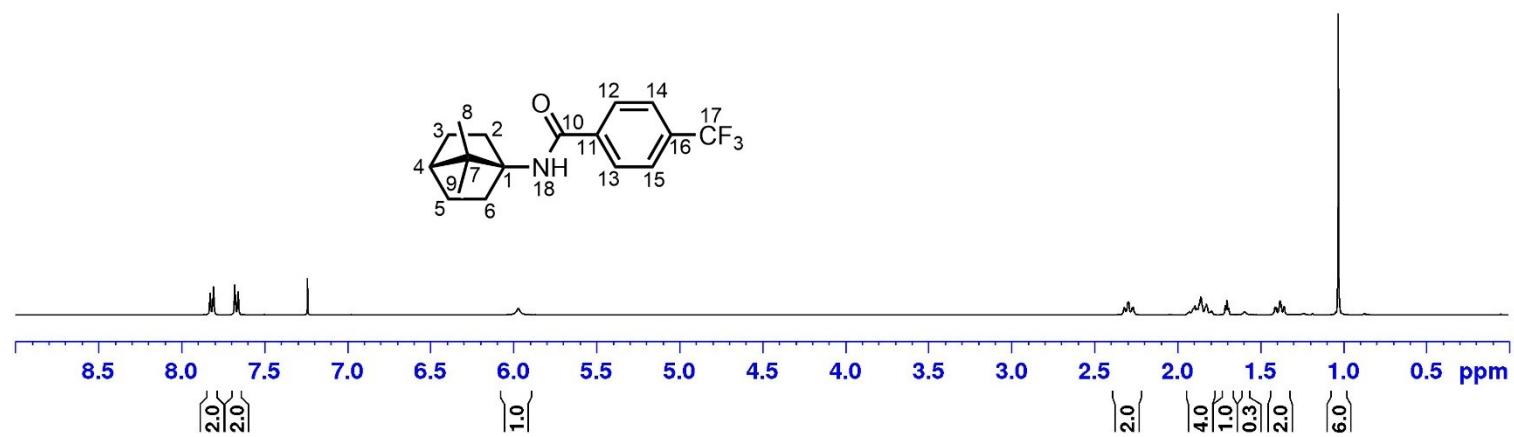

# Compound 13e

<sup>13</sup>C, JMOD, CDCl<sub>3</sub>

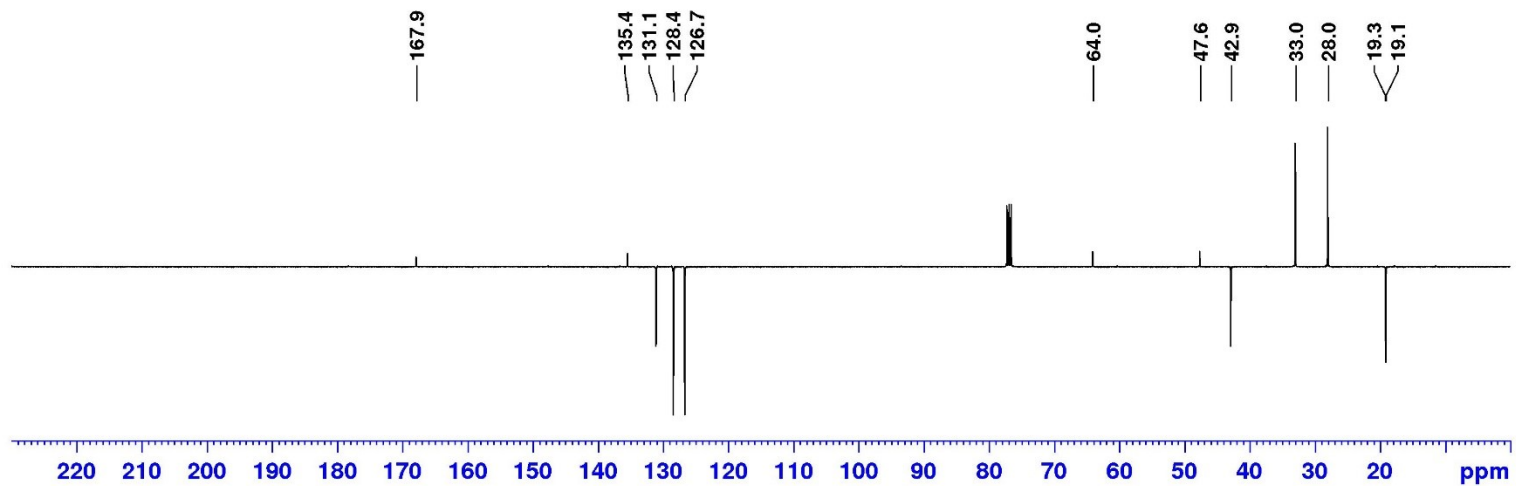

<sup>1</sup>H, 400MHz, CDCl<sub>3</sub>

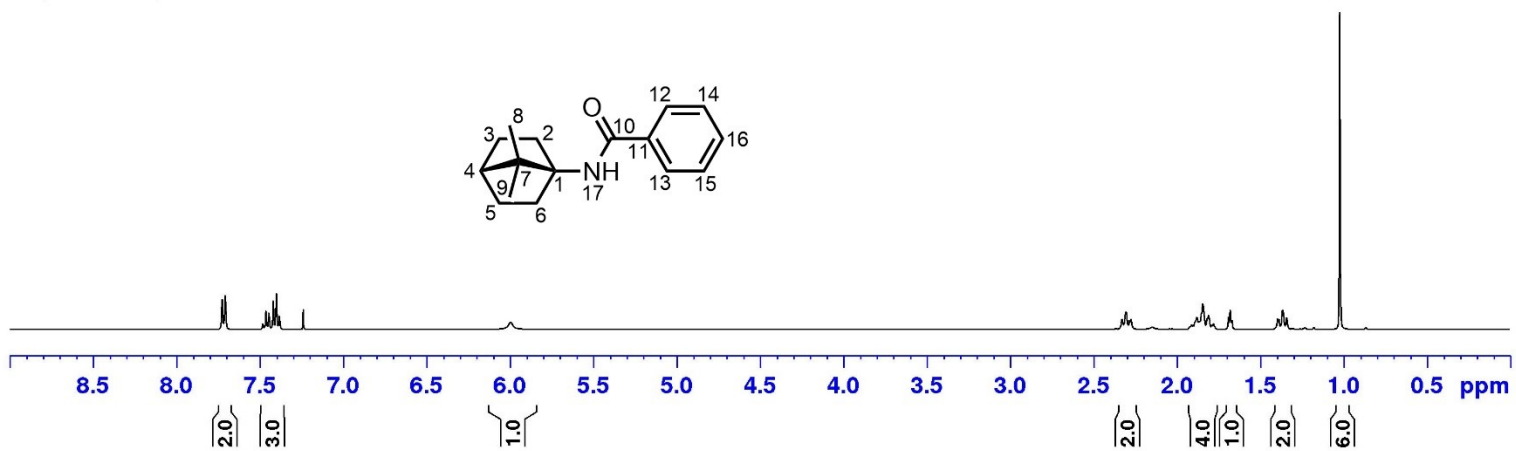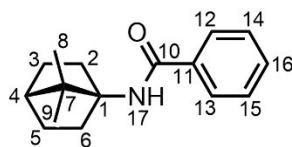

# Compound 13f

$^{13}\text{C}$ , JMOD,  $\text{CDCl}_3$

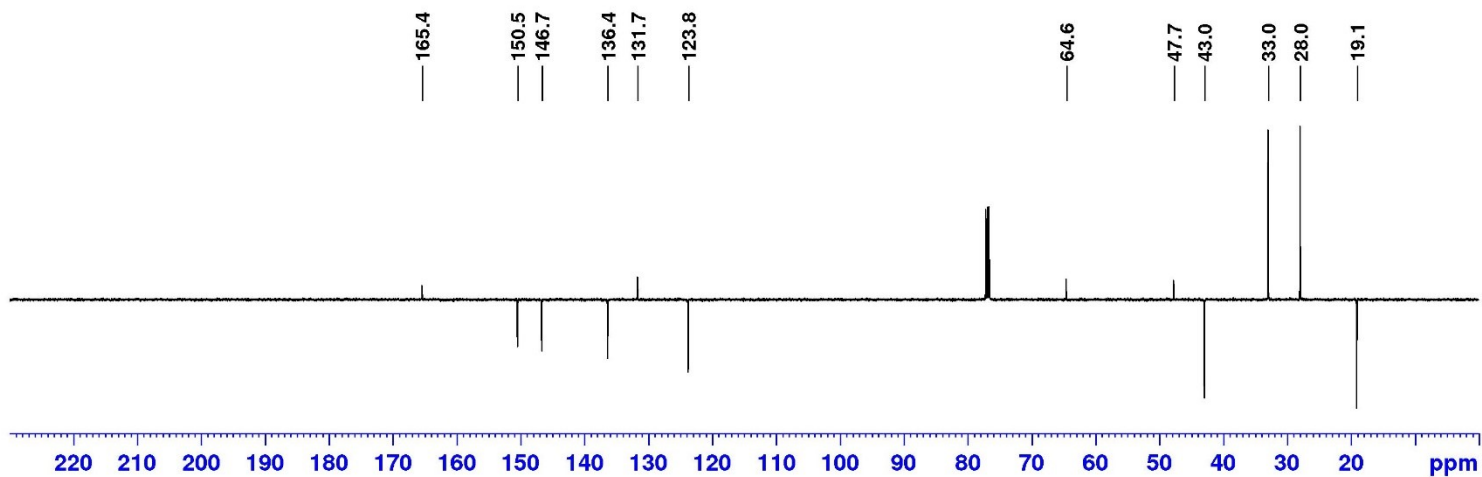

$^1\text{H}$ , 300 MHz,  $\text{CDCl}_3$

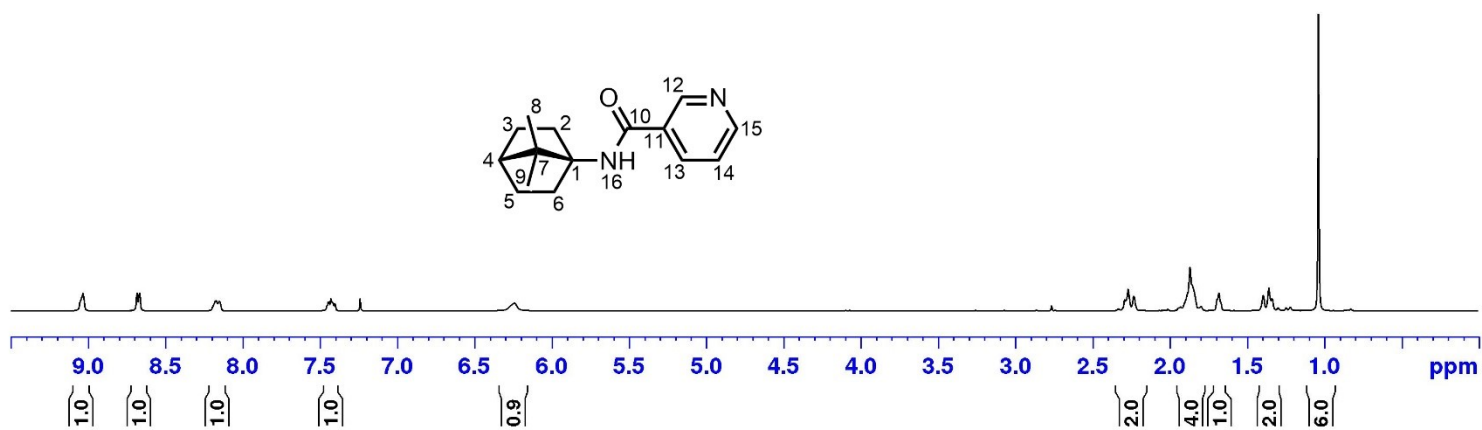

# Compound 13g

<sup>13</sup>C, JMOD, CDCl<sub>3</sub>

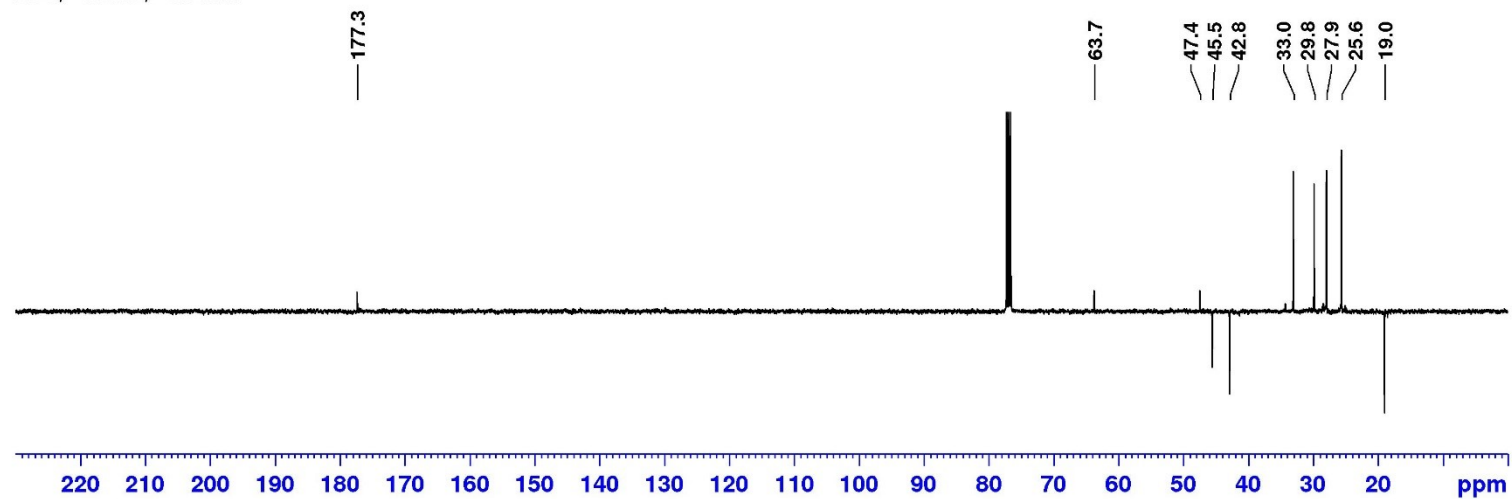

<sup>1</sup>H, 300 MHz, CDCl<sub>3</sub>

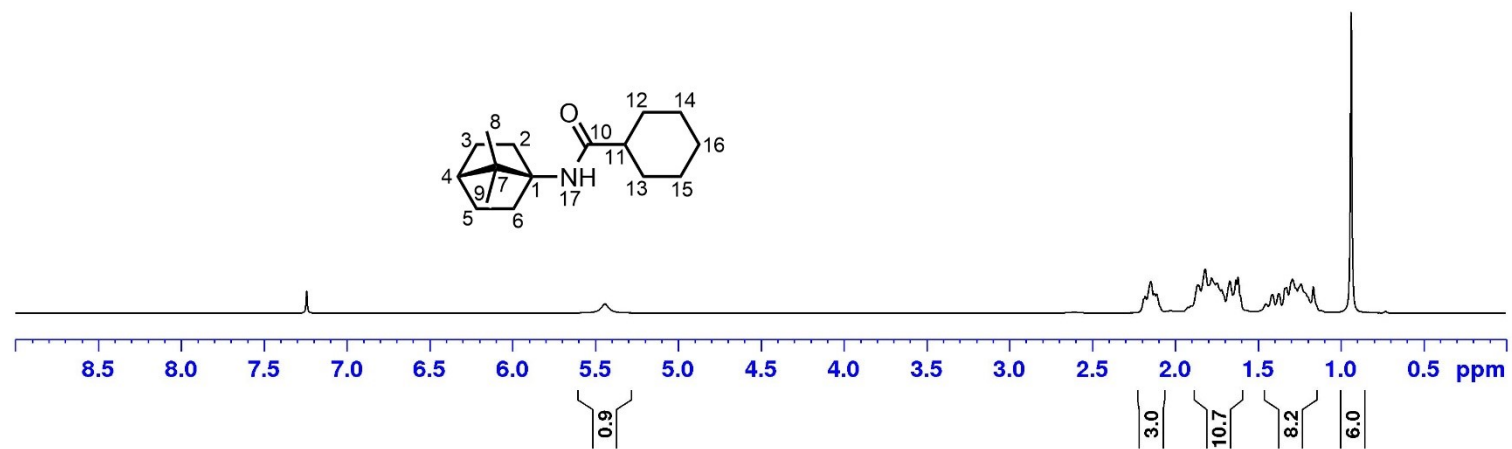

# Compound 13h

$^{13}\text{C}$ , JMOD,  $\text{CDCl}_3$

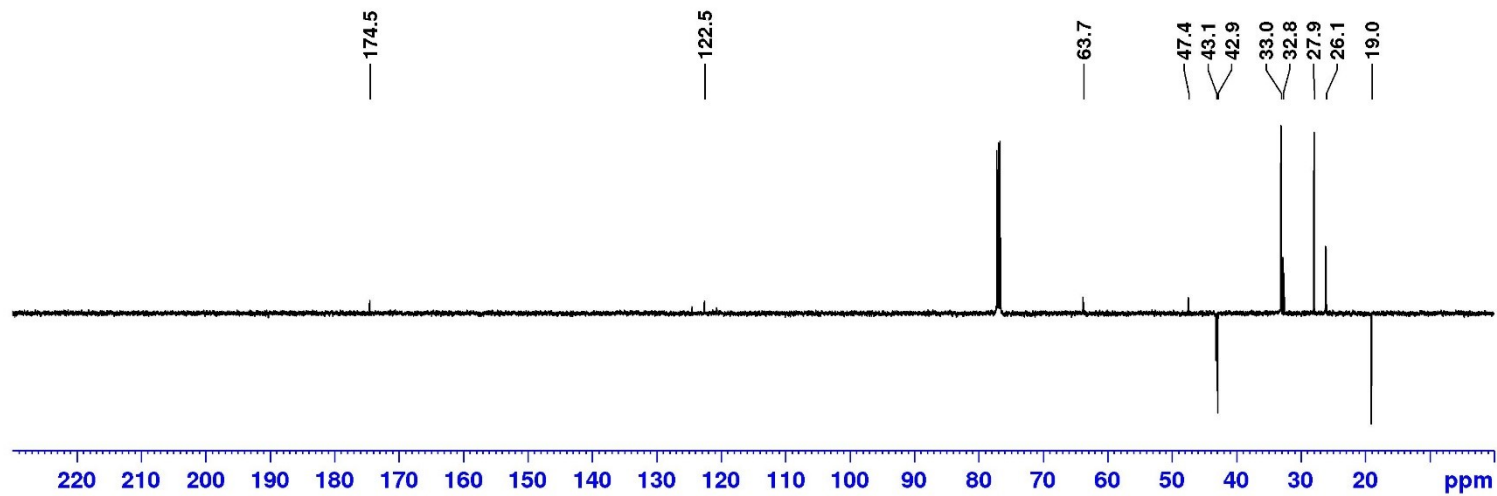

$^1\text{H}$ , 400 MHz,  $\text{CDCl}_3$

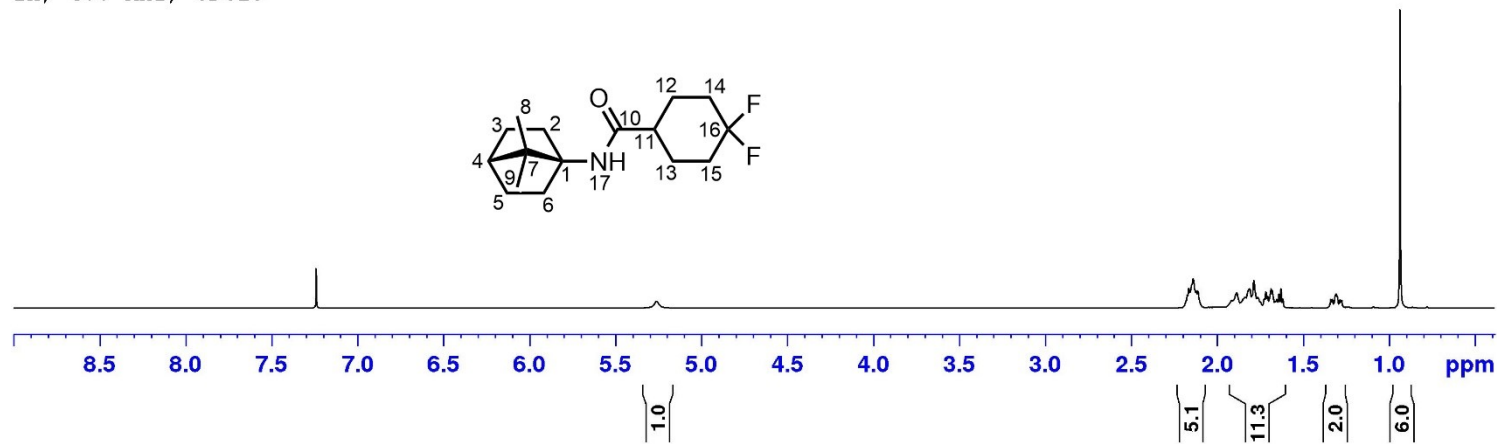

# Compound 15a

$^{13}\text{C}$ , JMOD,  $\text{CDCl}_3$

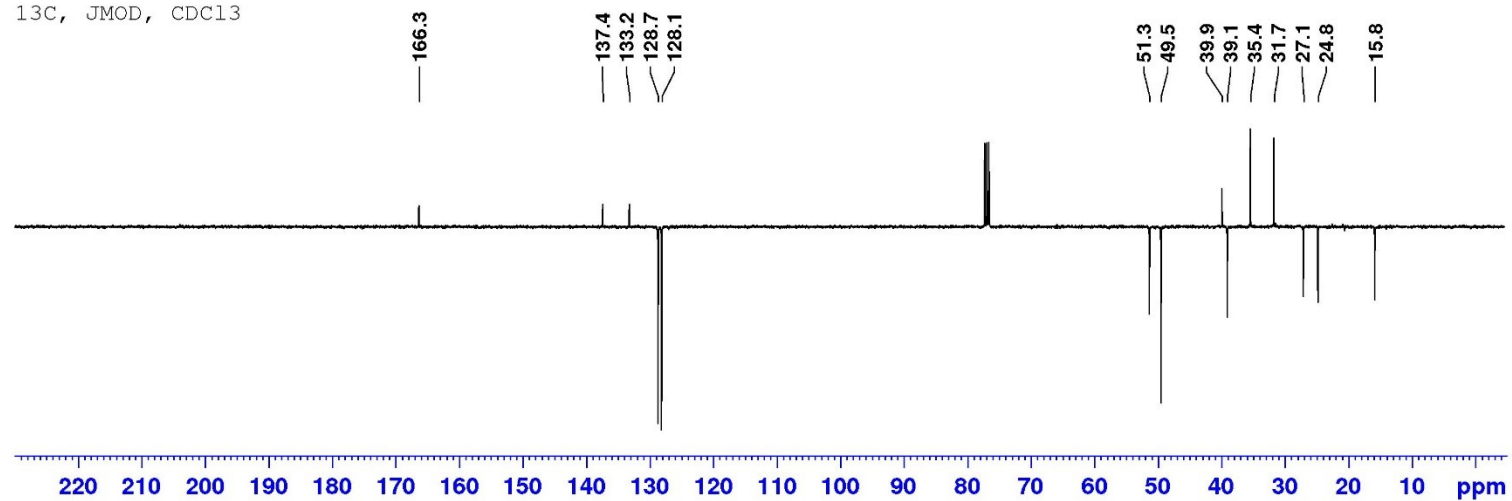

$^1\text{H}$ , 400 MHz,  $\text{CDCl}_3$

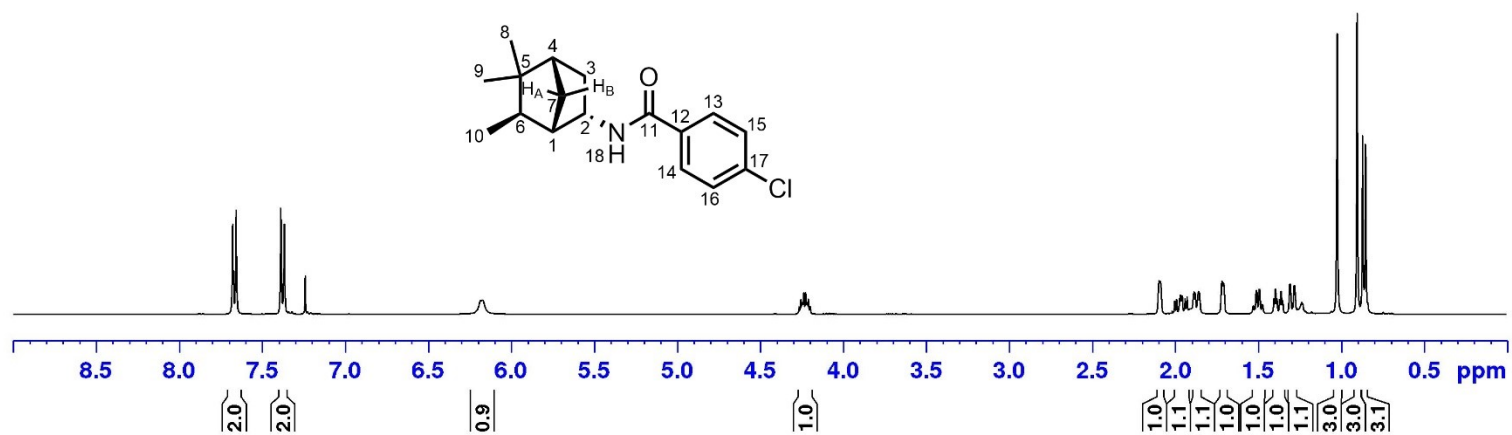

# Compound 15b

$^{13}\text{C}$ , JMOD,  $\text{CDCl}_3$

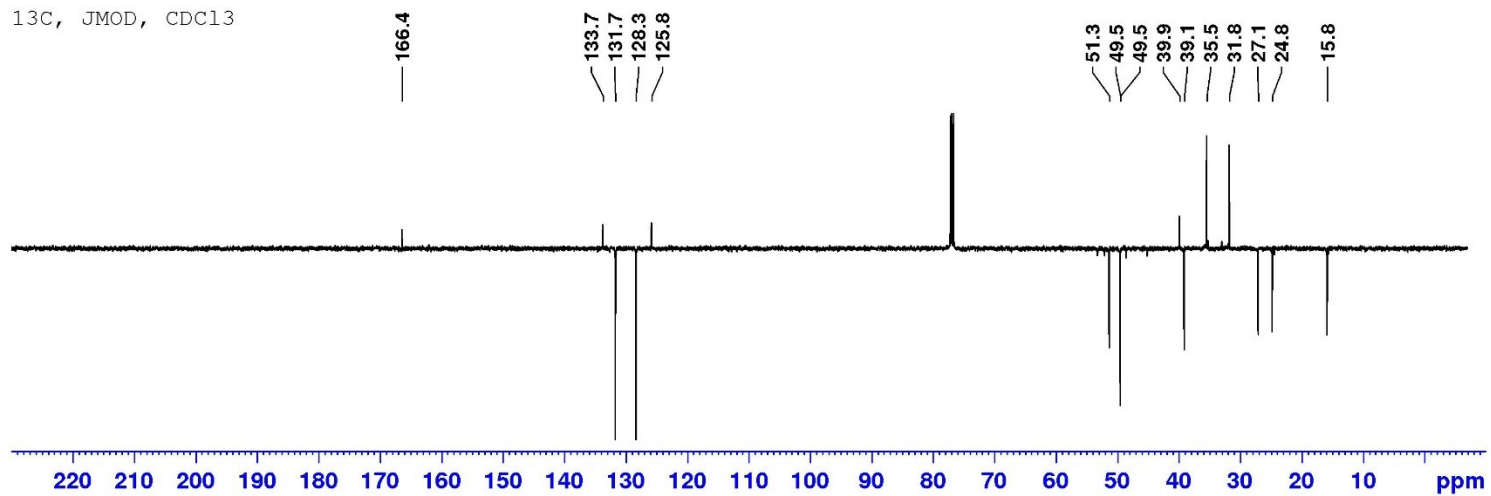

$^1\text{H}$ , 300 MHz,  $\text{CDCl}_3$

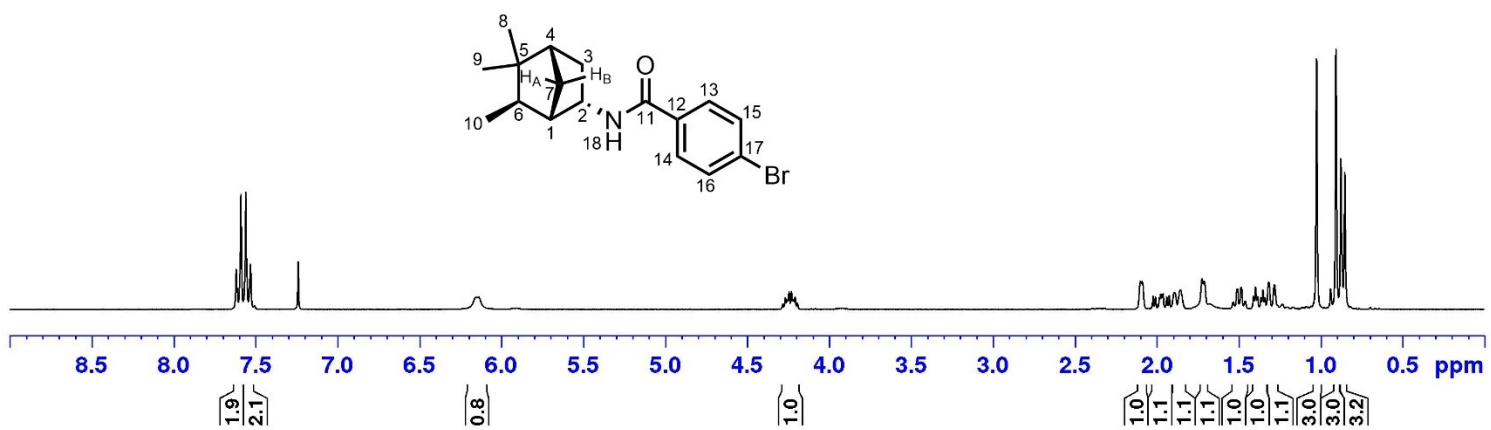

# Compound 15c

$^{13}\text{C}$ , JMOD,  $\text{CDCl}_3$

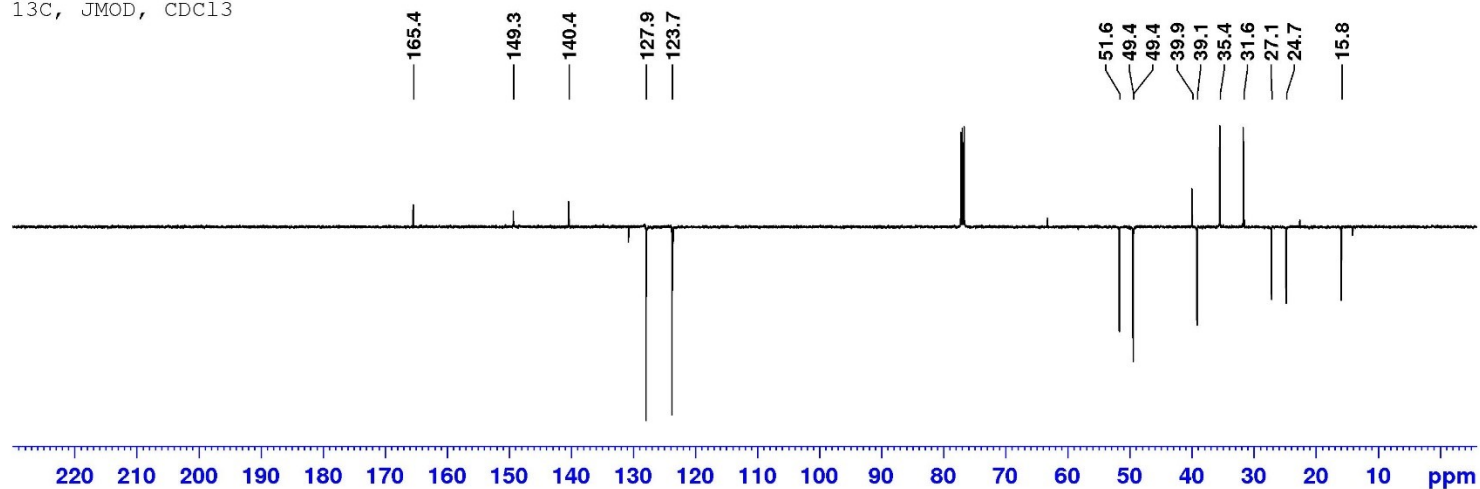

$^1\text{H}$ , 400 MHz,  $\text{CDCl}_3$

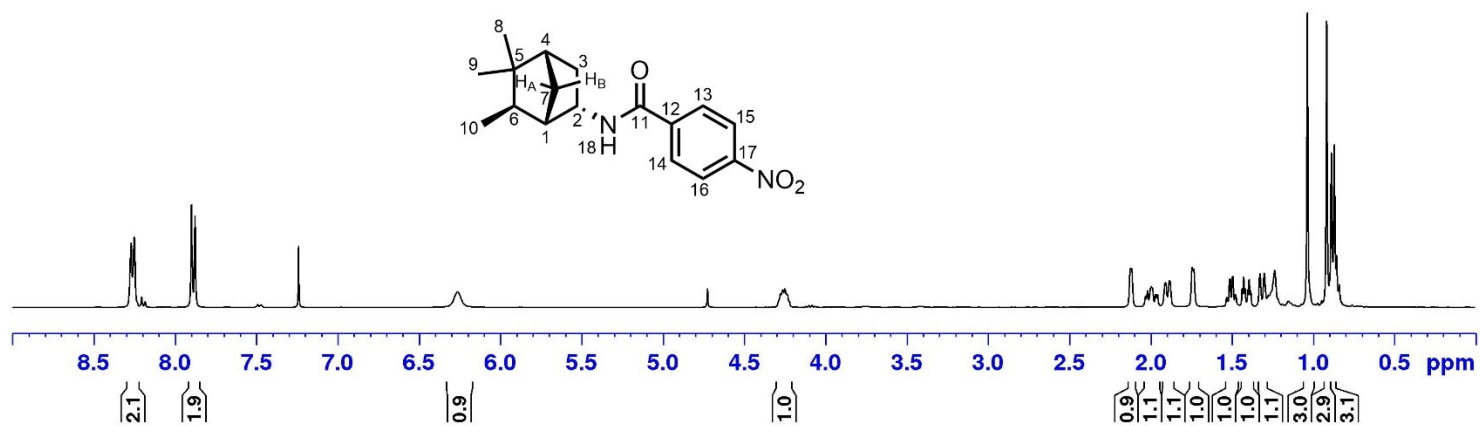

# Compound 15d

$^{13}\text{C}$ , JMOD,  $\text{CDCl}_3$

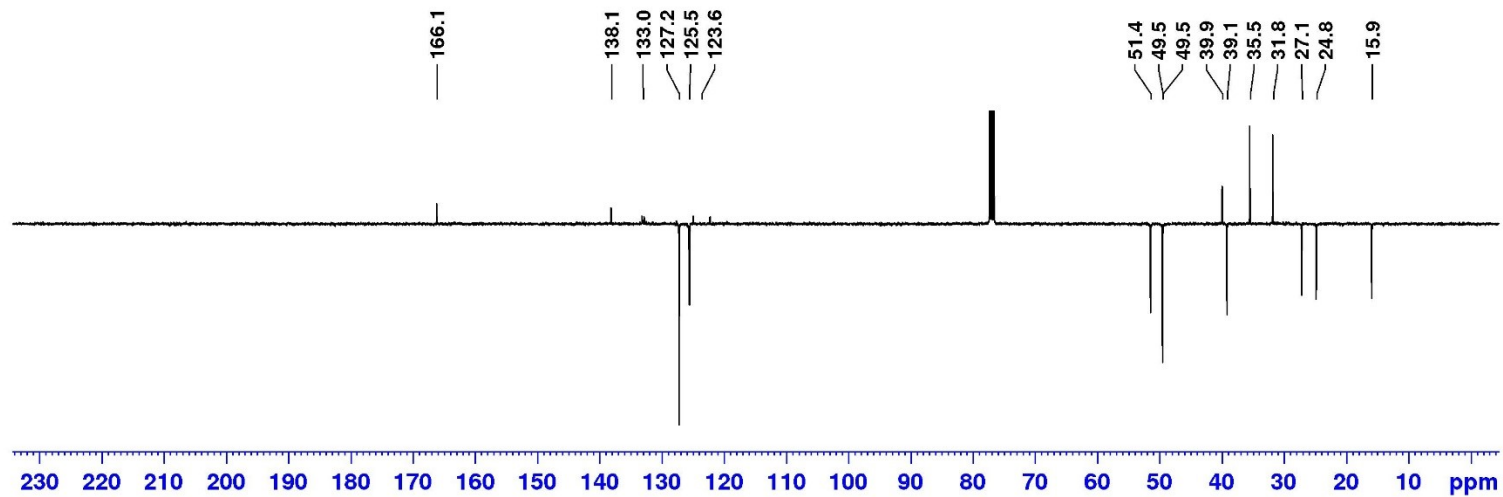

$^1\text{H}$ , 400 MHz,  $\text{CDCl}_3$

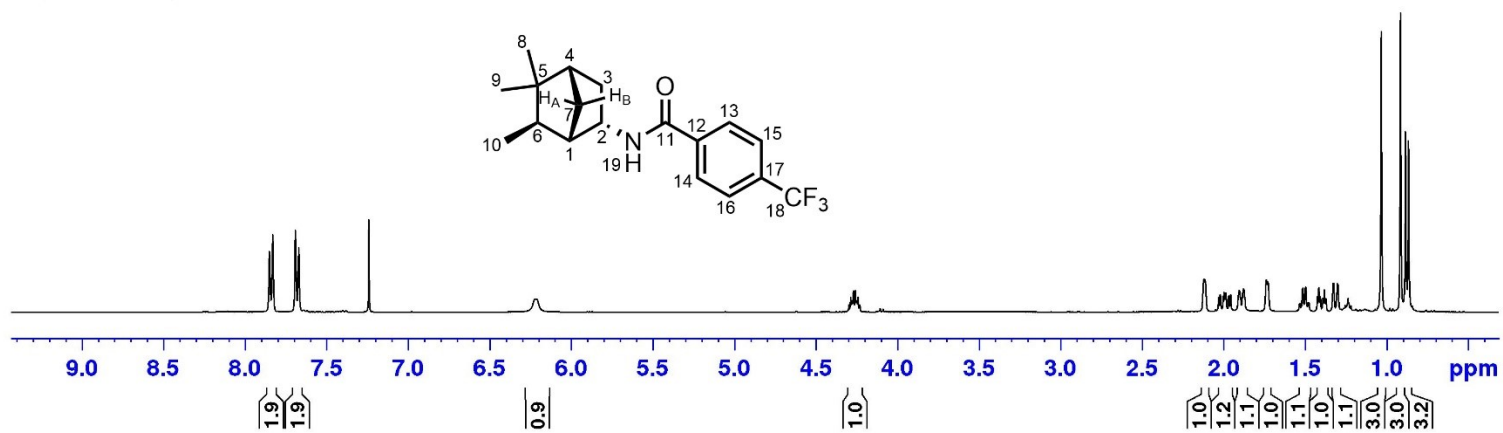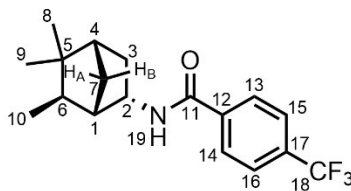

# Compound 15e

<sup>13</sup>C, JMOD, CDCl<sub>3</sub>

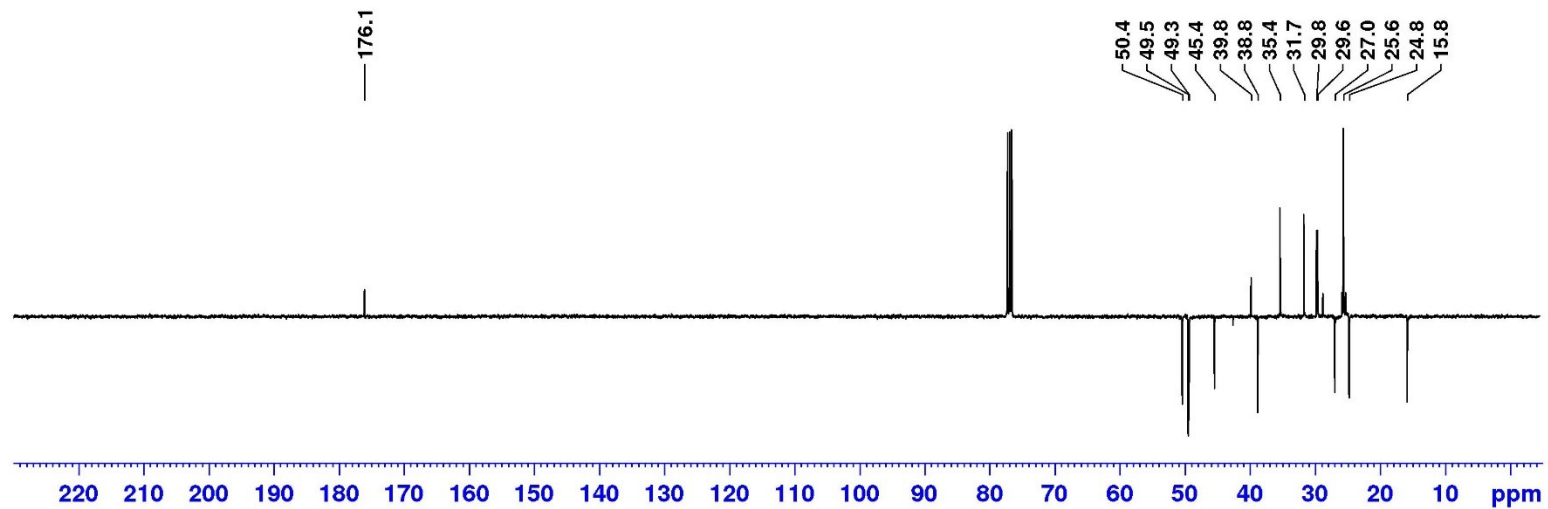

<sup>1</sup>H, 300 MHz, CDCl<sub>3</sub>

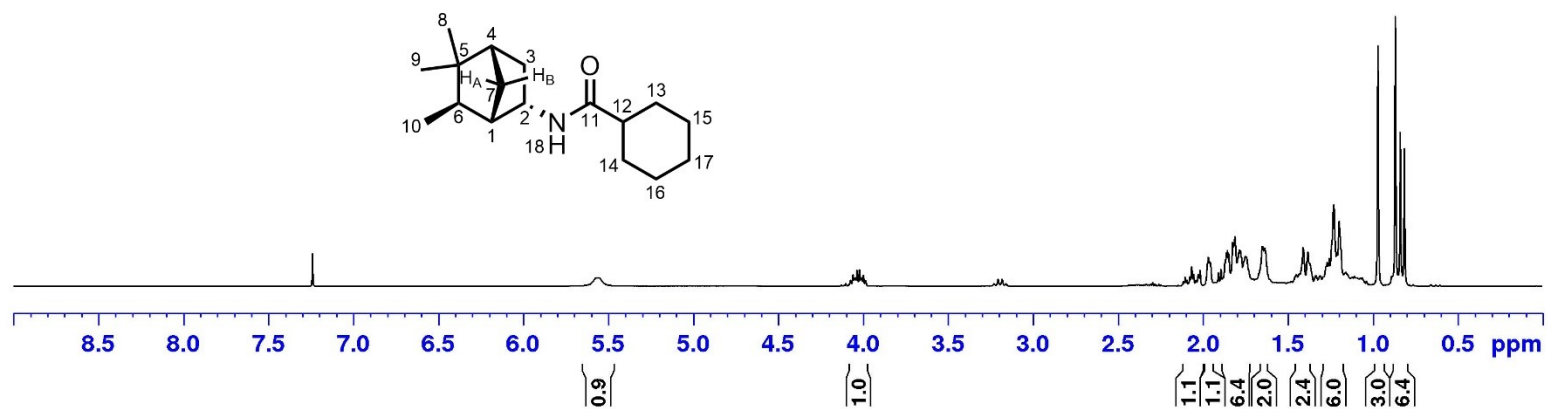

# Compound 15f

$^{13}\text{C}$ , JMOD,  $\text{CDCl}_3$

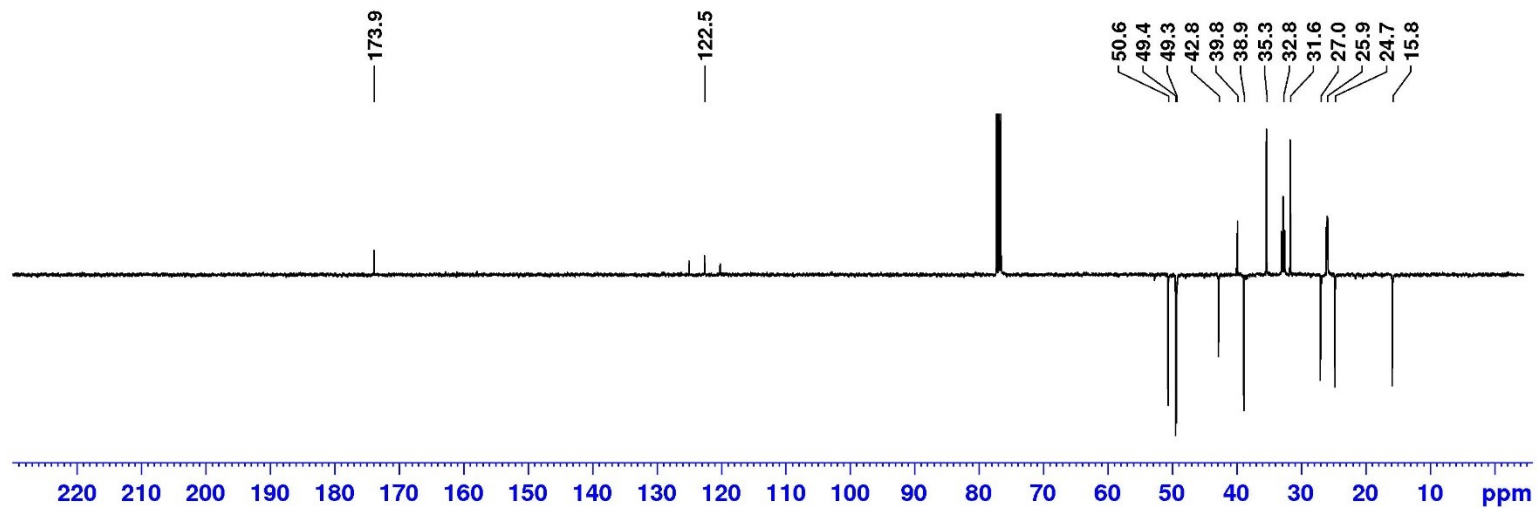

$^1\text{H}$ , 300 MHz,  $\text{CDCl}_3$

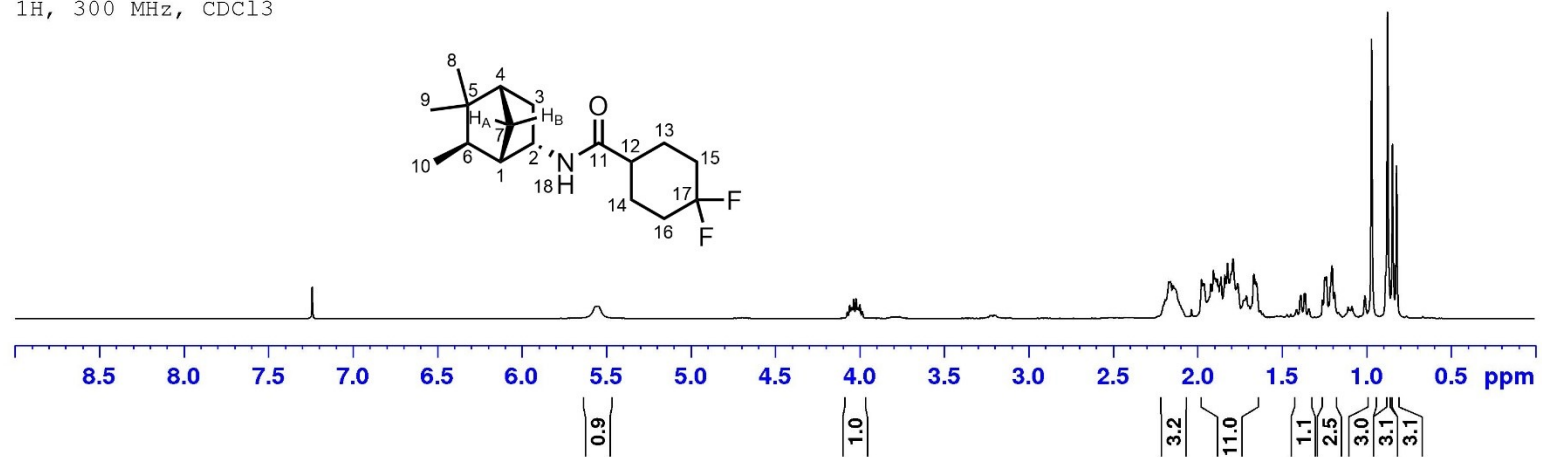

# Compound 17a

<sup>13</sup>C, JMOD, CDCl<sub>3</sub>

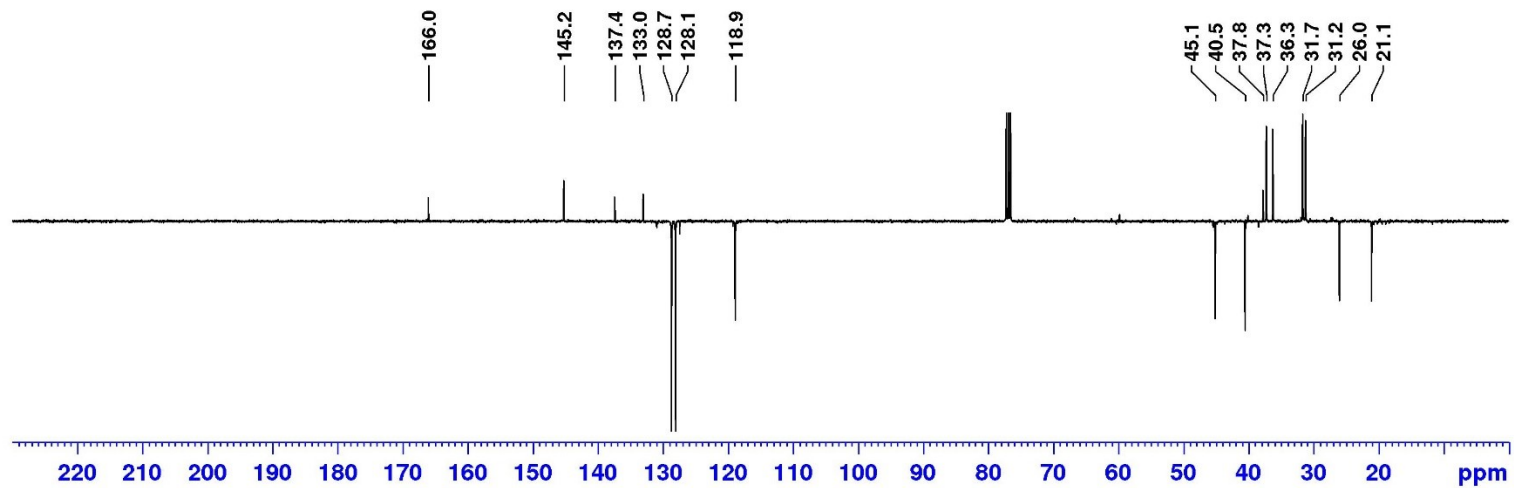

<sup>1</sup>H, 500 MHz, CDCl<sub>3</sub>

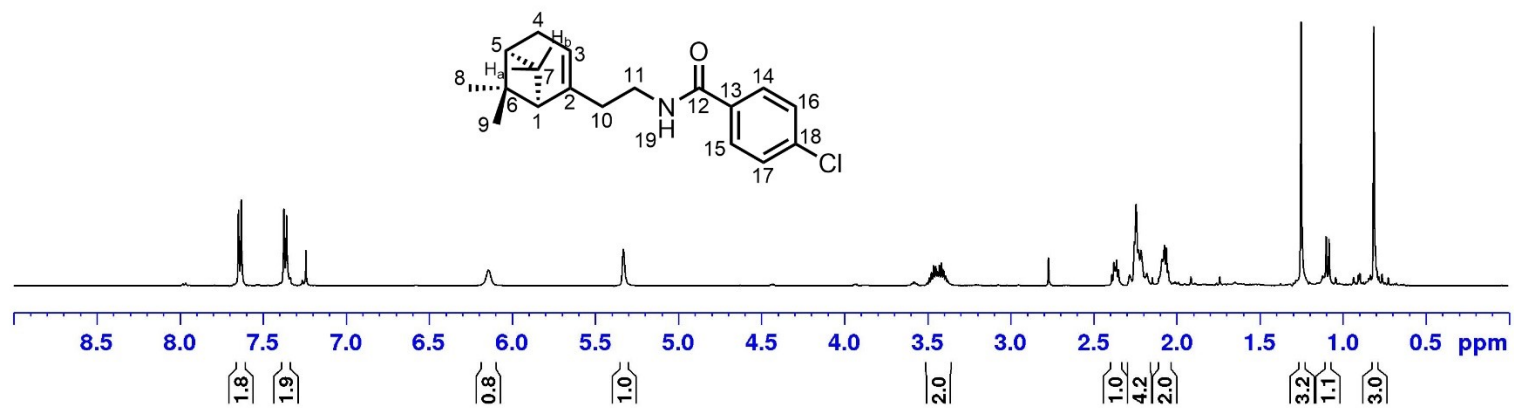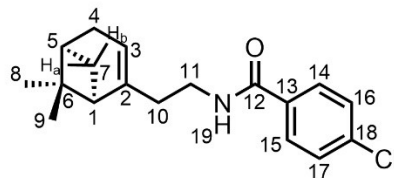

# Compound 17b

<sup>13</sup>C, JMOD, CDCl<sub>3</sub>

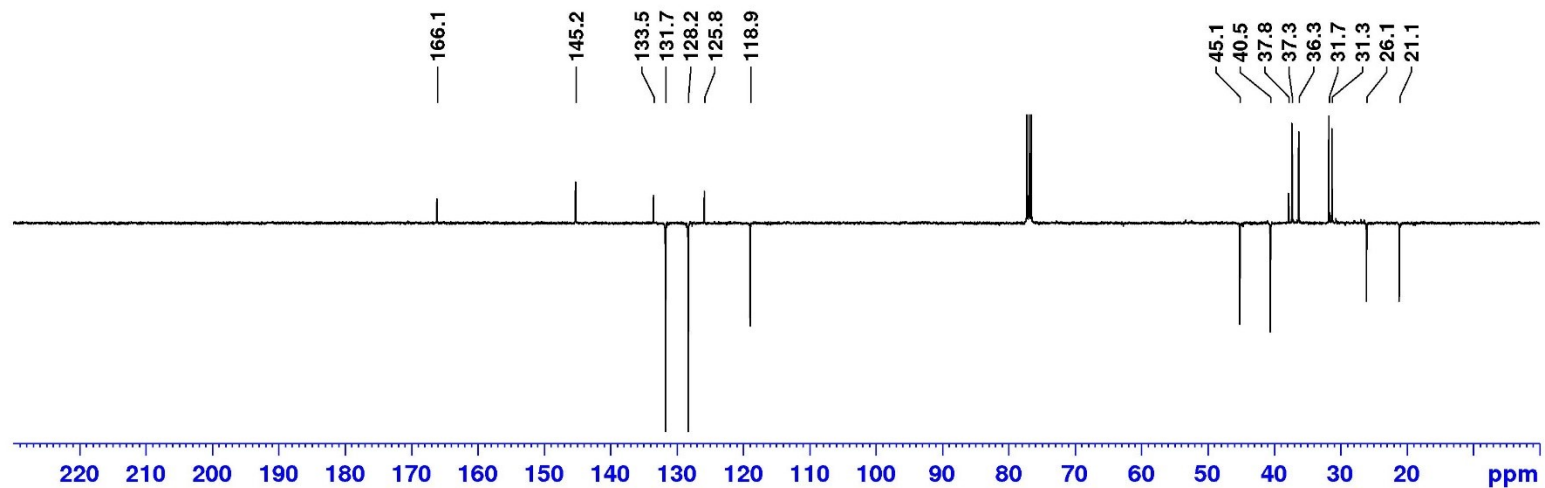

<sup>1</sup>H, 400 MHz, CDCl<sub>3</sub>

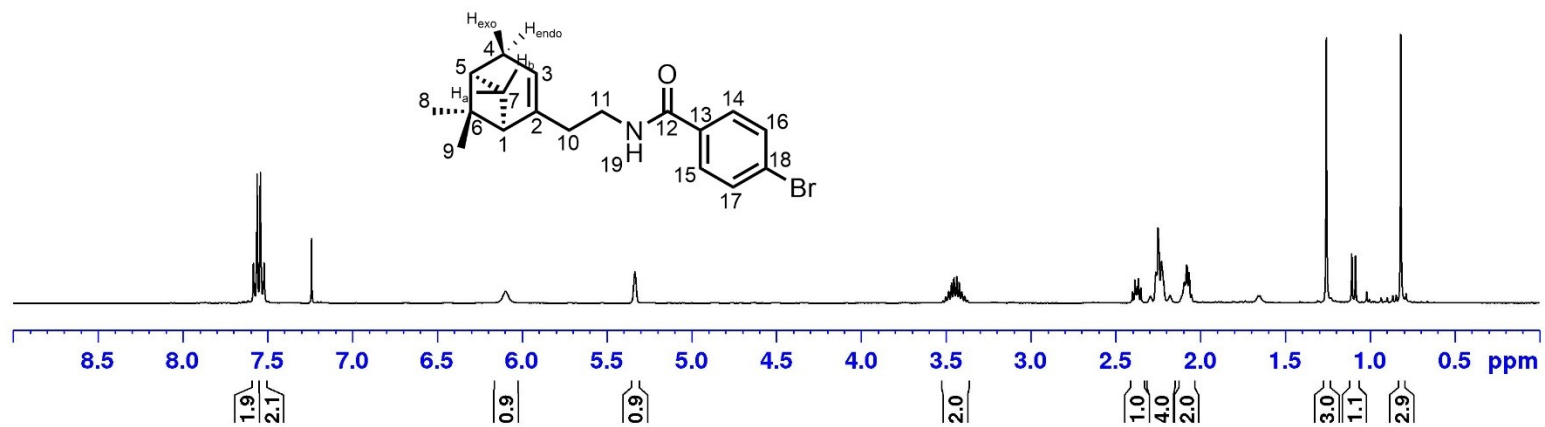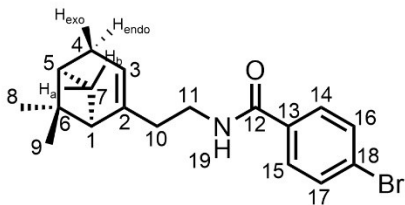

# Compound 17c

<sup>13</sup>C, JMOD, CDCl<sub>3</sub>

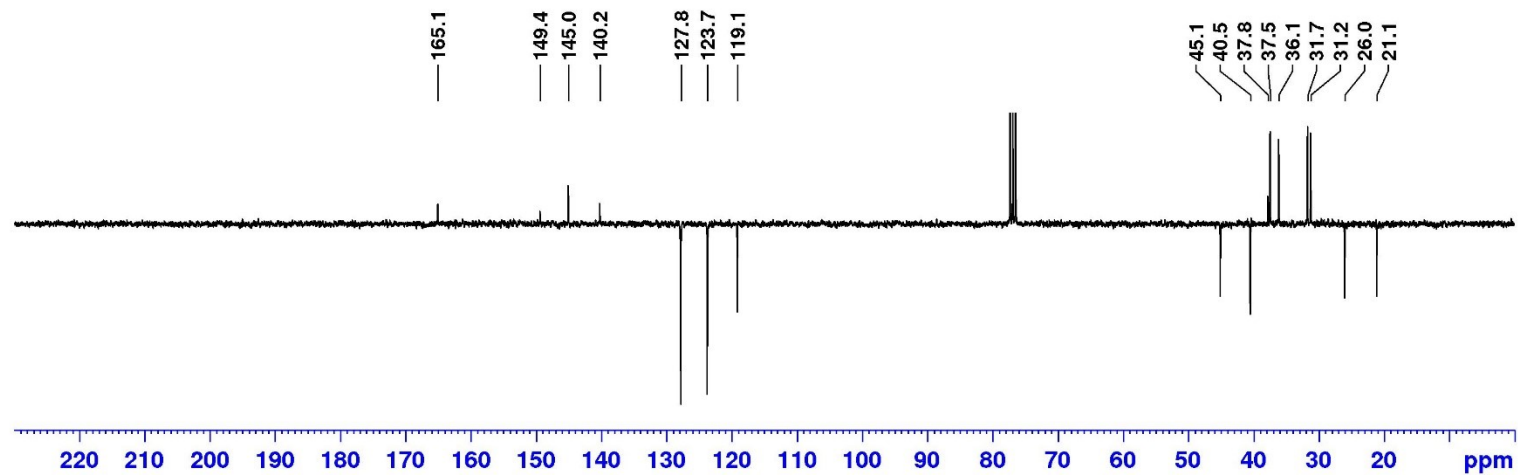

<sup>1</sup>H, 300 MHz, CDCl<sub>3</sub>

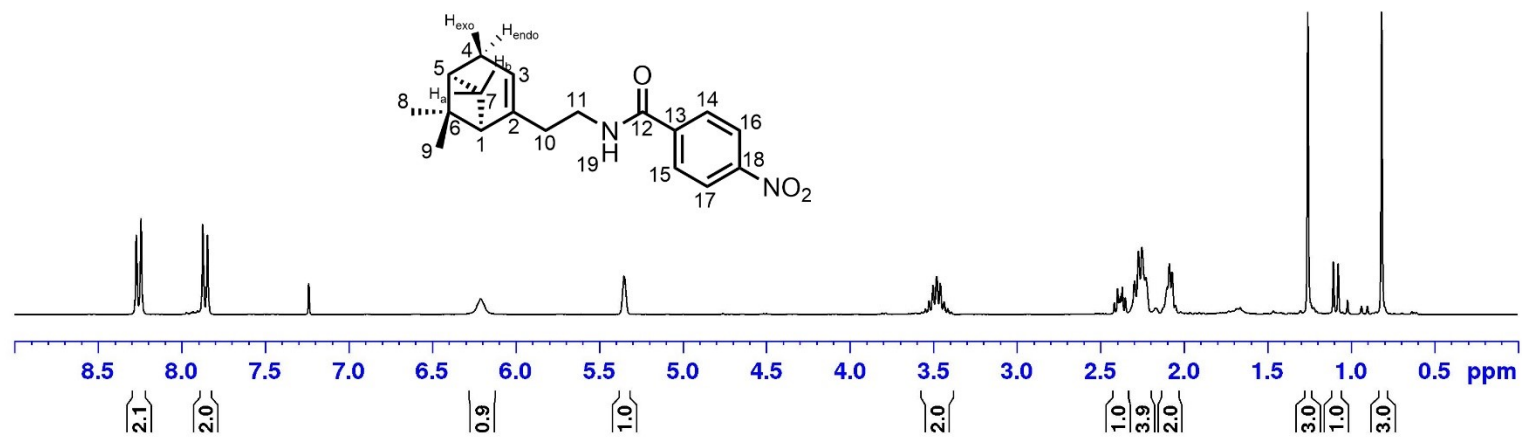

# Compound 17d

<sup>13</sup>C, JMOD, CDCl<sub>3</sub>

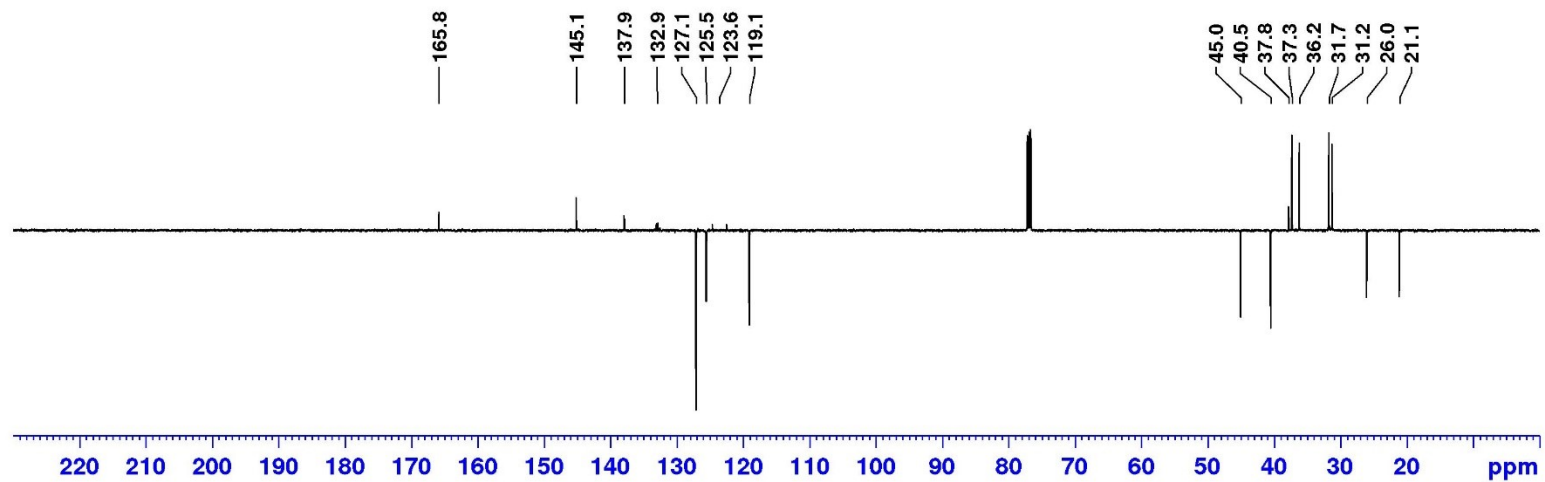

<sup>1</sup>H, 400 MHz, CDCl<sub>3</sub>

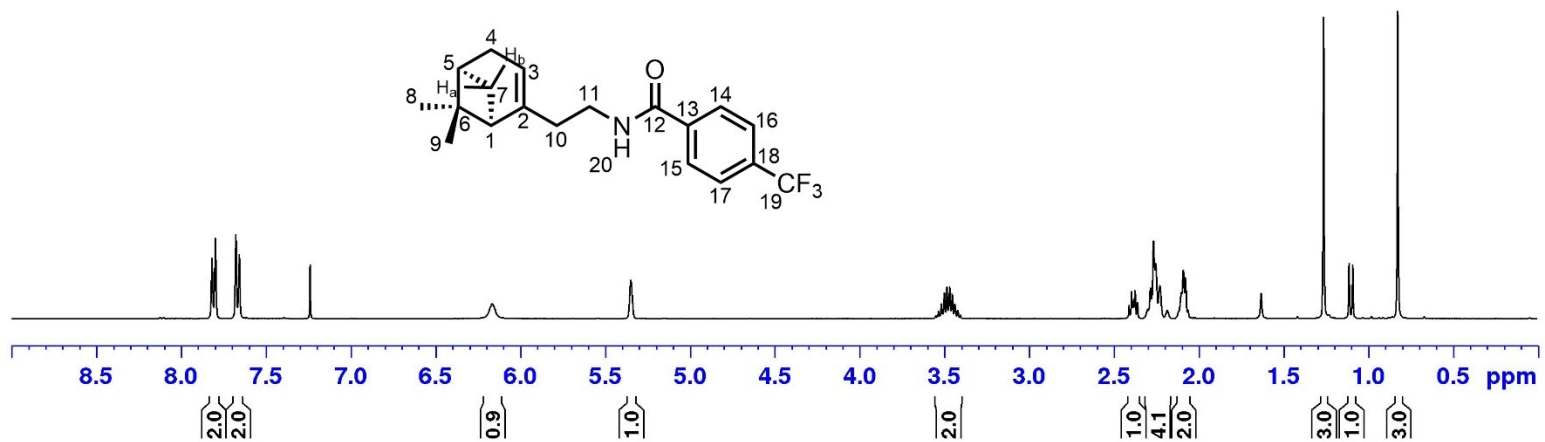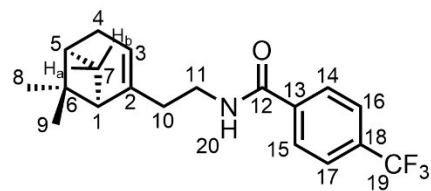

# Compound 17e

<sup>13</sup>C, JMOD, CDCl<sub>3</sub>

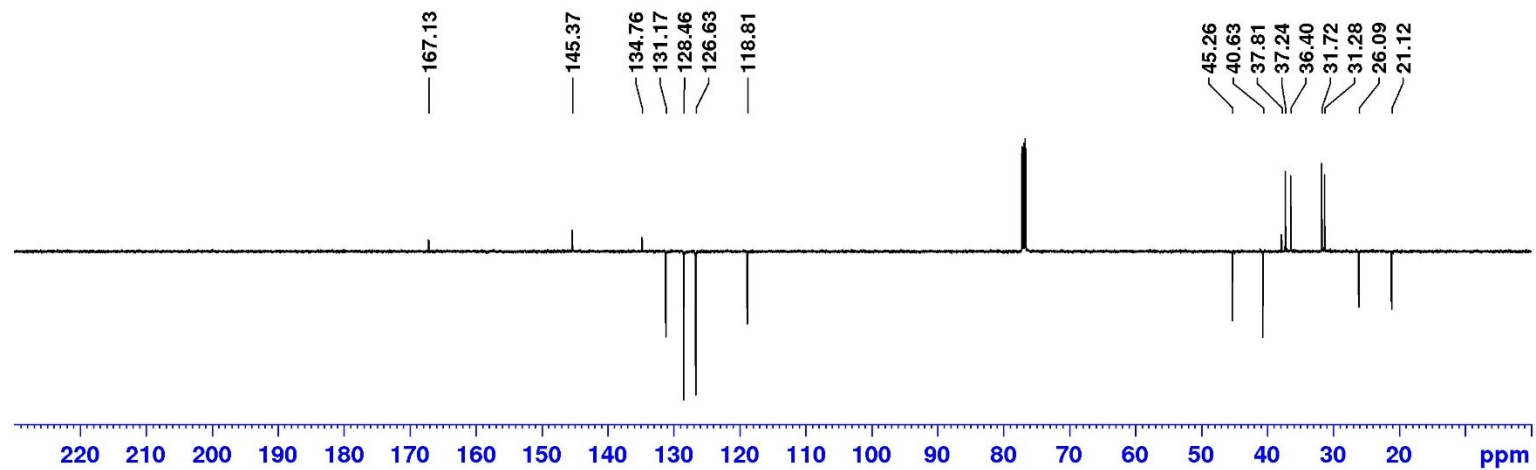

<sup>1</sup>H, 300 MHz, CDCl<sub>3</sub>

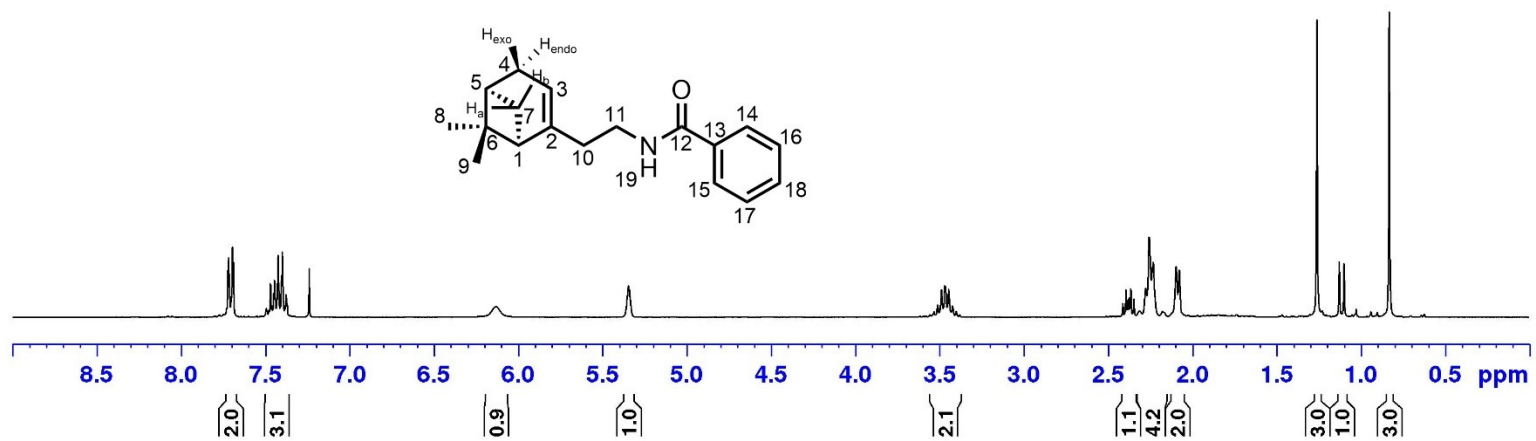

# Compound 17f

<sup>13</sup>C, JMOD, CDCl<sub>3</sub>

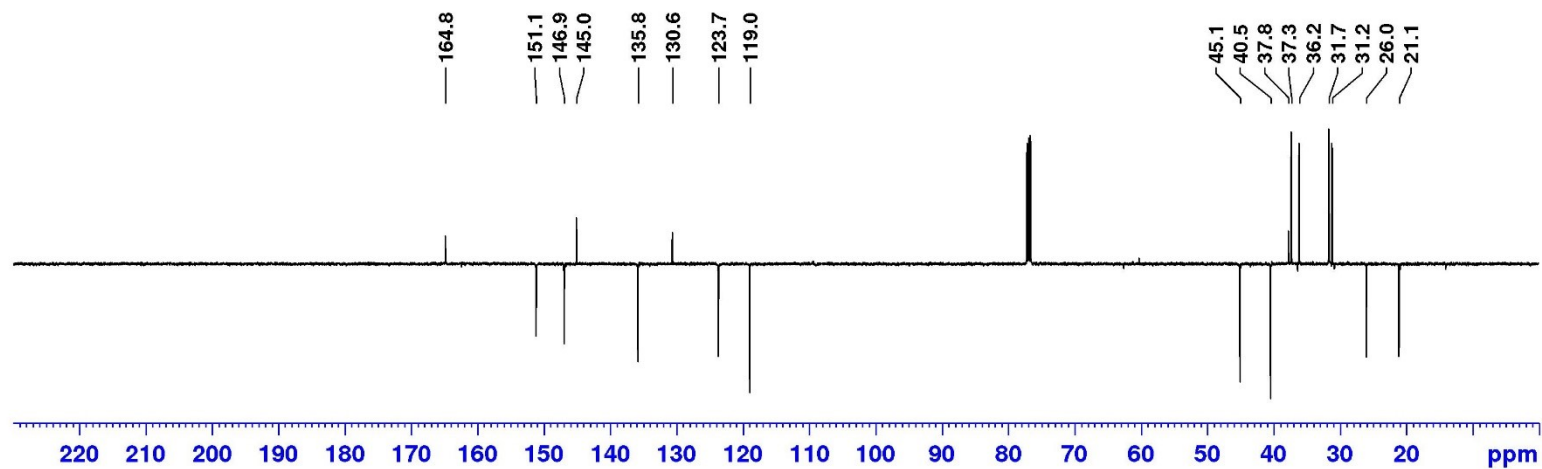

<sup>1</sup>H, 400 MHz, CDCl<sub>3</sub>

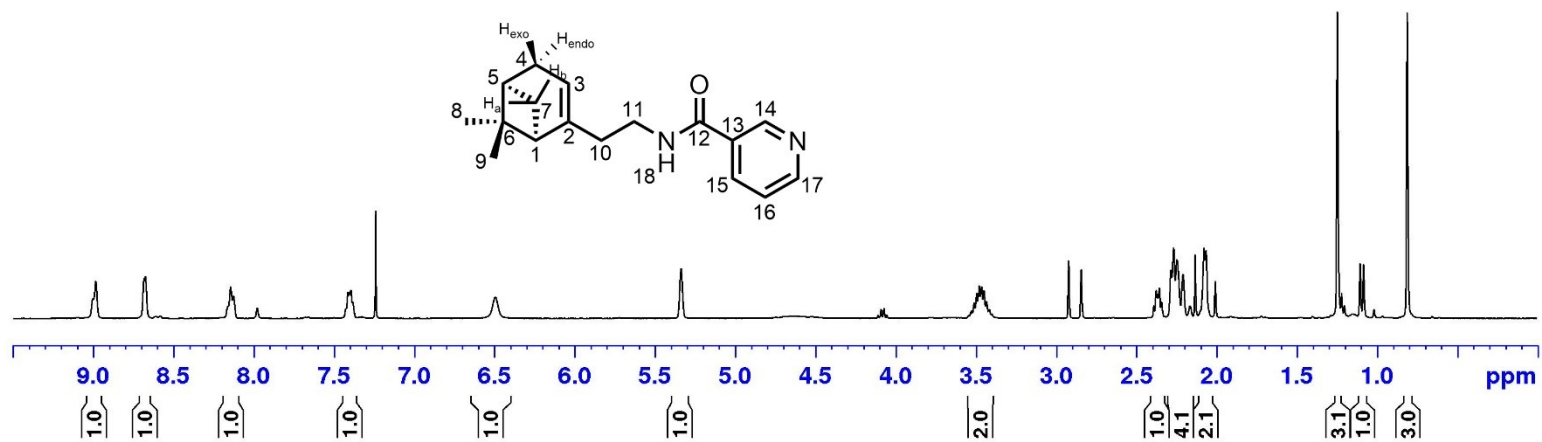

# Compound 17g

$^{13}\text{C}$ , JMOD,  $\text{CDCl}_3$

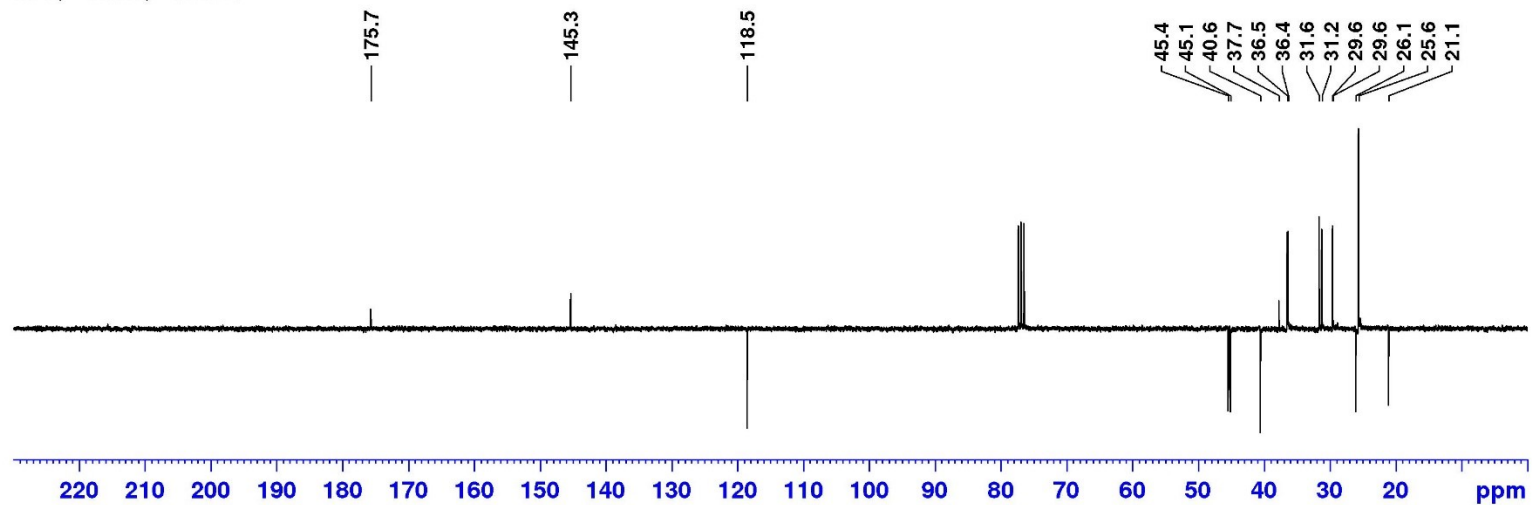

$^1\text{H}$ , 400 MHz,  $\text{CDCl}_3$

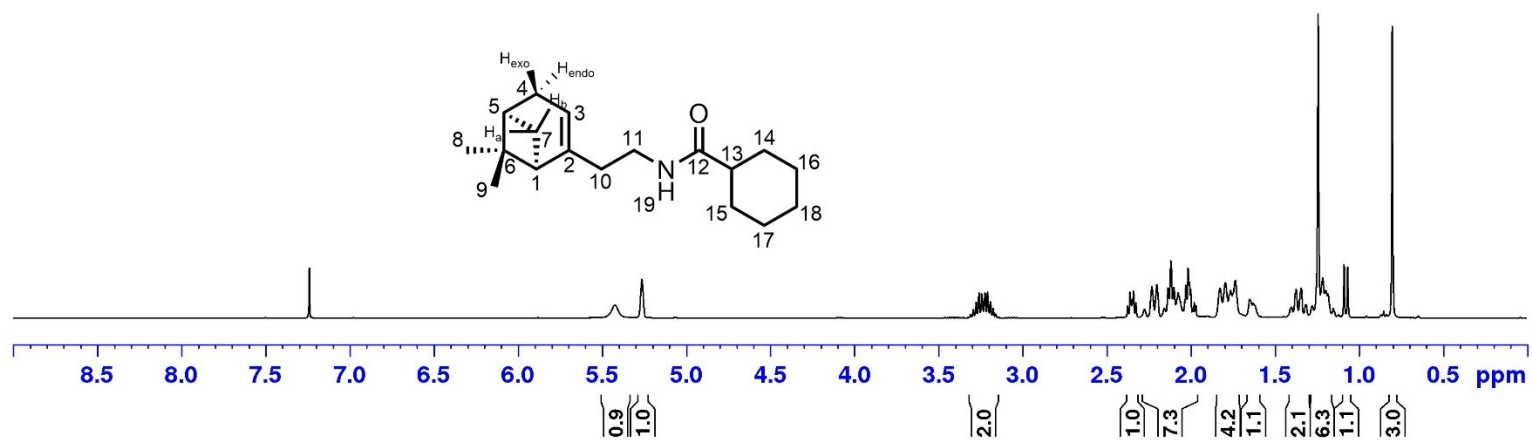

# Compound 17h

<sup>13</sup>C, JMOD, CDCl<sub>3</sub>

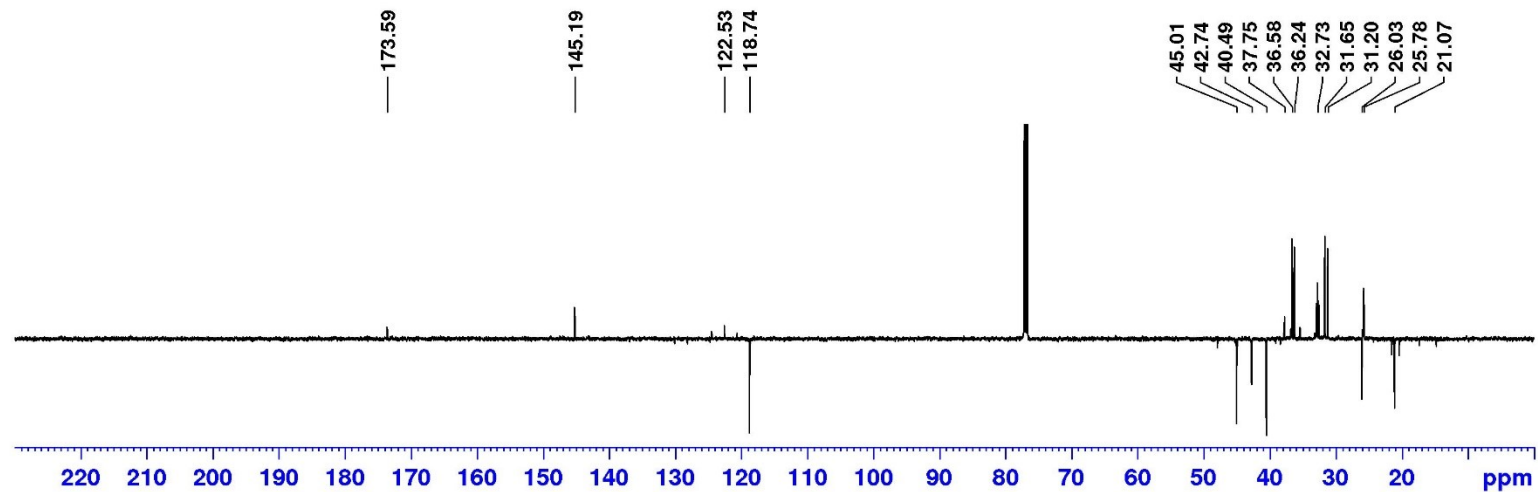

<sup>1</sup>H, 400 MHz, CDCl<sub>3</sub>

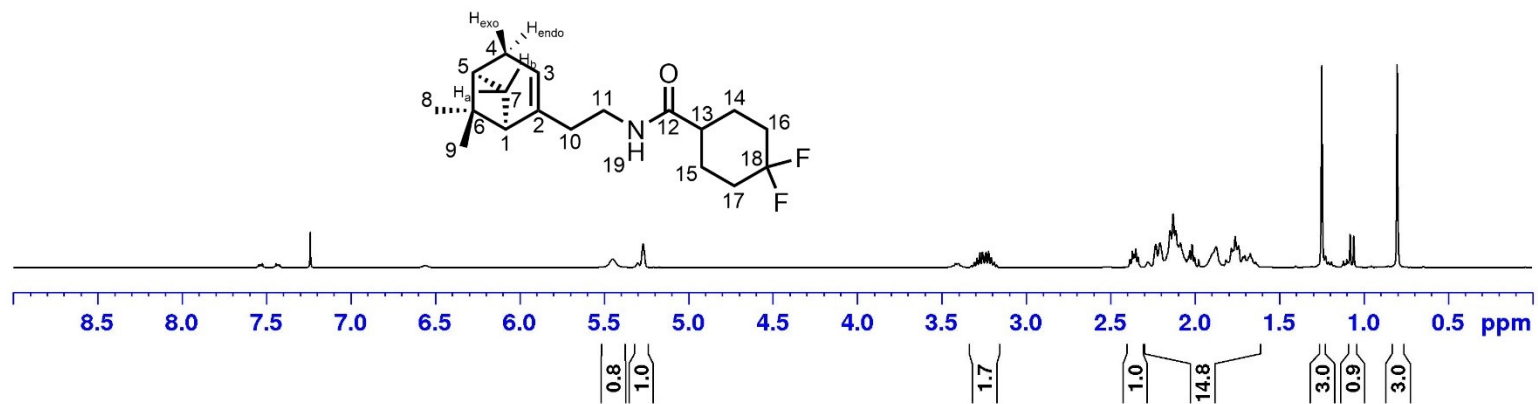

# Compound 20a

<sup>13</sup>C, JMOD, CDC13

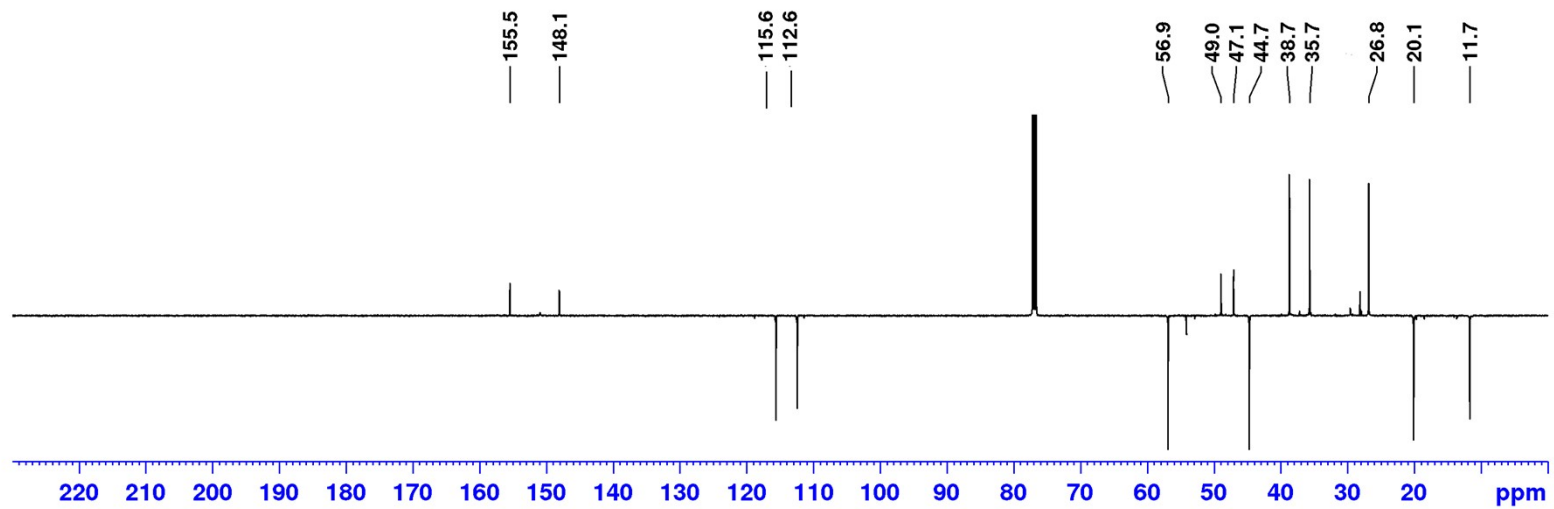

<sup>1</sup>H, 400MHz, CDC13

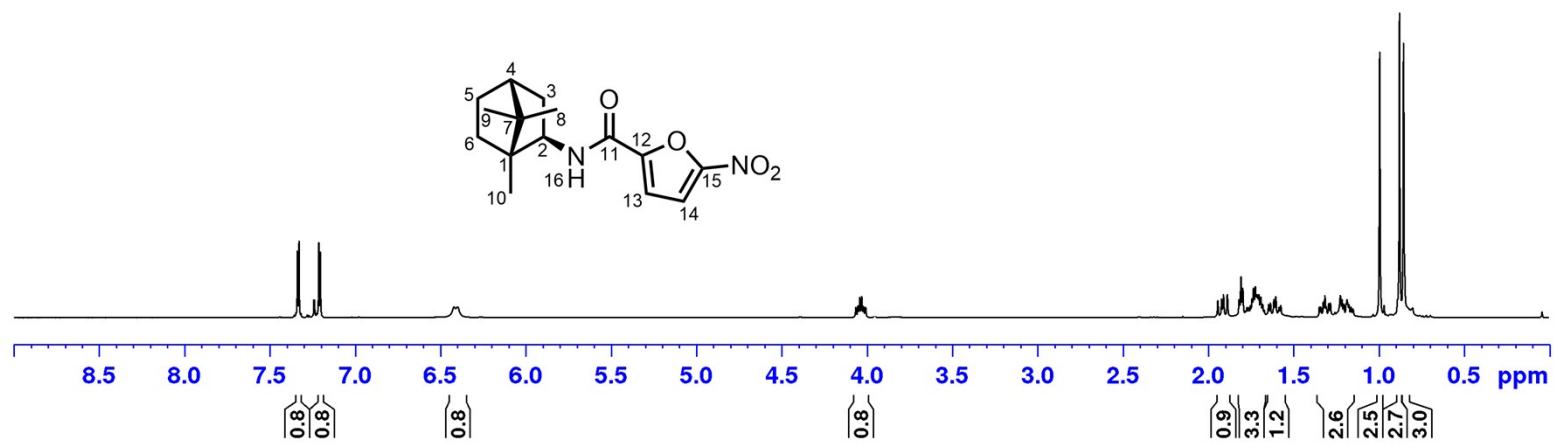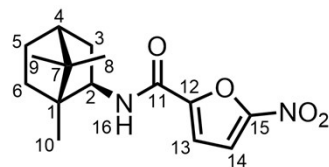

# Compound 20b

<sup>13</sup>C, JMOD, CDCl<sub>3</sub>

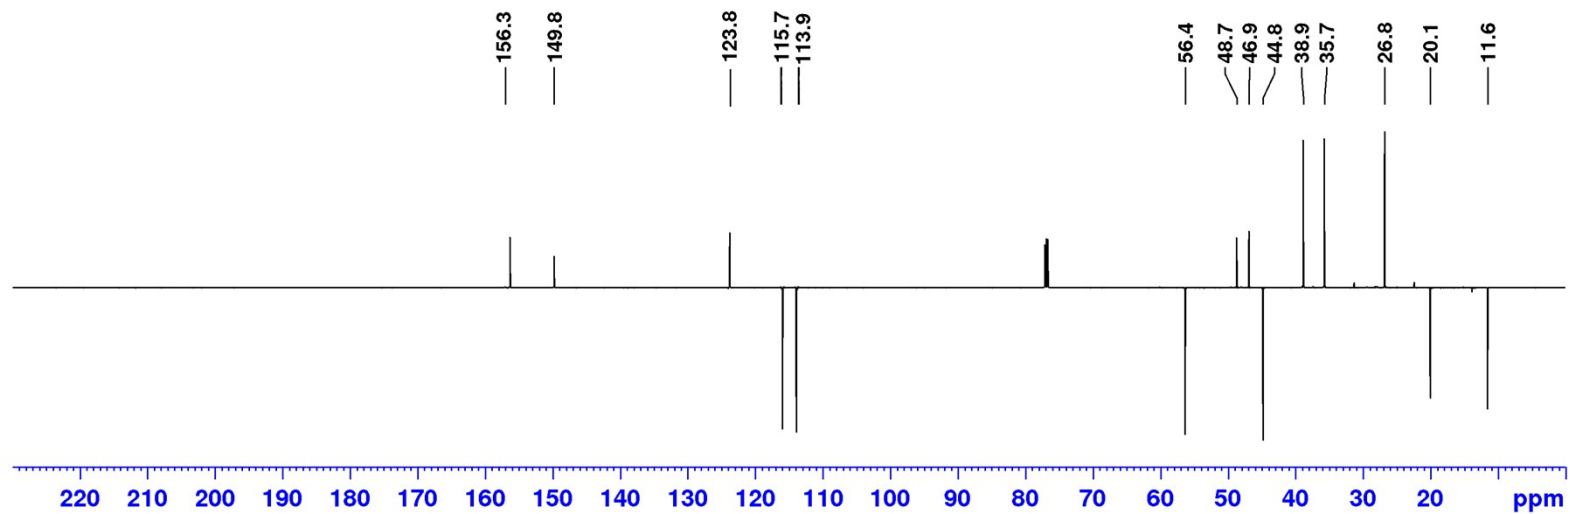

<sup>1</sup>H, 300MHz, CDCl<sub>3</sub>

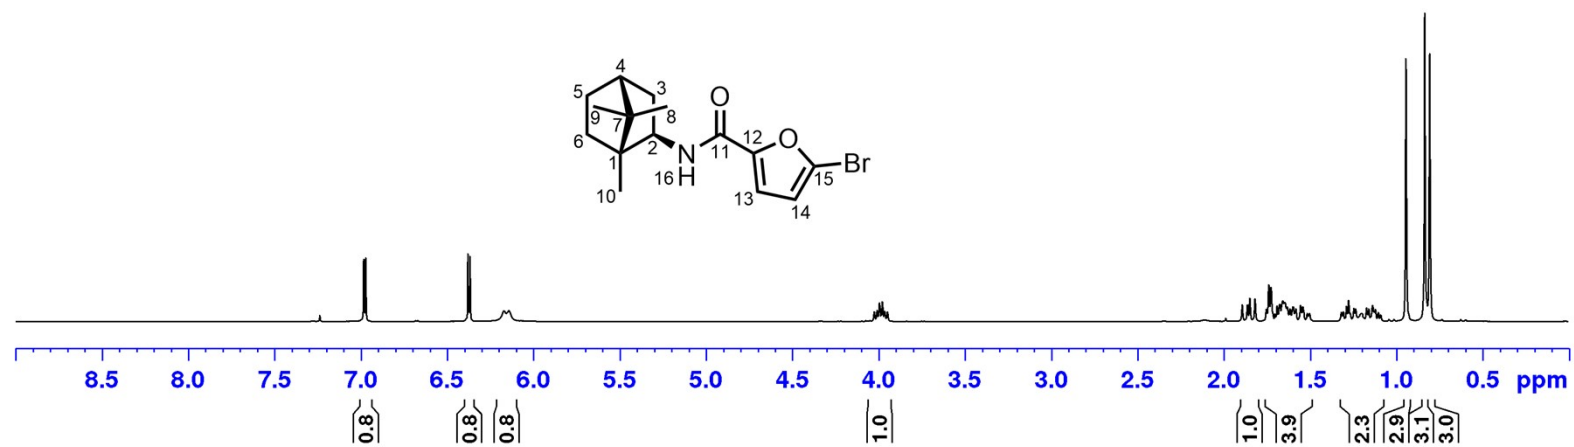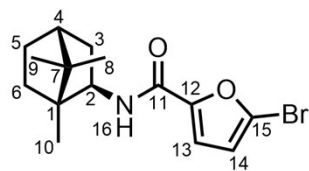

# Compound 20c

$^{13}\text{C}$ , JMOD,  $\text{CDCl}_3$

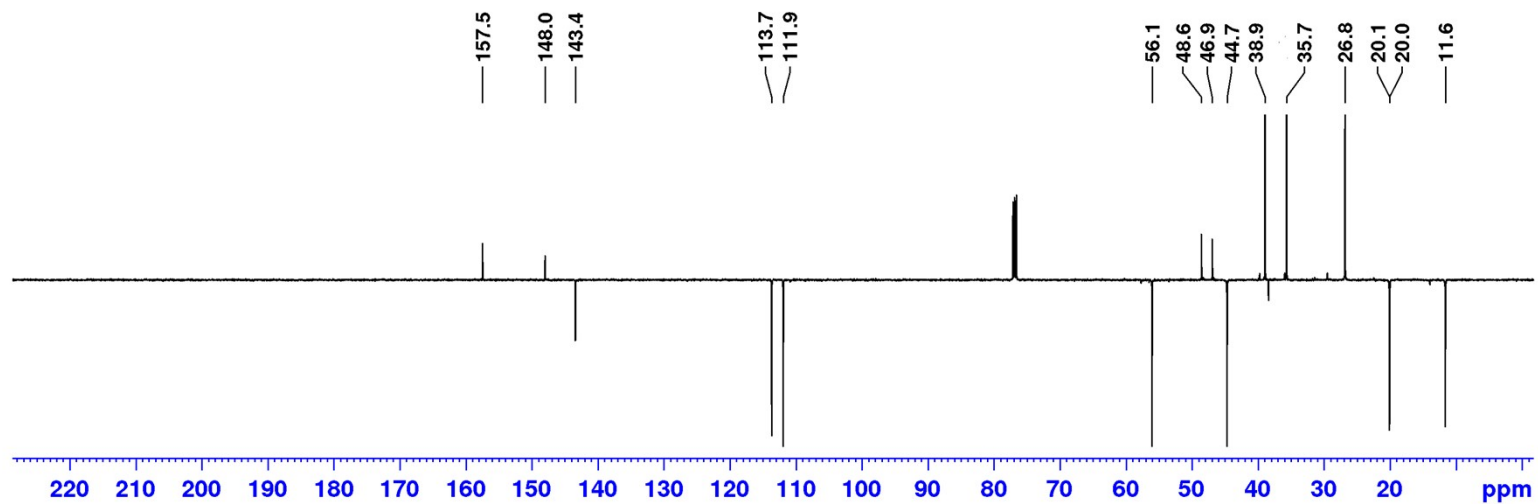

$^1\text{H}$ , 400 MHz,  $\text{CDCl}_3$

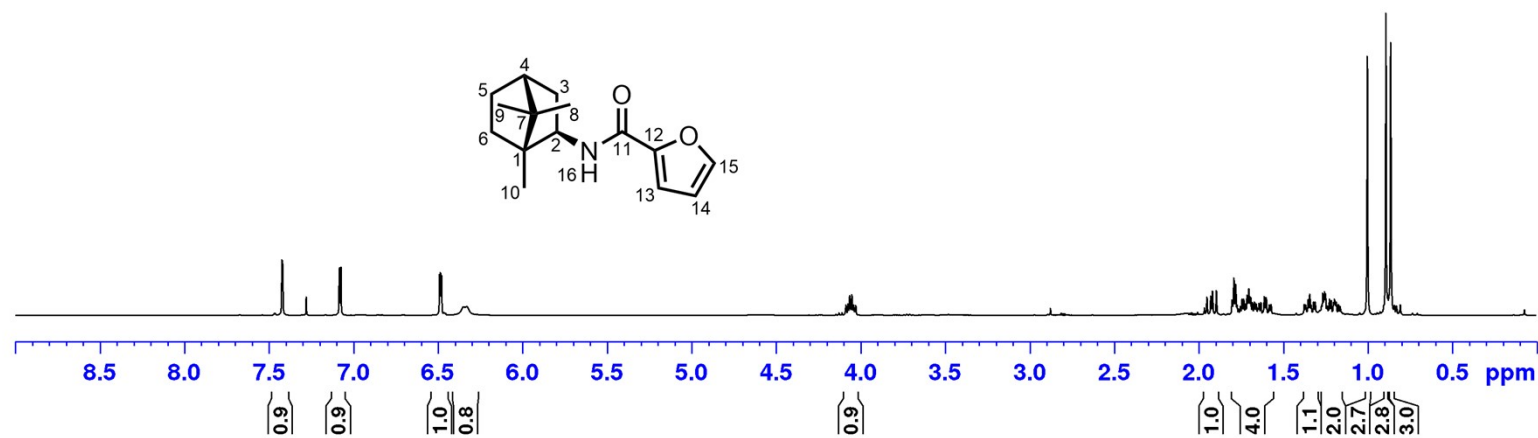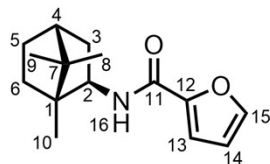

# Compound 20d

<sup>13</sup>C, JMOD, CDCl<sub>3</sub>

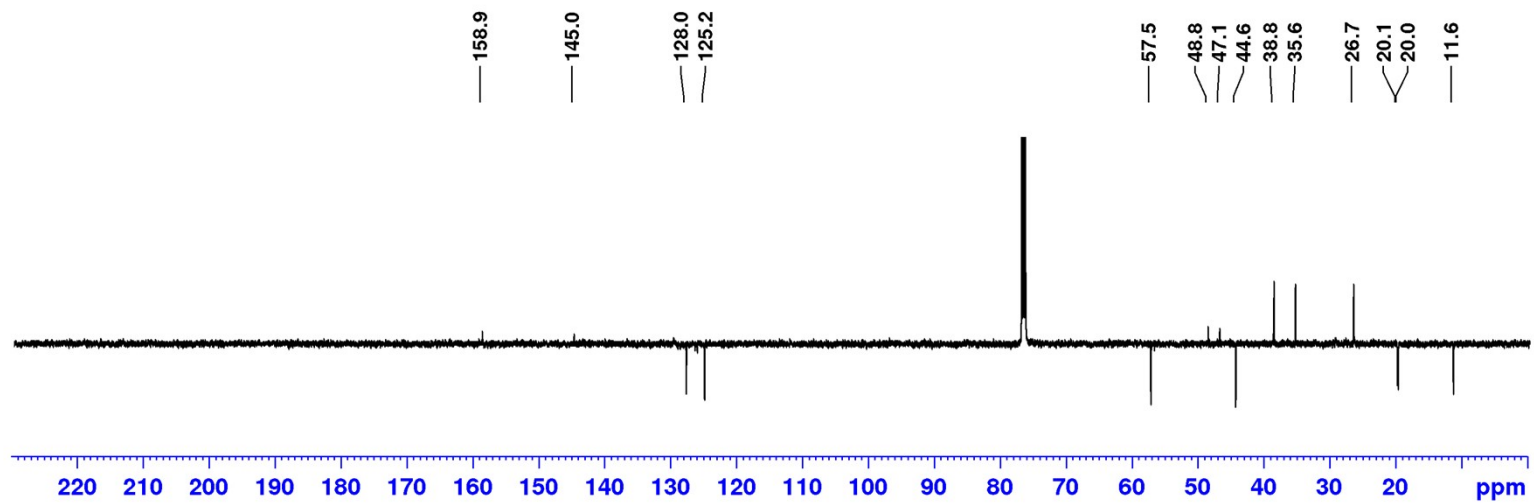

<sup>1</sup>H, 300MHz, CDCl<sub>3</sub>

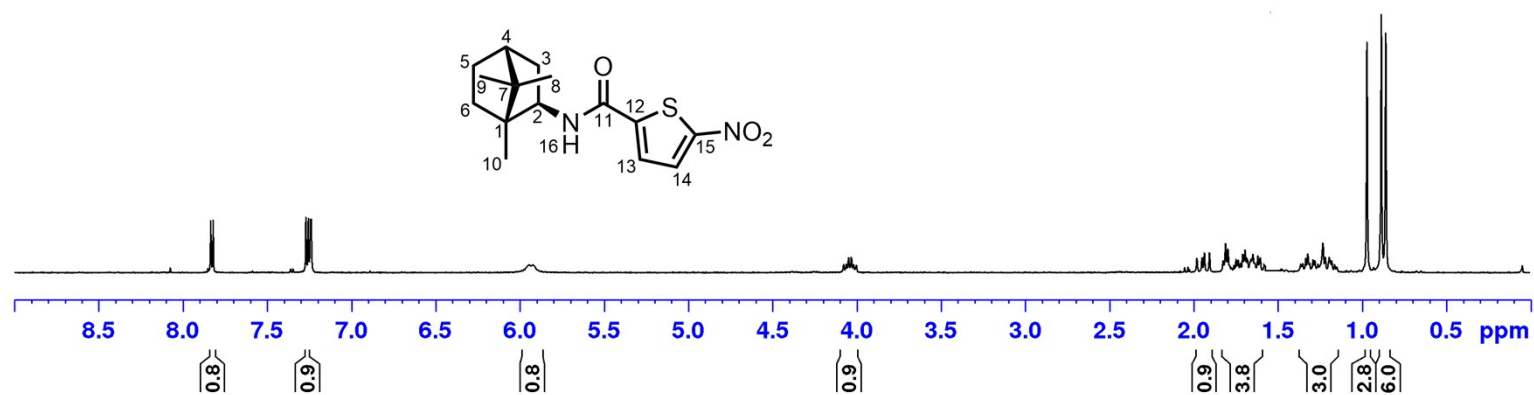

# Compound 20e

$^{13}\text{C}$ , JMOD,  $\text{CDCl}_3$

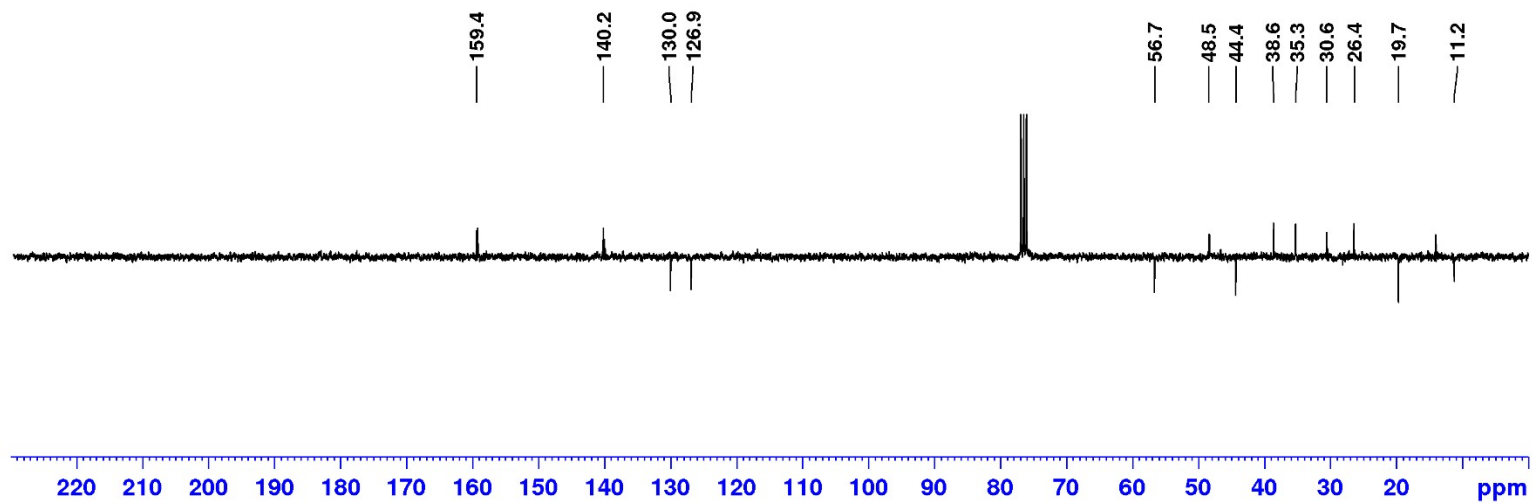

$^1\text{H}$ , 400MHz,  $\text{CDCl}_3$

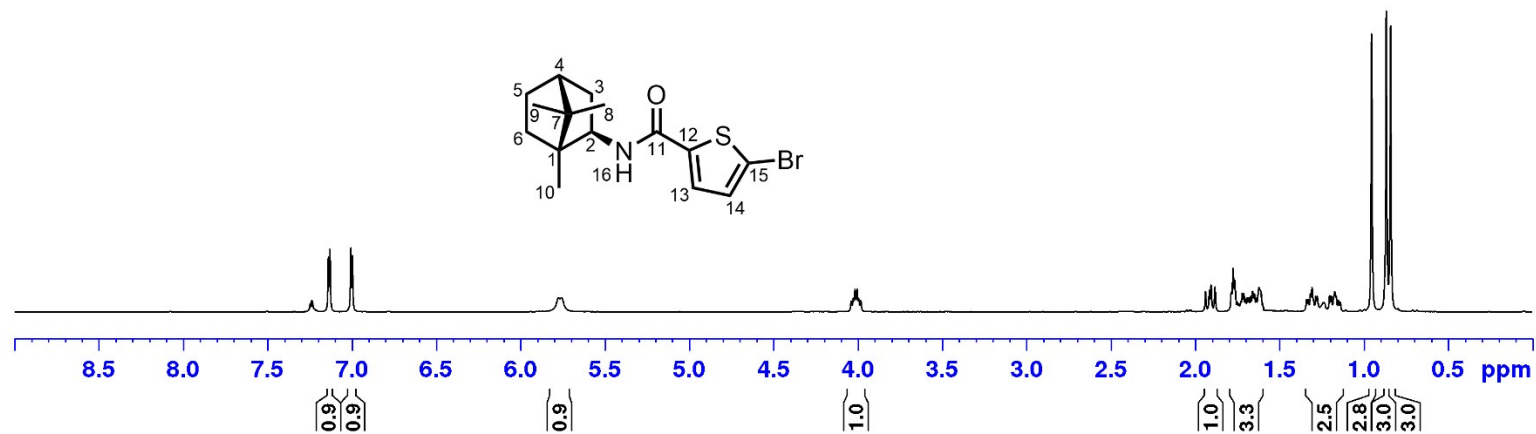

# Compound 20f

<sup>13</sup>C, JMOD, CDC13

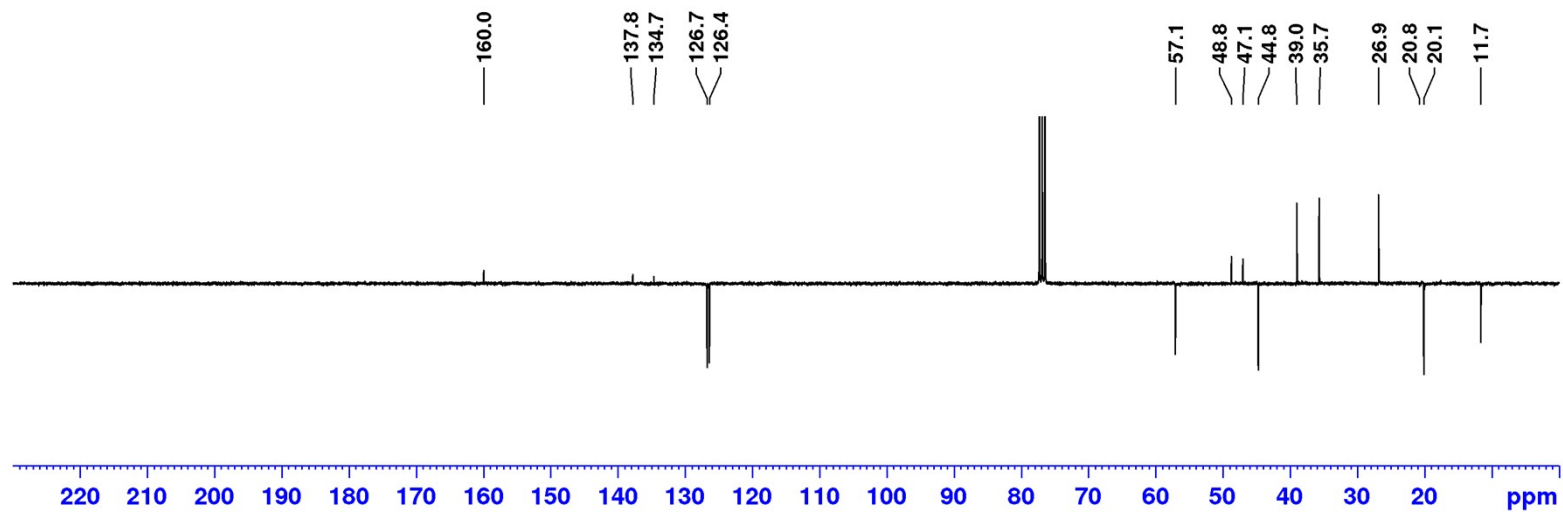

<sup>1</sup>H, 300MHz, CDC13

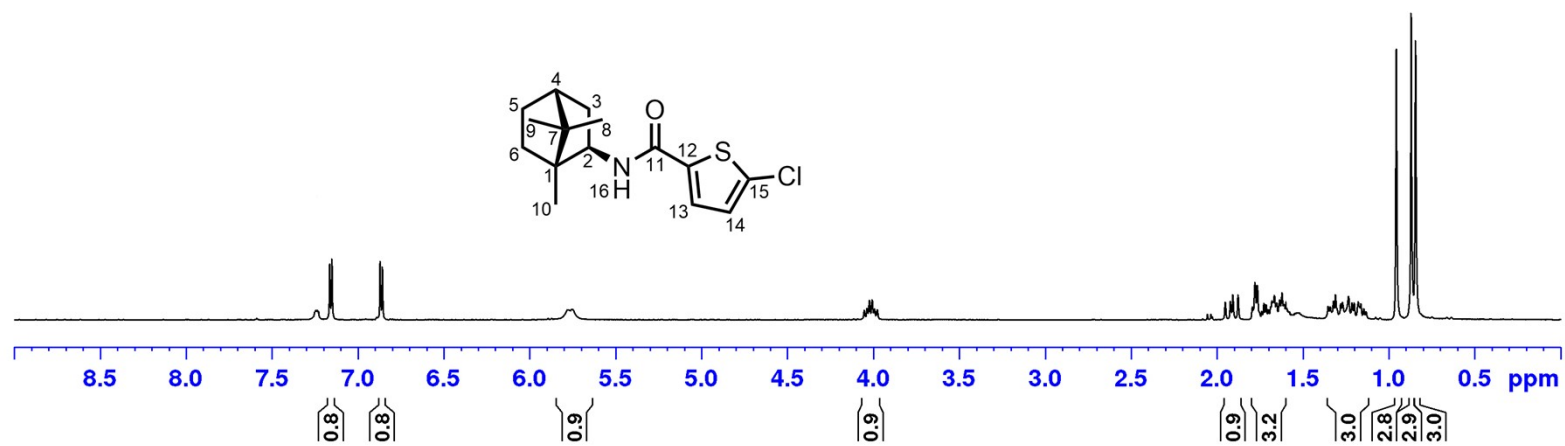

# Compound 20g

<sup>13</sup>C, JMOD, CDCl<sub>3</sub>

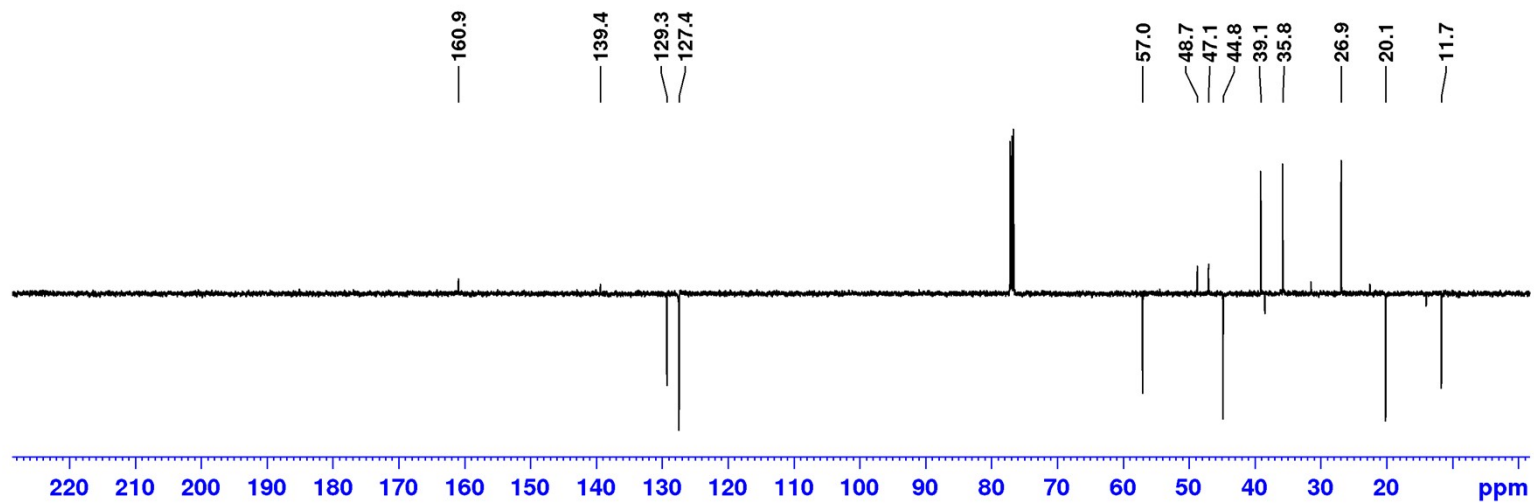

<sup>1</sup>H, 400MHz, CDCl<sub>3</sub>

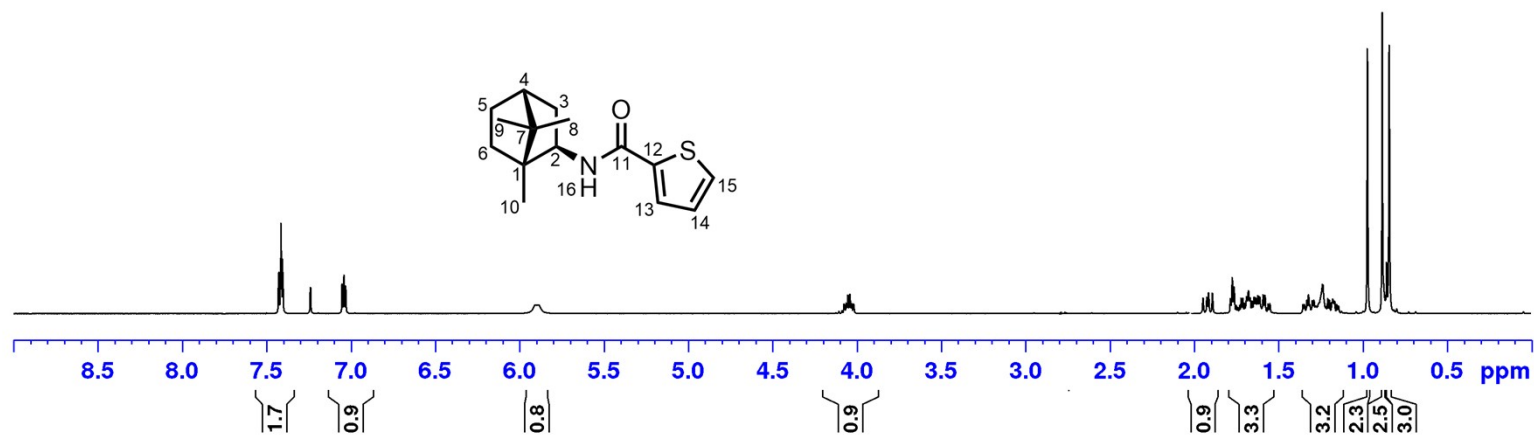

# Compound 20h

$^{13}\text{C}$ , JMOD,  $\text{CDCl}_3$

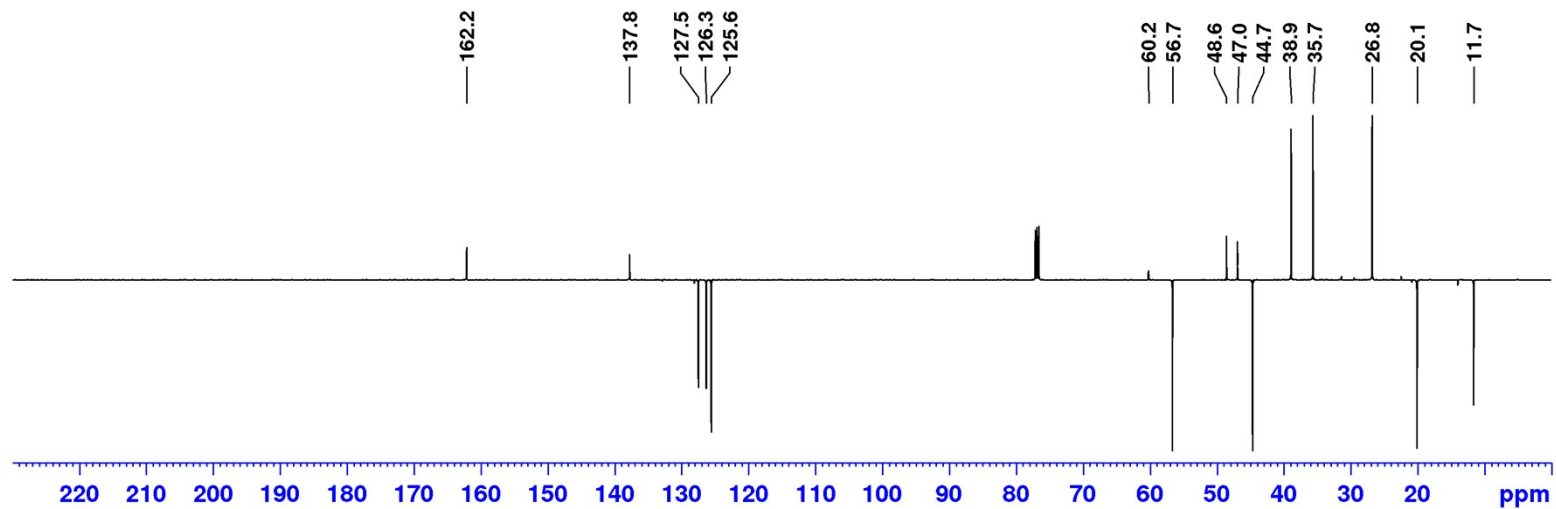

$^1\text{H}$ , 400MHz,  $\text{CDCl}_3$

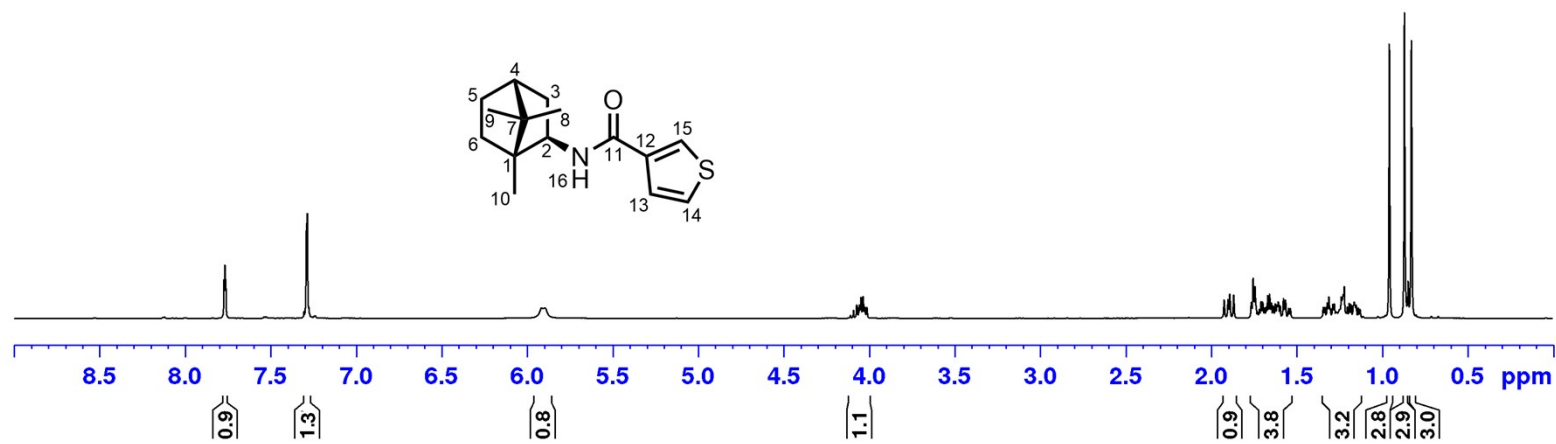

# Compound 21a

<sup>13</sup>C, JMOD, CDCl<sub>3</sub>

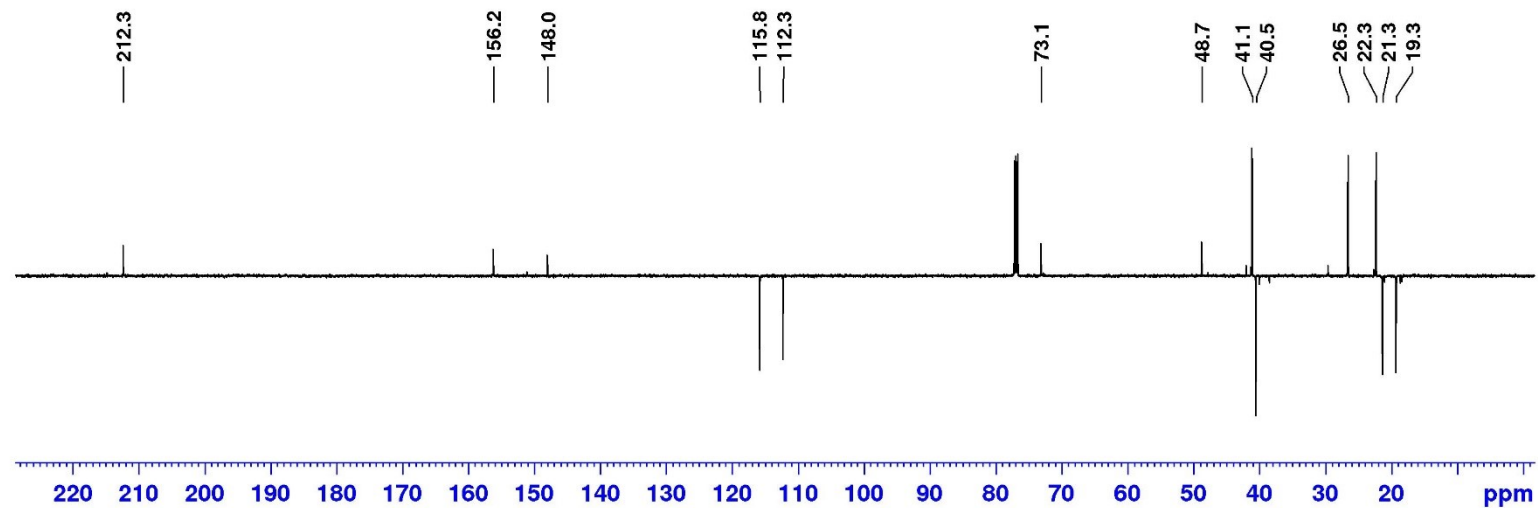

<sup>1</sup>H, 300 MHz, CDCl<sub>3</sub>

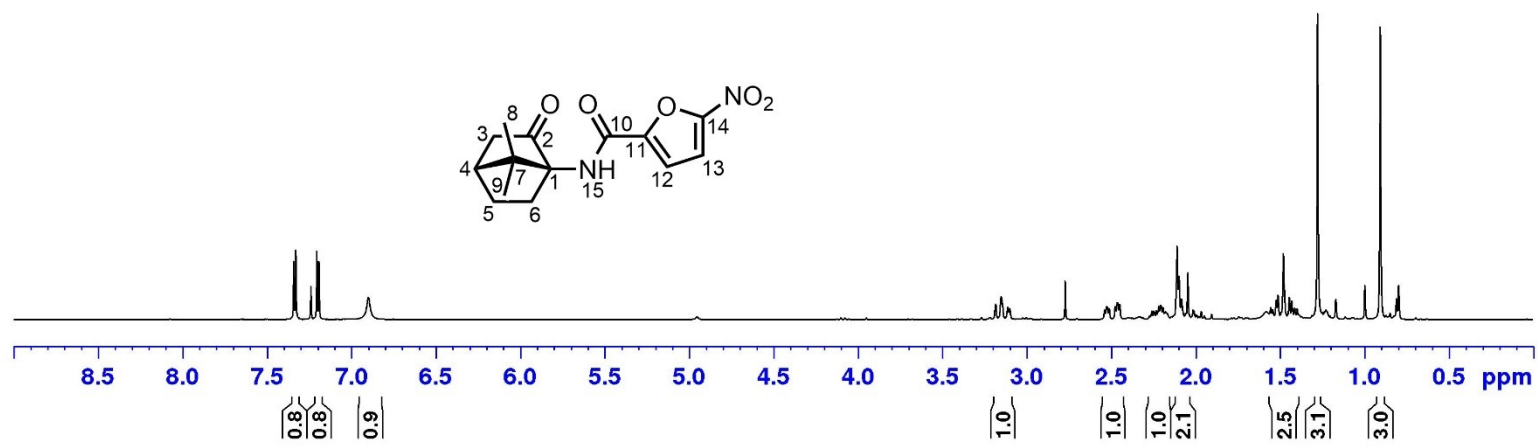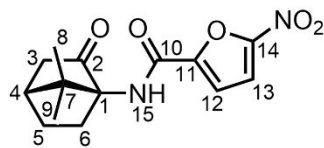

# Compound 21b

$^{13}\text{C}$ , JMOD,  $\text{CDCl}_3$

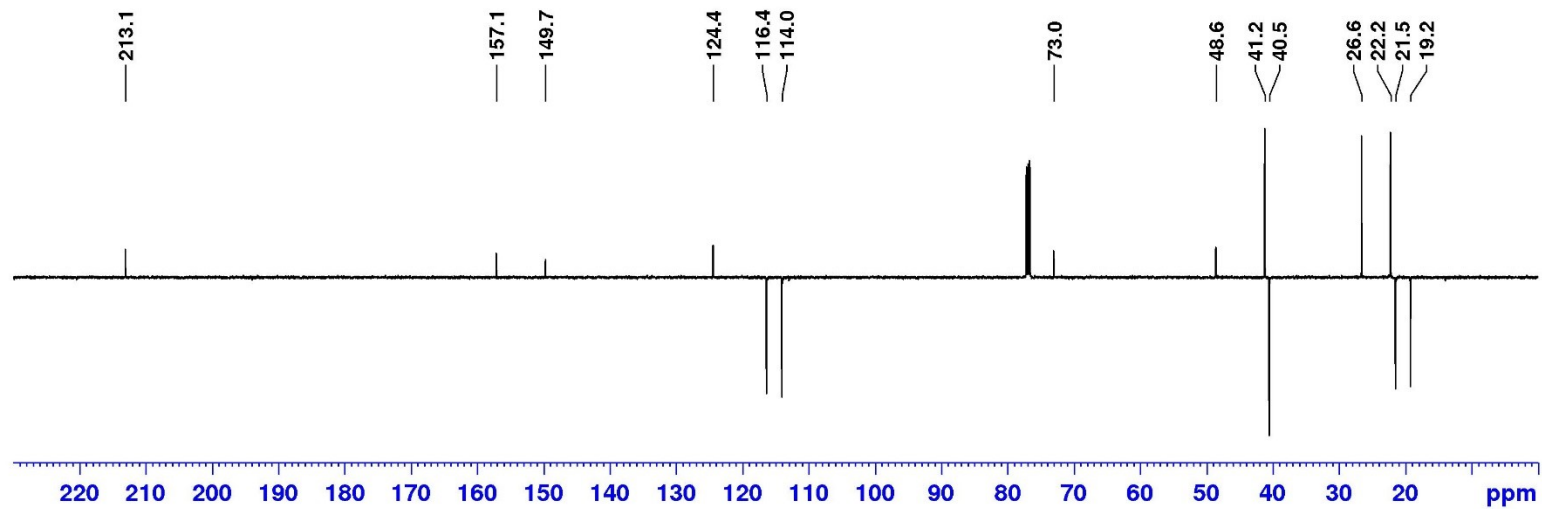

$^1\text{H}$ , 300 MHz,  $\text{CDCl}_3$

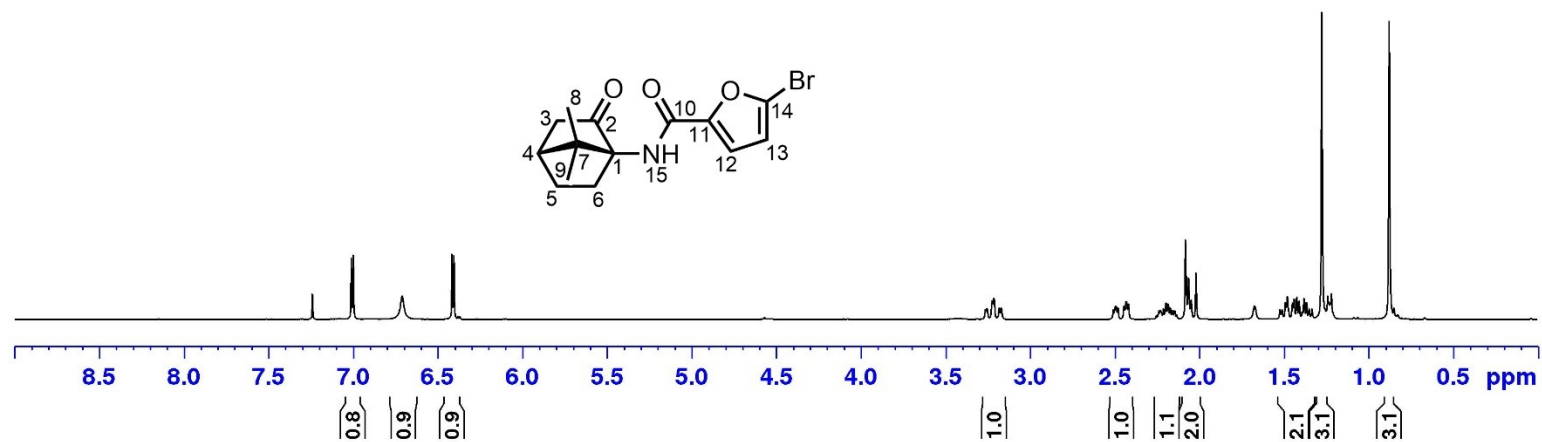

# Compound 21c

$^{13}\text{C}$ , JMOD,  $\text{CDCl}_3$

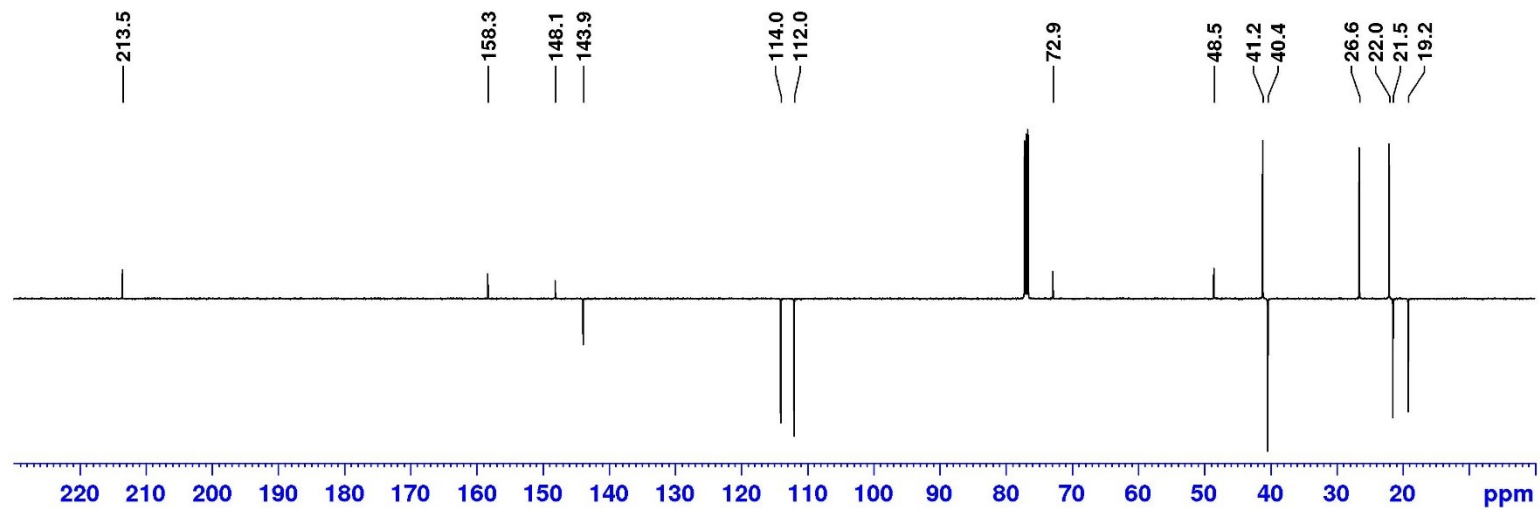

$^1\text{H}$ , 400 MHz,  $\text{CDCl}_3$

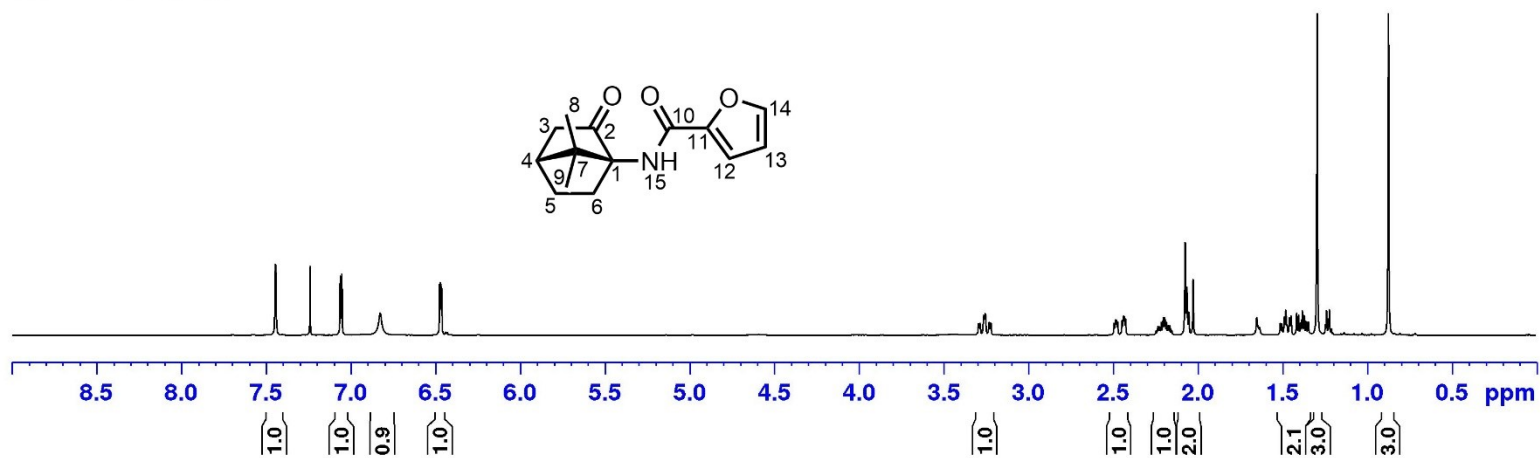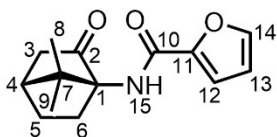

# Compound 21d

$^{13}\text{C}$ , JMOD,  $\text{CDCl}_3$

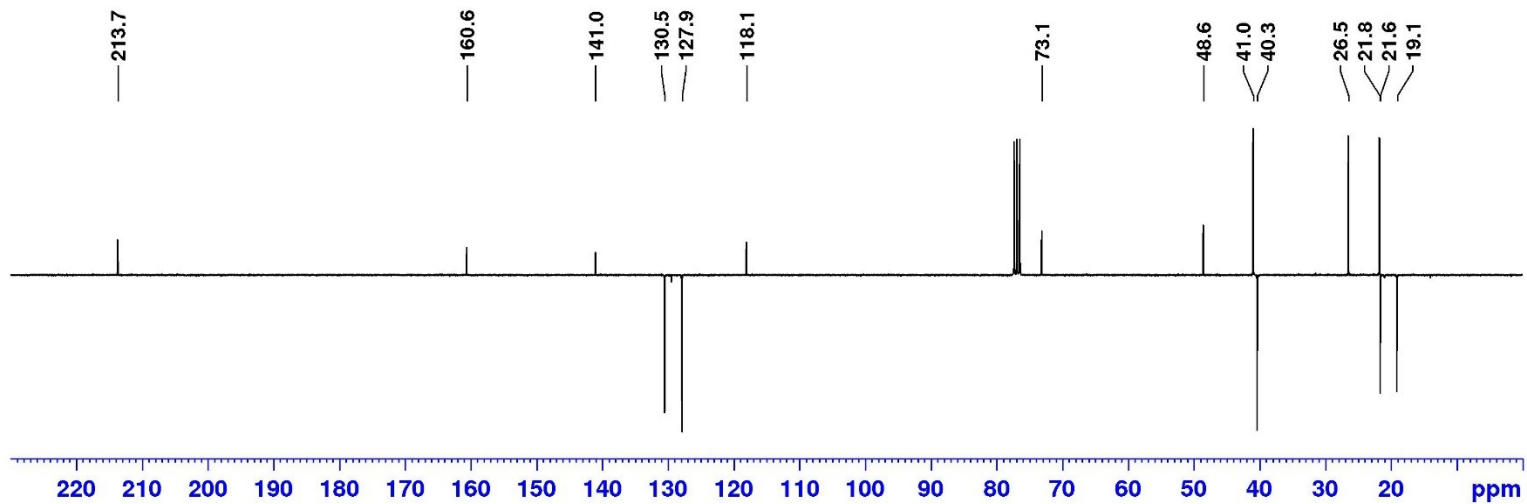

$^1\text{H}$ , 300 MHz,  $\text{CDCl}_3$

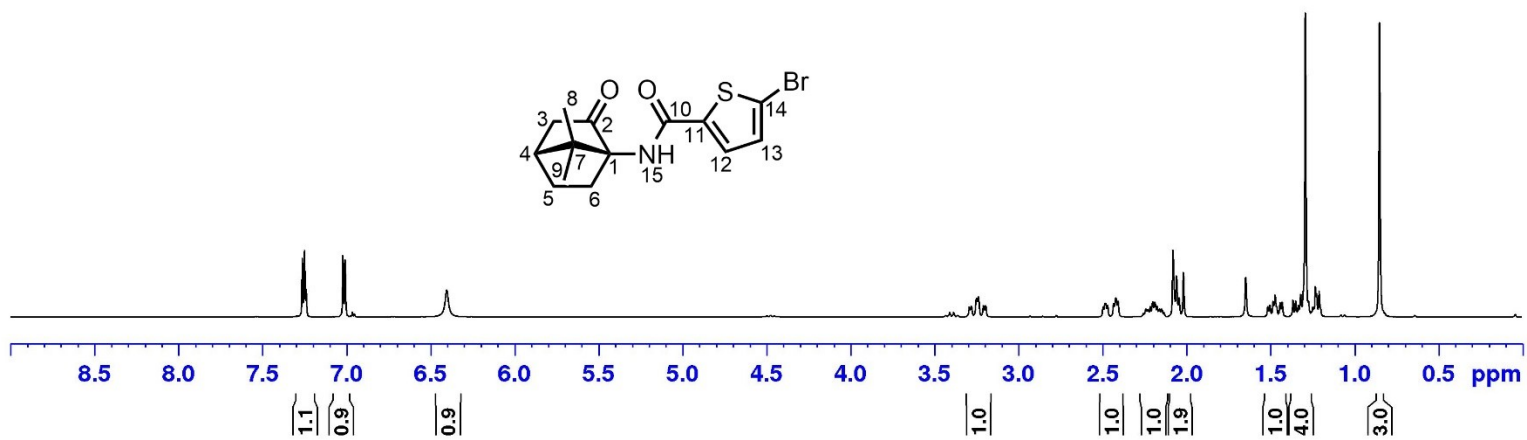

# Compound 21e

$^{13}\text{C}$ , JMOD,  $\text{CDCl}_3$

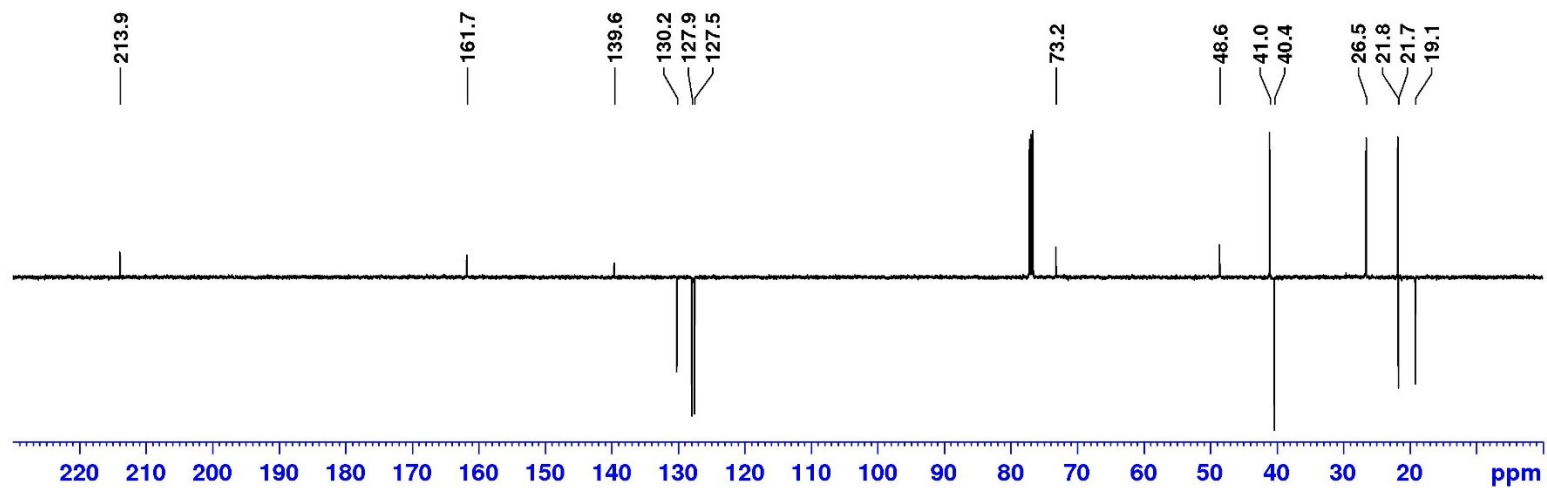

$^1\text{H}$ , 300 MHz,  $\text{CDCl}_3$

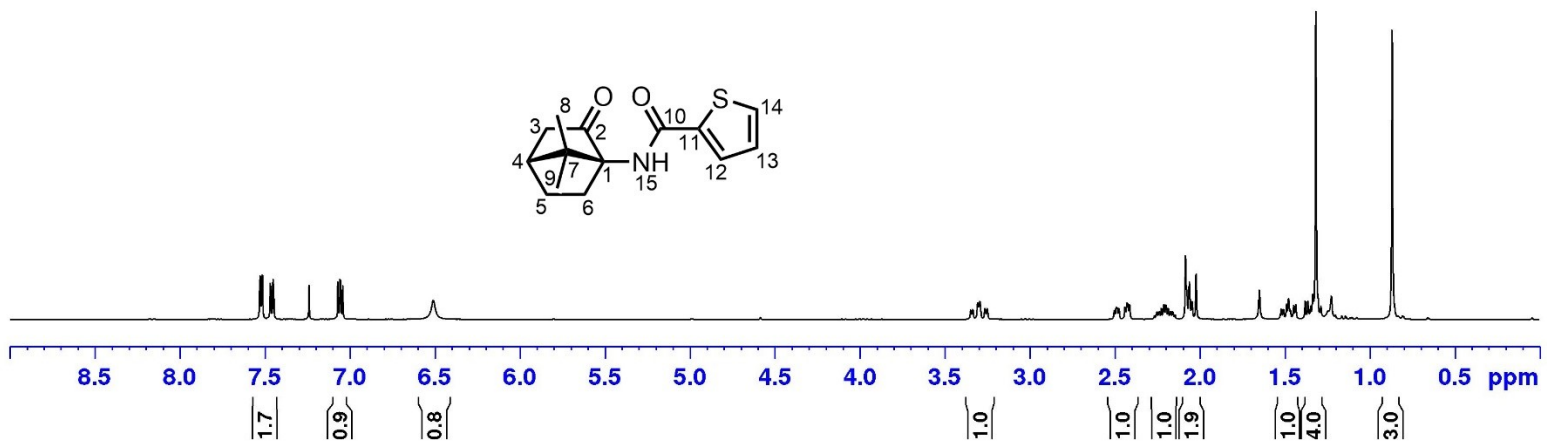

# Compound 22a

$^{13}\text{C}$ , JMOD,  $\text{CDCl}_3$

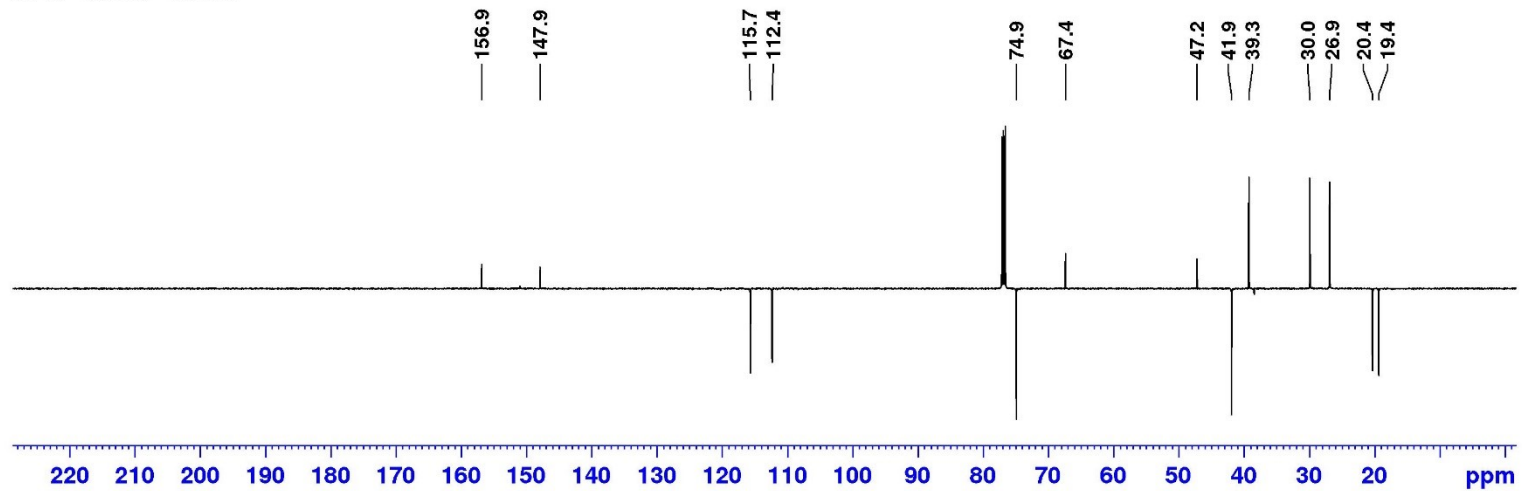

$^1\text{H}$ , 400 MHz,  $\text{CDCl}_3$

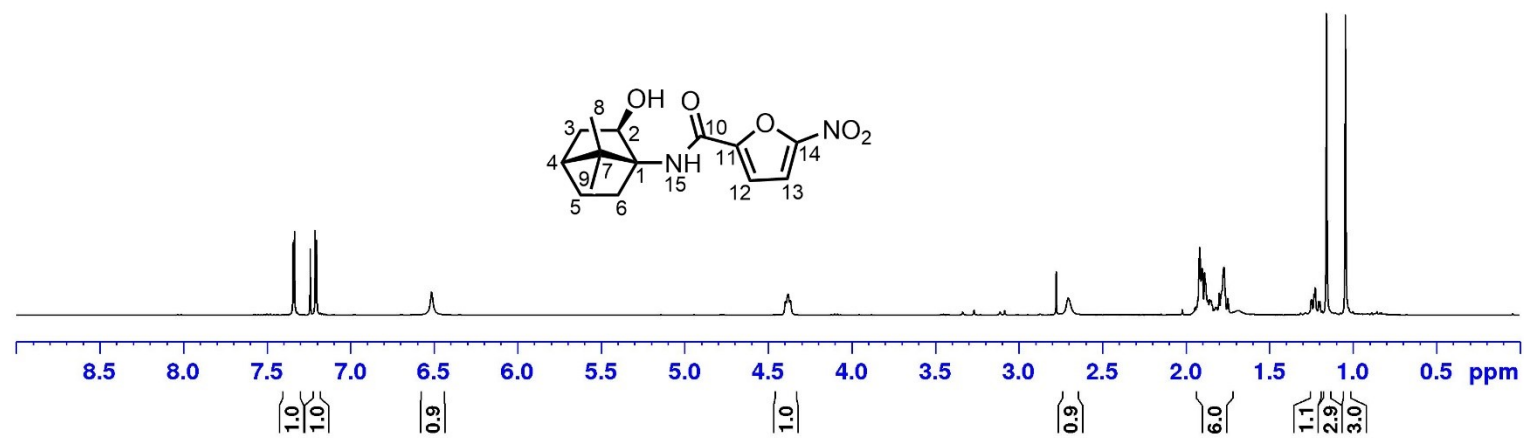

# Compound 22b

<sup>13</sup>C, JMOD, CDCl<sub>3</sub>

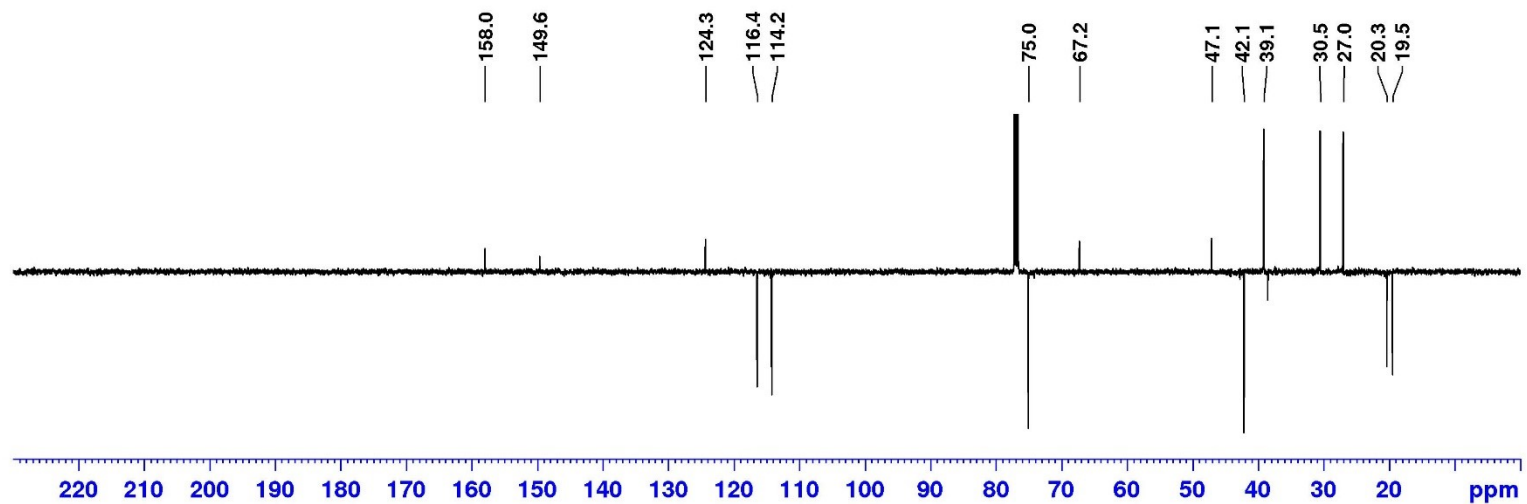

<sup>1</sup>H, 400 MHz, CDCl<sub>3</sub>

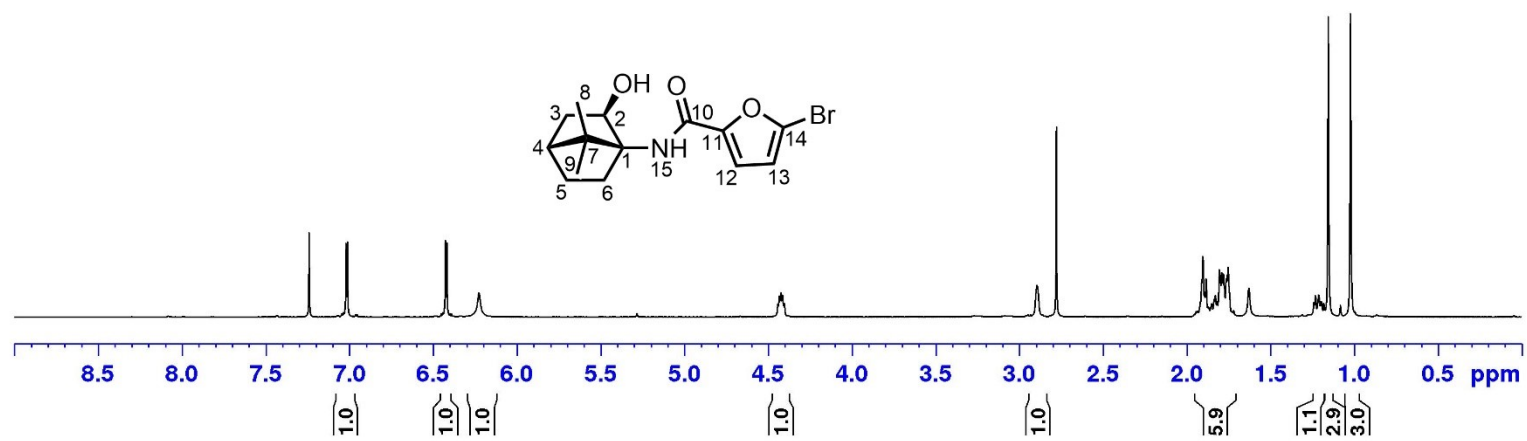

# Compound 22c

<sup>13</sup>C, JMOD, CDCl<sub>3</sub>

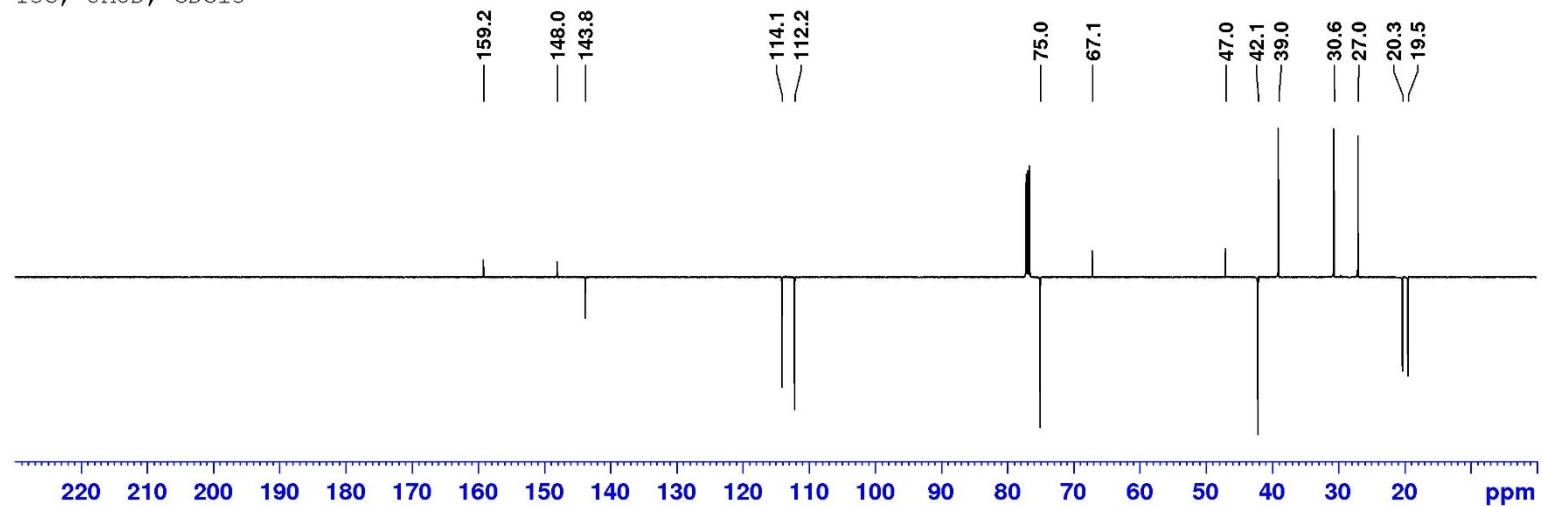

<sup>1</sup>H, 400 MHz, CDCl<sub>3</sub>

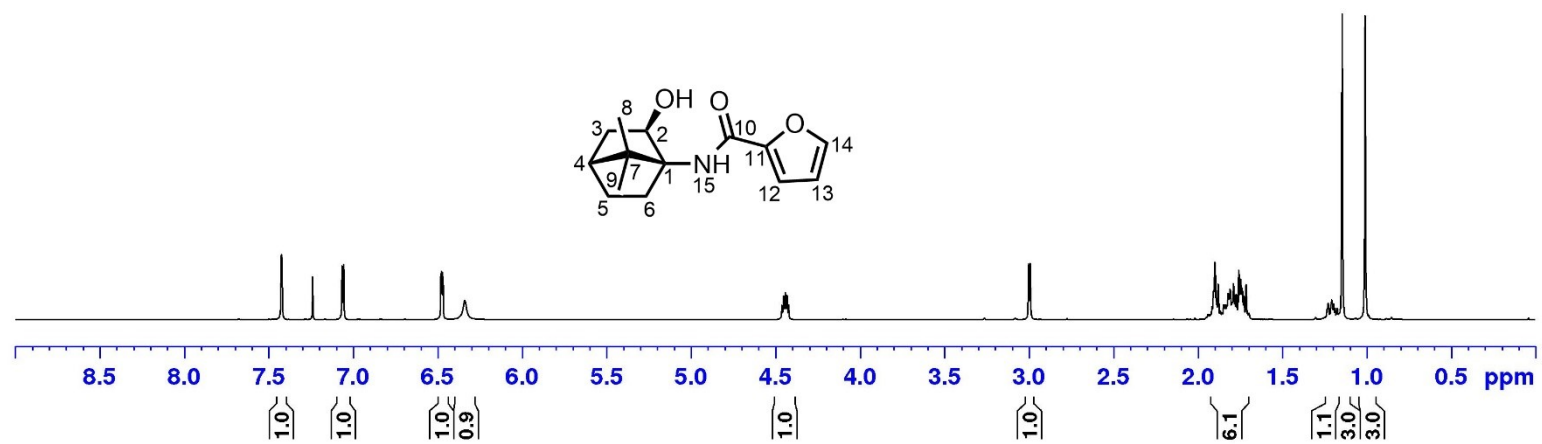

# Compound 22d

<sup>13</sup>C, JMOD, CDCl<sub>3</sub>

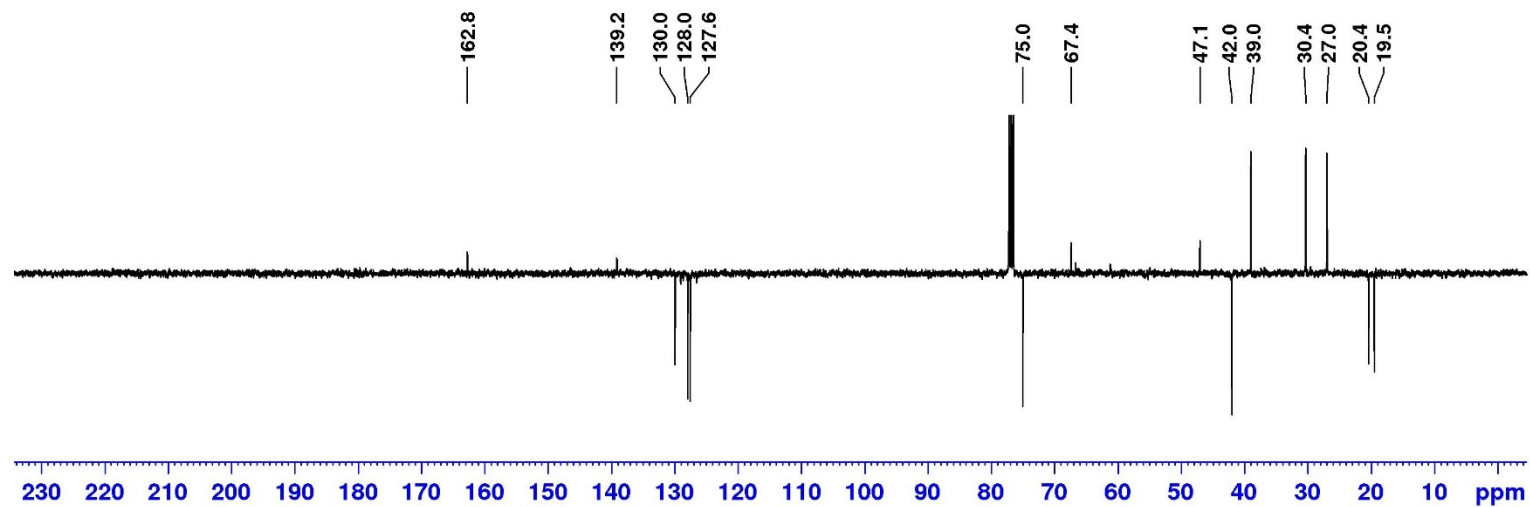

<sup>1</sup>H, 400 MHz, CDCl<sub>3</sub>

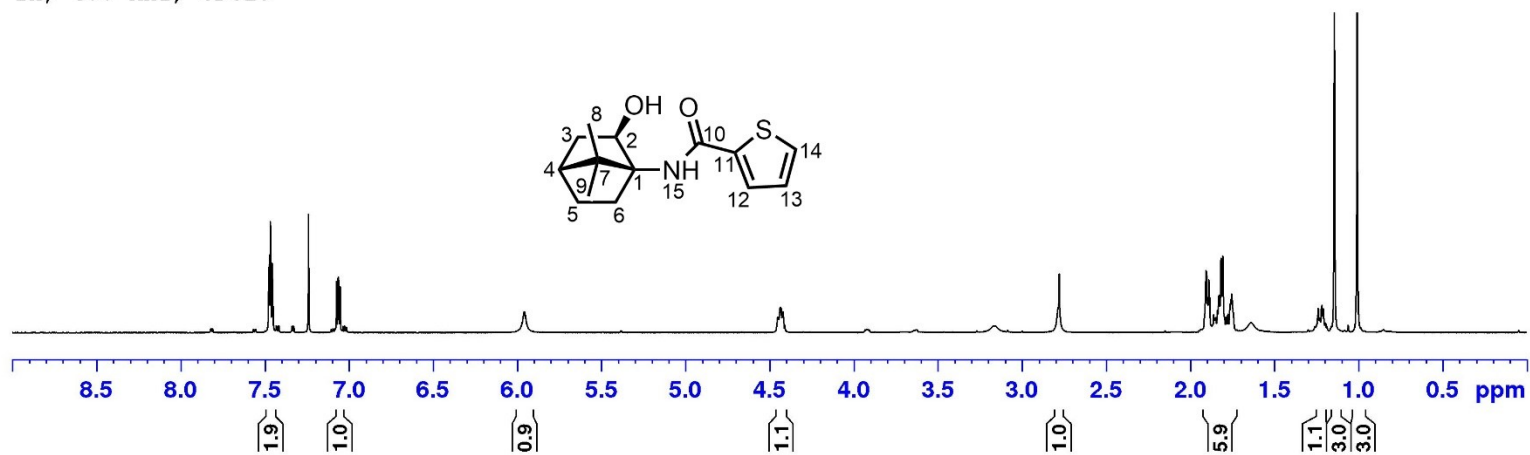

Supplement: d6md00217j2.pdf [file d6md00217j2.pdf]
