# Supplementary material
Source: Royal Society of Chemistry journal article supplement (doi:10.1039/d6md00217j)
Supplement: d6md00217j1.pdf [file d6md00217j1.pdf]

**HPLC** analysis was carried out using an HPLC-UV system (Agilent 1100, Agilent Technologies Inc., Santa Clara, CA, USA) with a Zorbax SB C18 column (150×2.1 mm with 3.5  $\mu\text{m}$  particle size; Agilent Technologies Inc., USA). The column was thermostatically controlled at 30°C. Gradient elution was various and performed under every obtained chromatogram where solvent (A) was 0.1% trifluoroacetic acid and solvent (B) – 100% methanol (for HPLC, gradient grade, Aquametry, Russia). The flow rate was 0.25 mL/min. The elution volume varied from one to five  $\mu\text{L}$  depending on the concentration of prepared solution. Peaks were detected using a maximum wavelength of 255 nm. Peaks from solvents were not included in the purity calculations.

**Sample preparation.** The samples were dissolved in MeOH and an aliquot of this solution was injected.

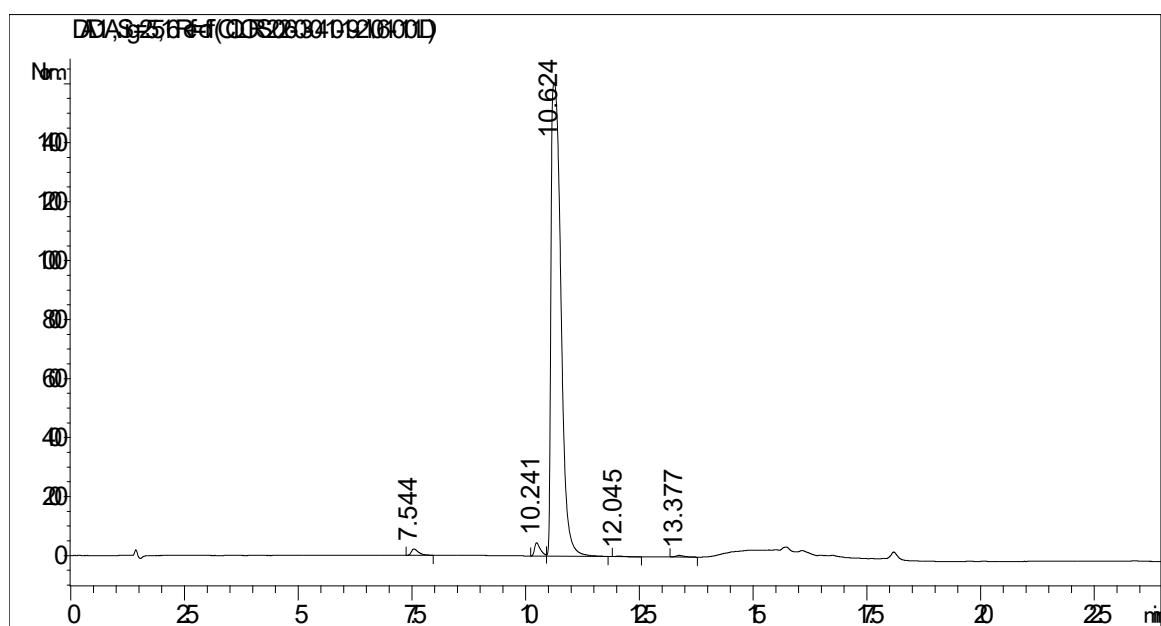

Figure 1. Compound **11a**. **Gradient elution** was used for separation the peak of main compound and other peaks: from 50%(B) to 70%(B) for 5 min, 70%(B) for 5 min, from 70%(B) to 100%(B) for 1 min, 100%(B) for 7 min, from 100%(B) to 50%(B) for 1 min, 50%(B) for 3 min. **Purity** was equal 96.9%.

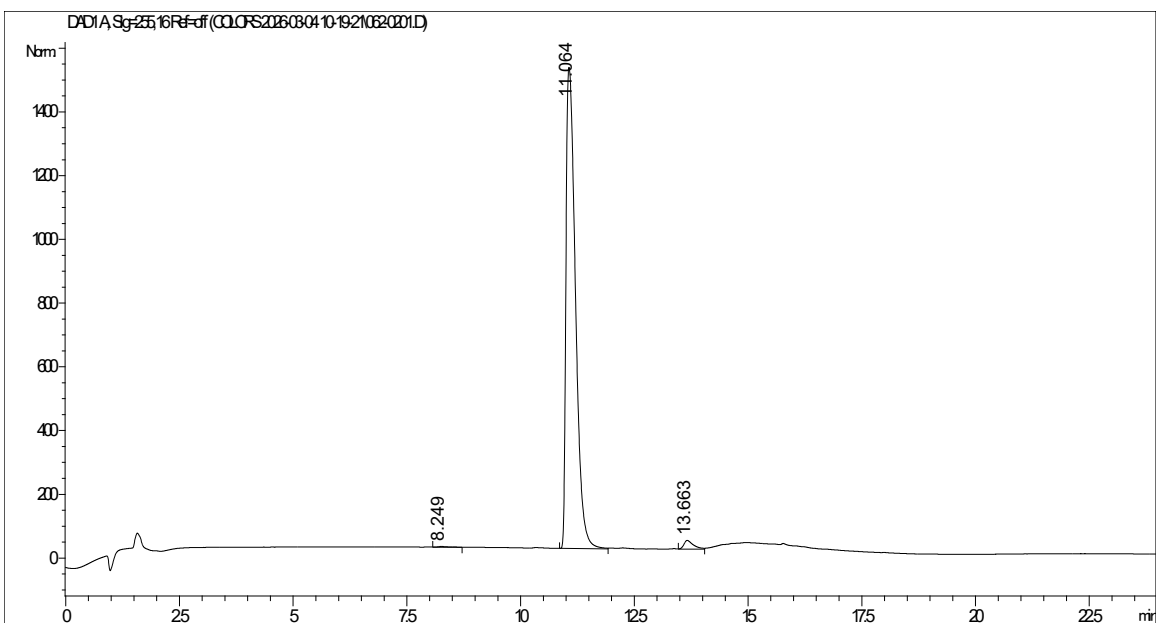

Figure 2. Compound **11d**. **Gradient elution** was used for separation the peak of main compound and other peaks: from 50%(B) to 70%(B) for 5 min, 70%(B) for 5 min, from 70%(B) to 100%(B) for 1 min, 100%(B) for 7 min, from 100%(B) to 50%(B) for 1 min, 50%(B) for 3 min. **Purity** was equal 98.0%.

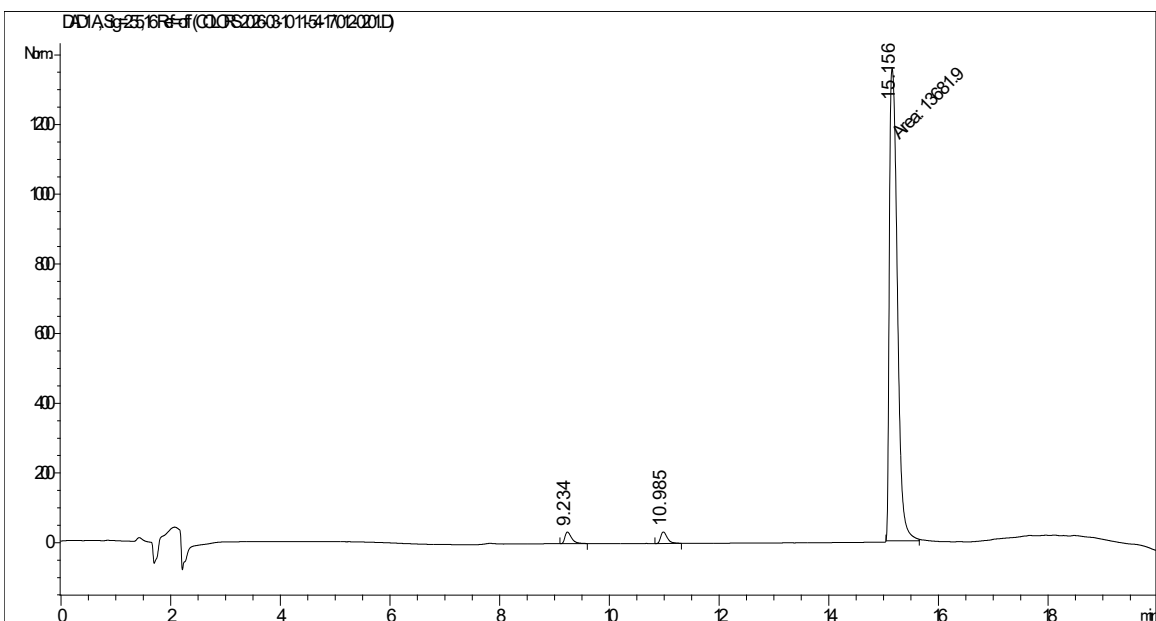

Figure 3. Compound **11e**. **Gradient elution** was used for separation the peak of main compound and other peaks: from 50%(B) to 70%(B) for 5 min, 70%(B) for 5 min, from 70%(B) to 100%(B) for 1 min, 100%(B) for 7 min, from 100%(B) to 50%(B) for 1 min, 50%(B) for 3 min. **Purity** was equal 96.1%.

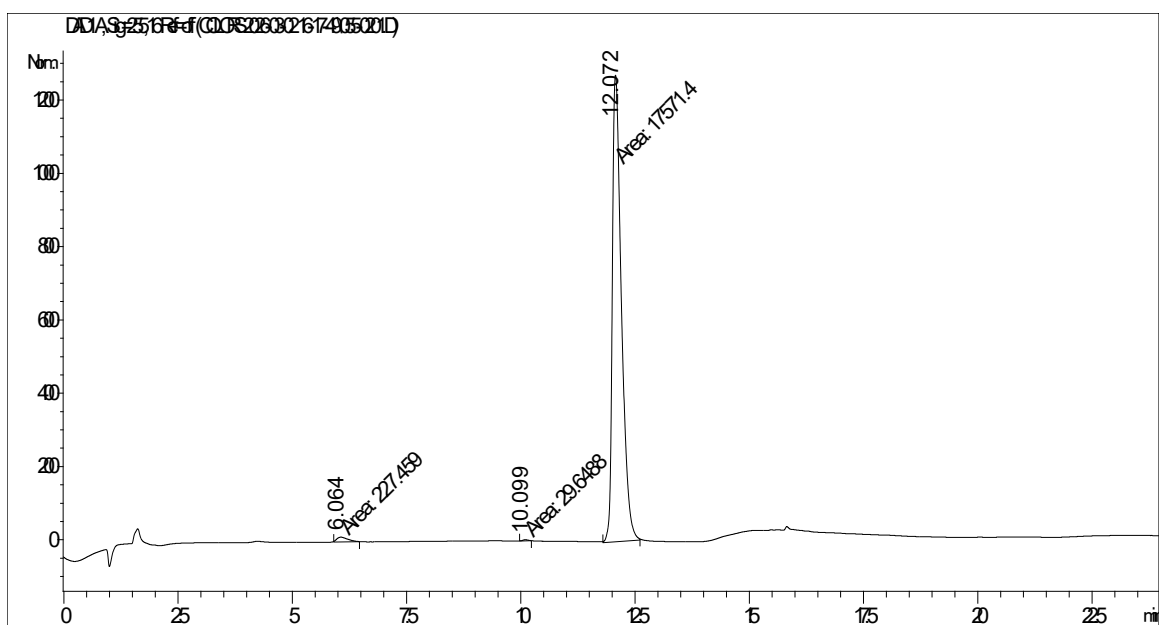

Figure 4. Compound **12a**. **Gradient elution** was used for separation the peak of main compound and other peaks: from 50%(B) to 70%(B) for 5 min, 70%(B) for 5 min, from 70%(B) to 100%(B) for 1 min, 100%(B) for 7 min, from 100%(B) to 50%(B) for 1 min, 50%(B) for 3 min. **Purity** was equal 98.6%.

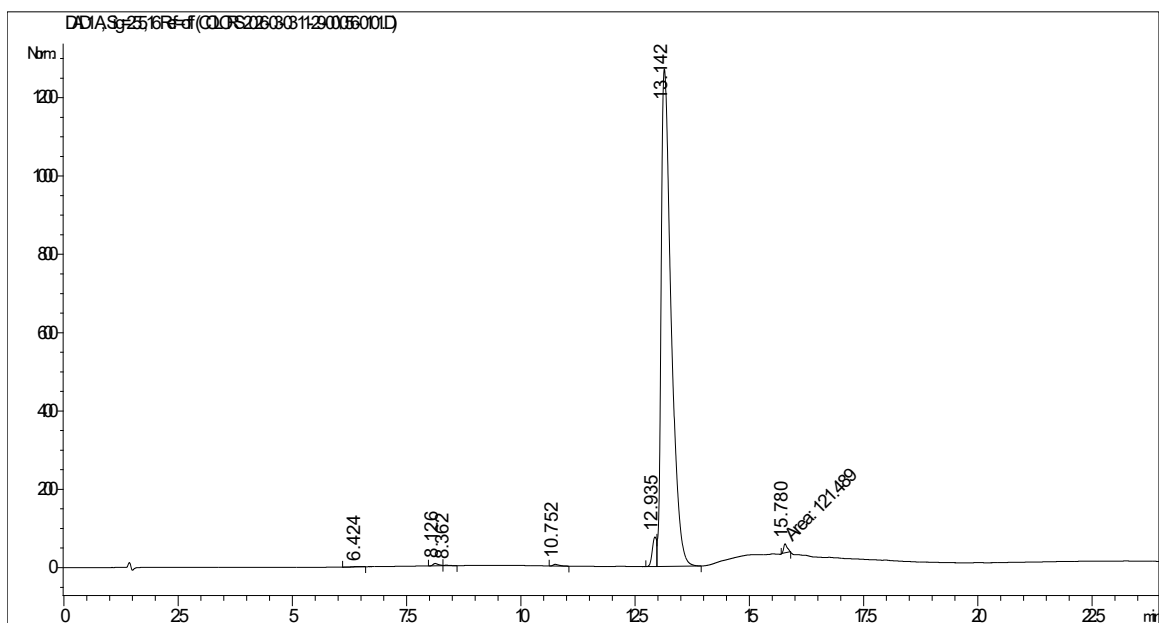

Figure 5. Compound **12d**. **Gradient elution** was used for separation the peak of main compound and other peaks: from 50%(B) to 70%(B) for 5 min, 70%(B) for 5 min, from 70%(B) to 100%(B) for 1 min, 100%(B) for 7 min, from 100%(B) to 50%(B) for 1 min, 50%(B) for 3 min. **Purity** was equal 96.3%.

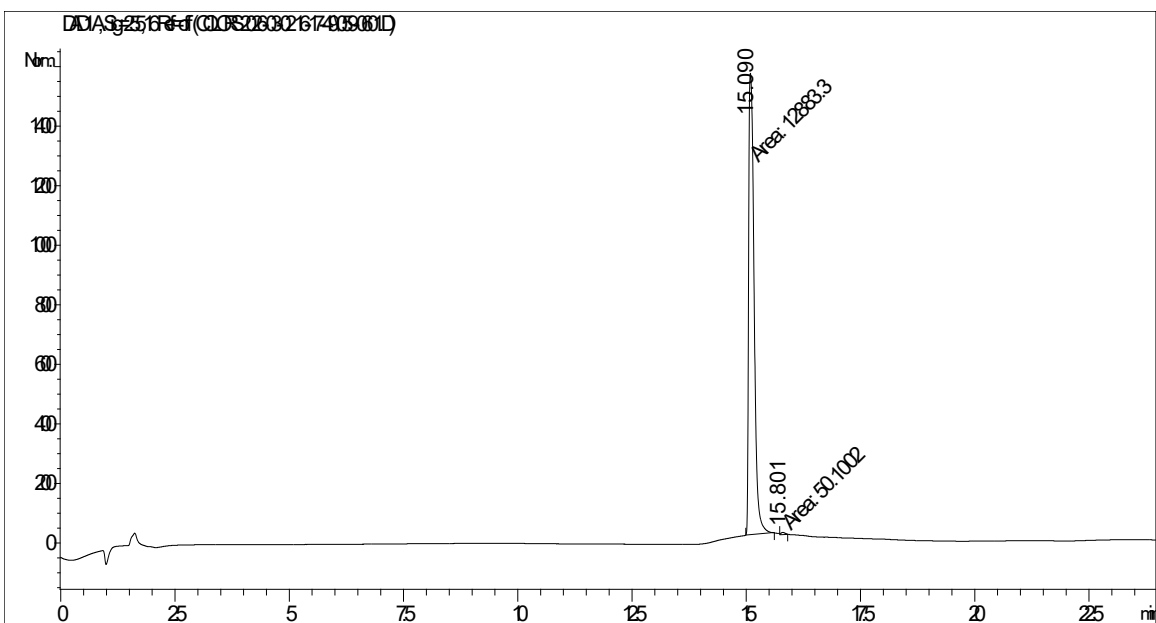

Figure 6. Compound **13a**. **Gradient elution** was used for separation the peak of main compound and other peaks: from 50%(B) to 70%(B) for 5 min, 70%(B) for 5 min, from 70%(B) to 100%(B) for 1 min, 100%(B) for 7 min, from 100%(B) to 50%(B) for 1 min, 50%(B) for 3 min. **Purity** was equal 99.6%.

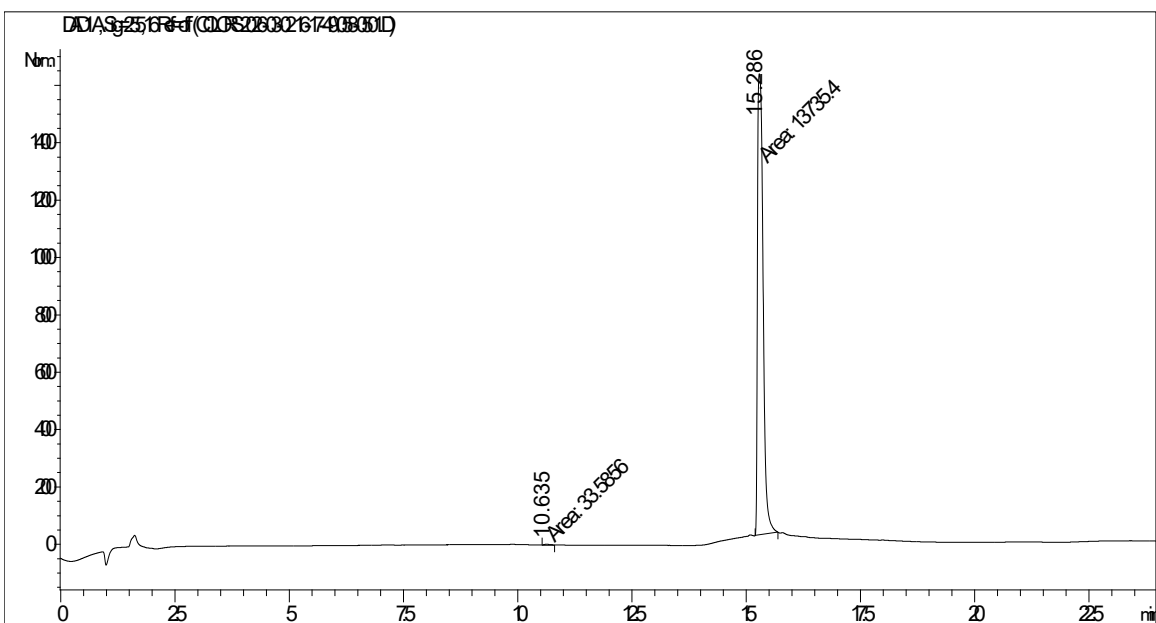

Figure 7. Compound **13b**. **Gradient elution** was used for separation the peak of main compound and other peaks: from 50%(B) to 70%(B) for 5 min, 70%(B) for 5 min, from 70%(B) to 100%(B) for 1 min, 100%(B) for 7 min, from 100%(B) to 50%(B) for 1 min, 50%(B) for 3 min. **Purity** was equal 99.8%.

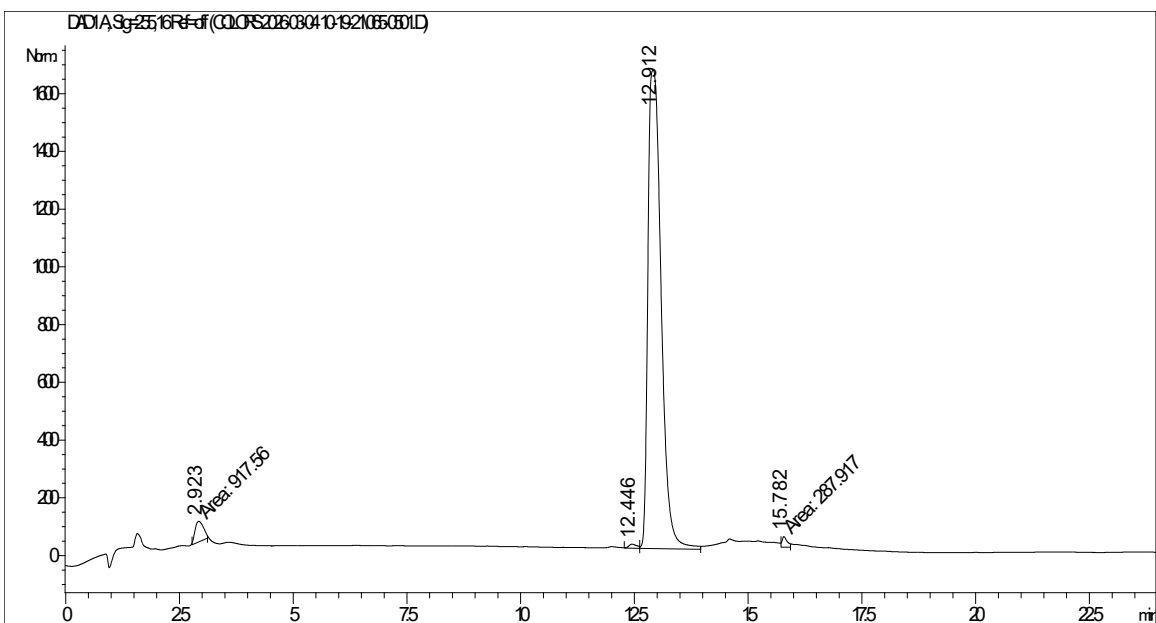

Figure 8. Compound **13c**. **Gradient elution** was used for separation the peak of main compound and other peaks: from 50%(B) to 70%(B) for 5 min, 70%(B) for 5 min, from 70%(B) to 100%(B) for 1 min, 100%(B) for 7 min, from 100%(B) to 50%(B) for 1 min, 50%(B) for 3 min. **Purity** was equal 96.0%.

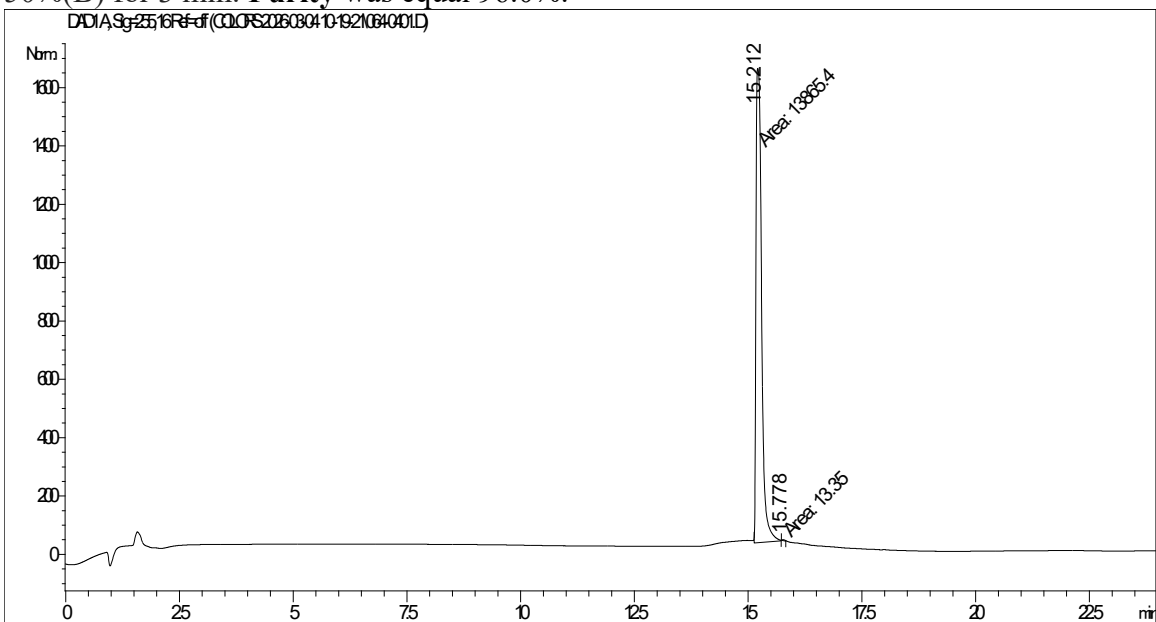

Figure 9. Compound **13d**. **Gradient elution** was used for separation the peak of main compound and other peaks: from 50%(B) to 70%(B) for 5 min, 70%(B) for 5 min, from 70%(B) to 100%(B) for 1 min, 100%(B) for 7 min, from 100%(B) to 50%(B) for 1 min, 50%(B) for 3 min. **Purity** was equal 99.9%.

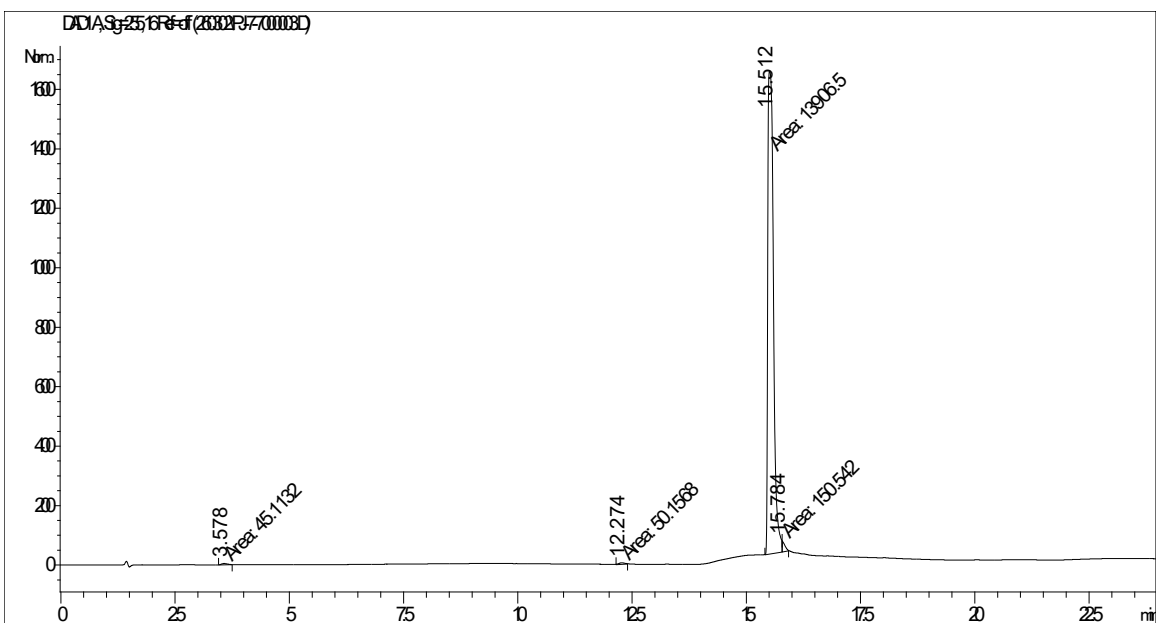

Figure 10. Compound **15a**. **Gradient elution** was used for separation the peak of main compound and other peaks: from 50%(B) to 70%(B) for 5 min, 70%(B) for 5 min, from 70%(B) to 100%(B) for 1 min, 100%(B) for 7 min, from 100%(B) to 50%(B) for 1 min, 50%(B) for 3 min. **Purity** was equal 98.3%.

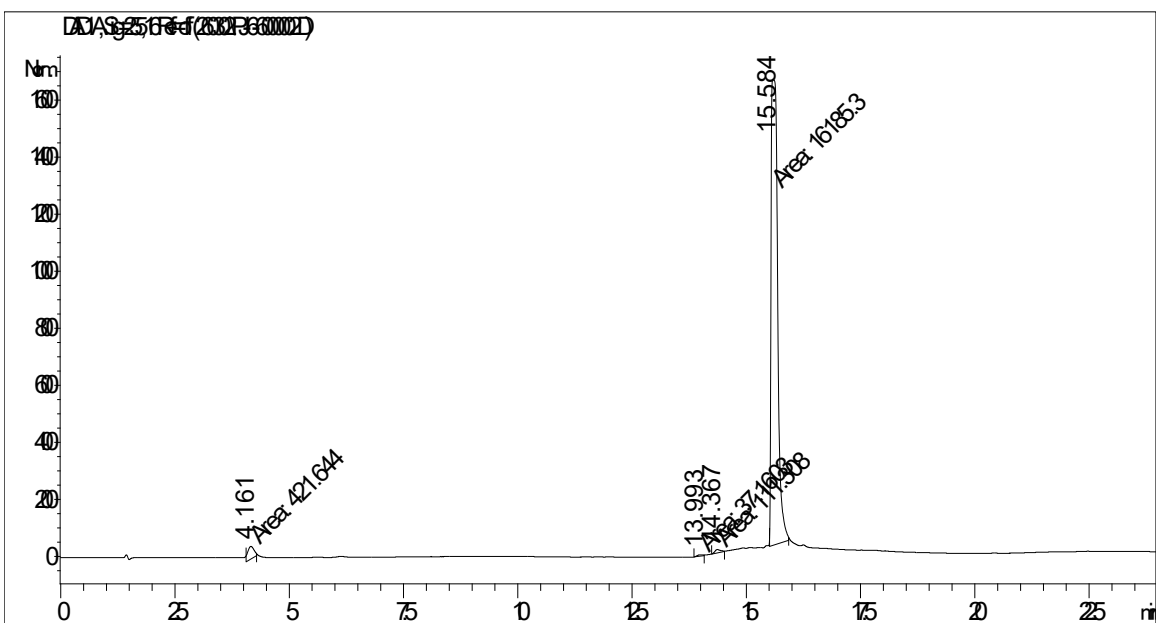

Figure 11. Compound **15b**. **Gradient elution** was used for separation the peak of main compound and other peaks: from 50%(B) to 70%(B) for 5 min, 70%(B) for 5 min, from 70%(B) to 100%(B) for 1 min, 100%(B) for 7 min, from 100%(B) to 50%(B) for 1 min, 50%(B) for 3 min. **Purity** was equal 96.6%.

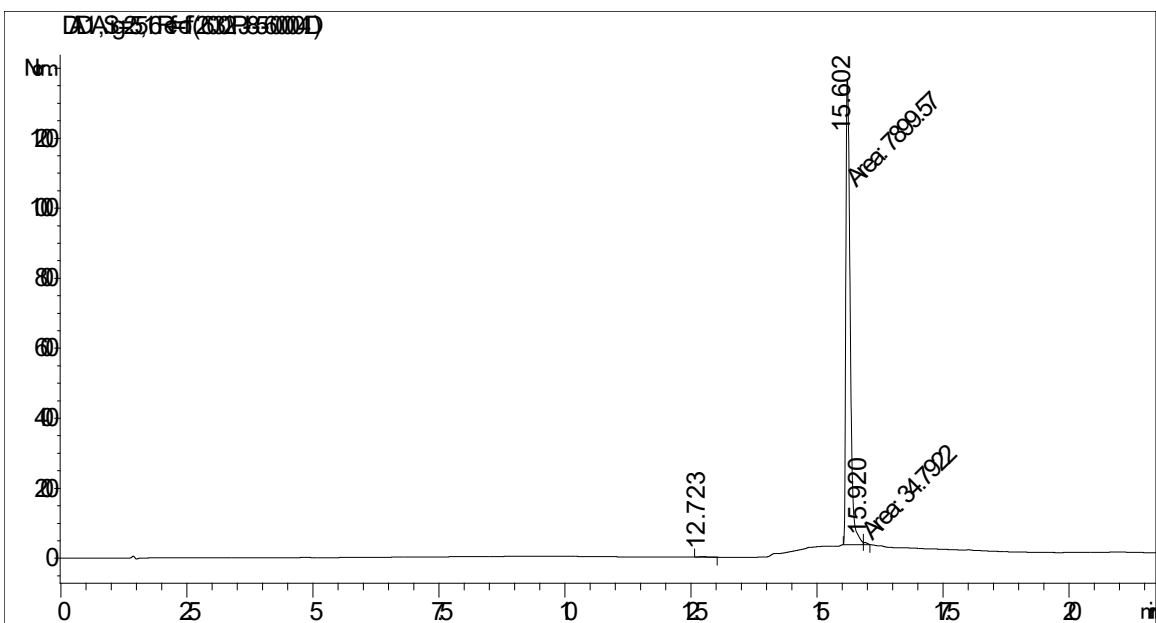

Figure 12. Compound **15d**. **Gradient elution** was used for separation the peak of main compound and other peaks: from 50%(B) to 70%(B) for 5 min, 70%(B) for 5 min, from 70%(B) to 100%(B) for 1 min, 100%(B) for 7 min, from 100%(B) to 50%(B) for 1 min, 50%(B) for 3 min. **Purity** was equal 99.3%.

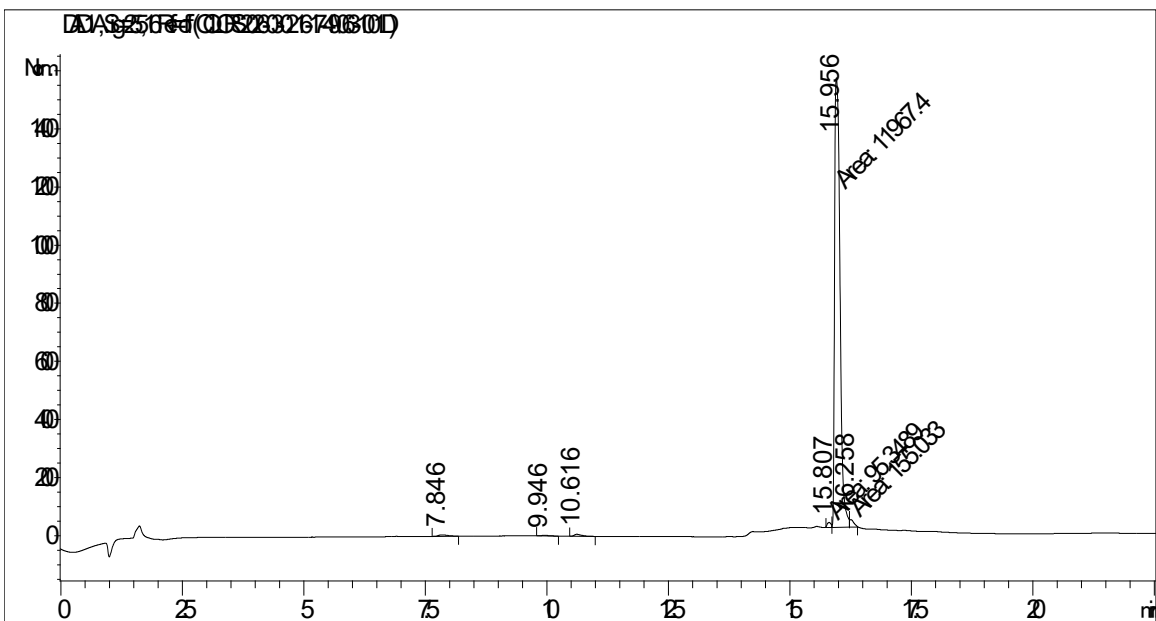

Figure 13. Compound **17b**. **Gradient elution** was used for separation the peak of main compound and other peaks: from 50%(B) to 70%(B) for 5 min, 70%(B) for 5 min, from 70%(B) to 100%(B) for 1 min, 100%(B) for 7 min, from 100%(B) to 50%(B) for 1 min, 50%(B) for 3 min. **Purity** was equal 96.6%.

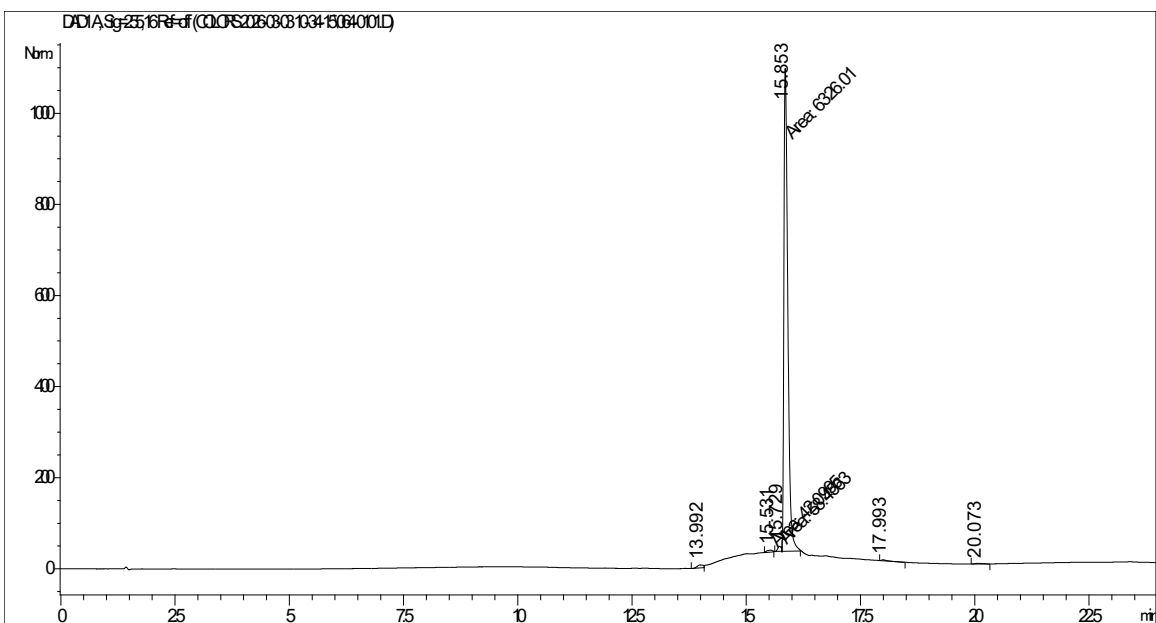

Figure 14. Compound **17d**. **Gradient elution** was used for separation the peak of main compound and other peaks: from 50%(B) to 70%(B) for 5 min, 70%(B) for 5 min, from 70%(B) to 100%(B) for 1 min, 100%(B) for 7 min, from 100%(B) to 50%(B) for 1 min, 50%(B) for 3 min. **Purity** was equal 97.0%.

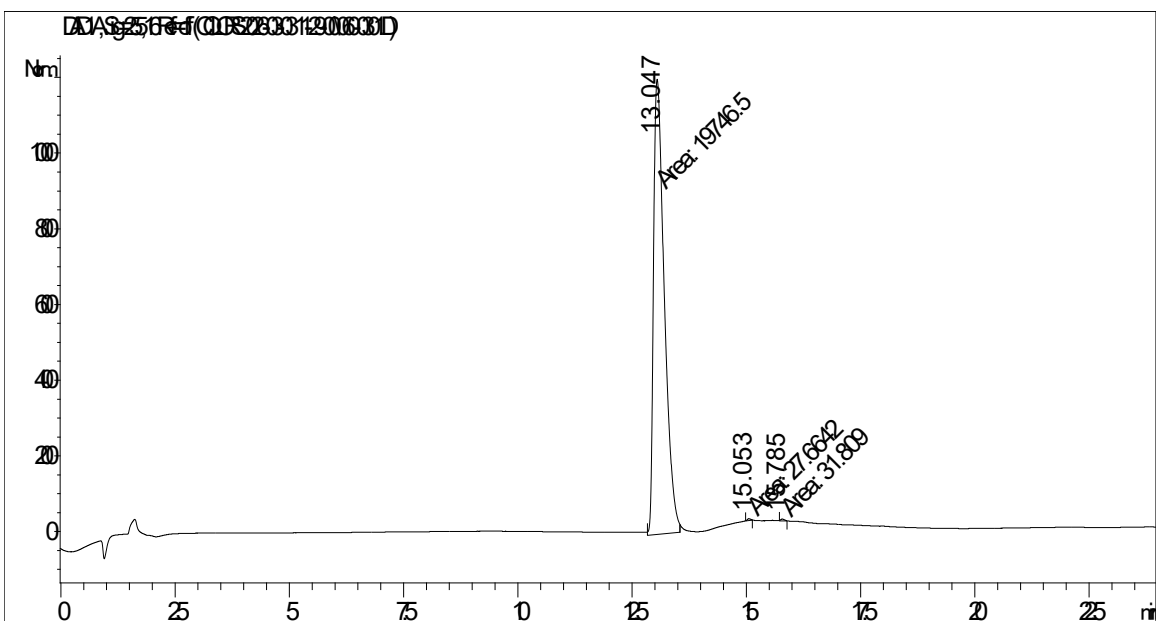

Figure 15. Compound **17e**. **Gradient elution** was used for separation the peak of main compound and other peaks: from 50%(B) to 70%(B) for 5 min, 70%(B) for 5 min, from 70%(B) to 100%(B) for 1 min, 100%(B) for 7 min, from 100%(B) to 50%(B) for 1 min, 50%(B) for 3 min. **Purity** was equal 99.7%.

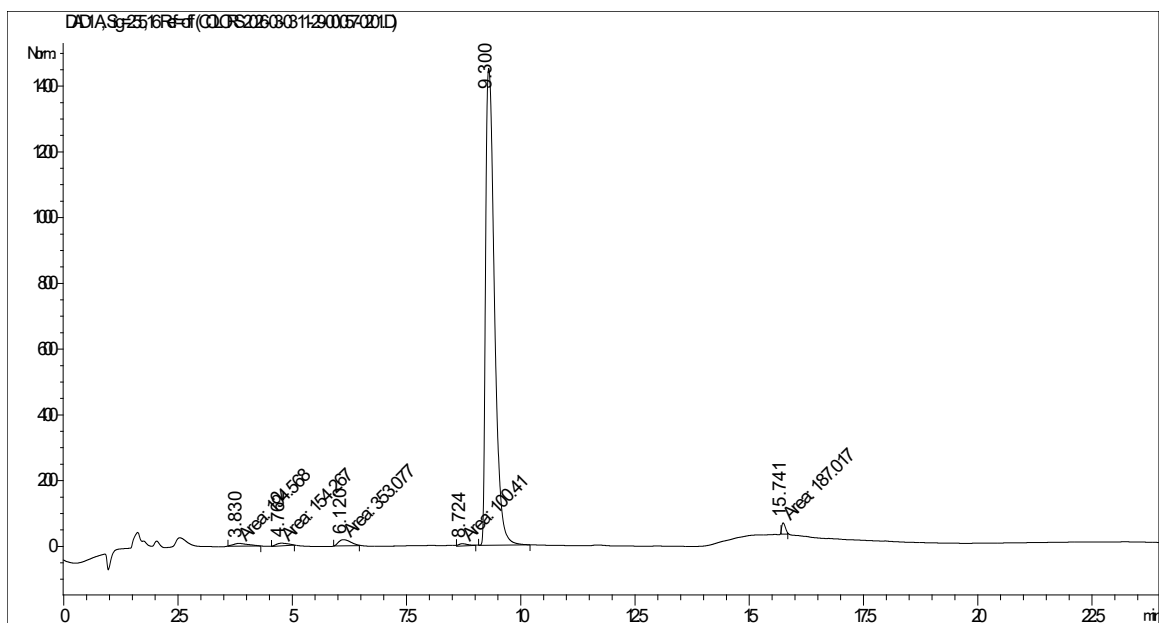

Figure 16. Compound **22a**. **Gradient elution** was used for separation the peak of main compound and other peaks: from 50%(B) to 70%(B) for 5 min, 70%(B) for 5 min, from 70%(B) to 100%(B) for 1 min, 100%(B) for 7 min, from 100%(B) to 50%(B) for 1 min, 50%(B) for 3 min. **Purity** was equal 95.2%.

**GC-MS analysis** was performed using an Agilent 5975C inert MSD with a 7890A GC system equipped with a flame ionization detector, an HP-5 capillary column (0.25 mm × 30 m 0.25 mm), and He as the carrier gas (flow rate 2 mL/min, flow division 99:1).

**Sample preparation.** The samples were dissolved in MeOH and an aliquot of this solution was injected.

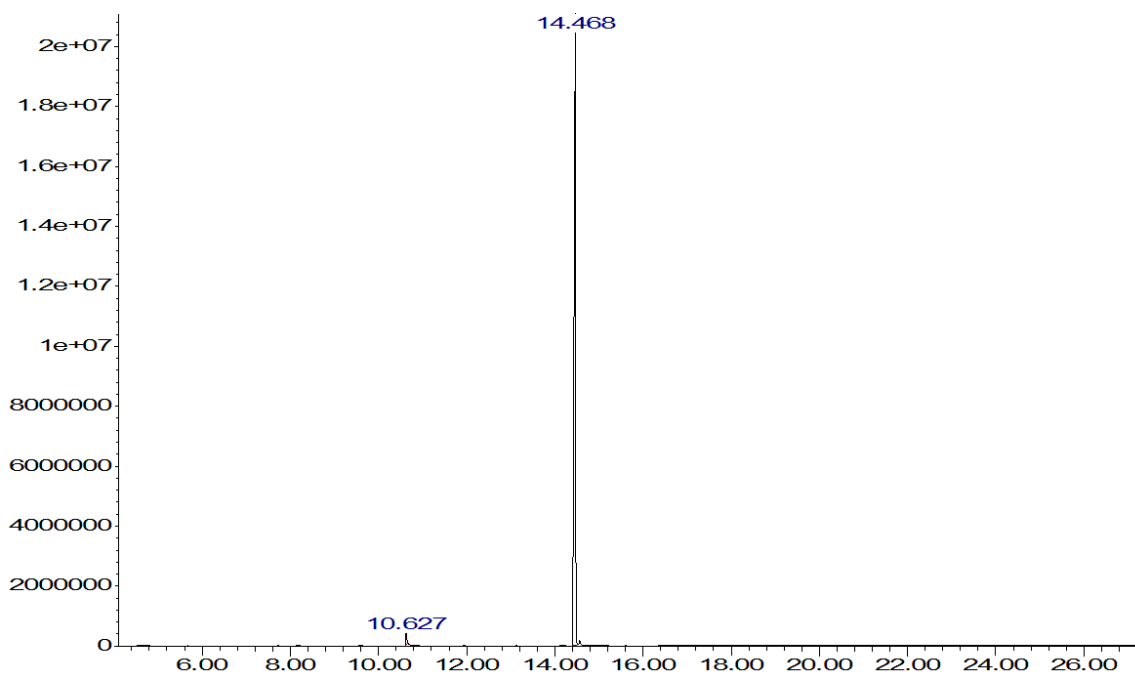

Figure 17. Compound **11g**. Purity was equal 98.9%.

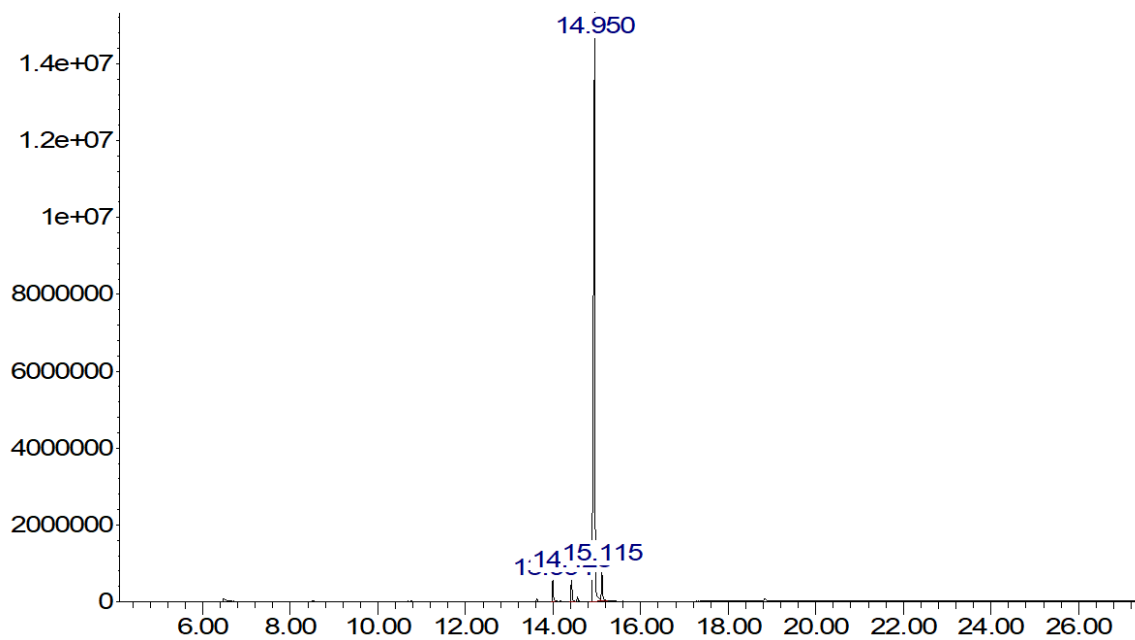

Figure 18. Compound **12g**. Purity was equal 95.1%.

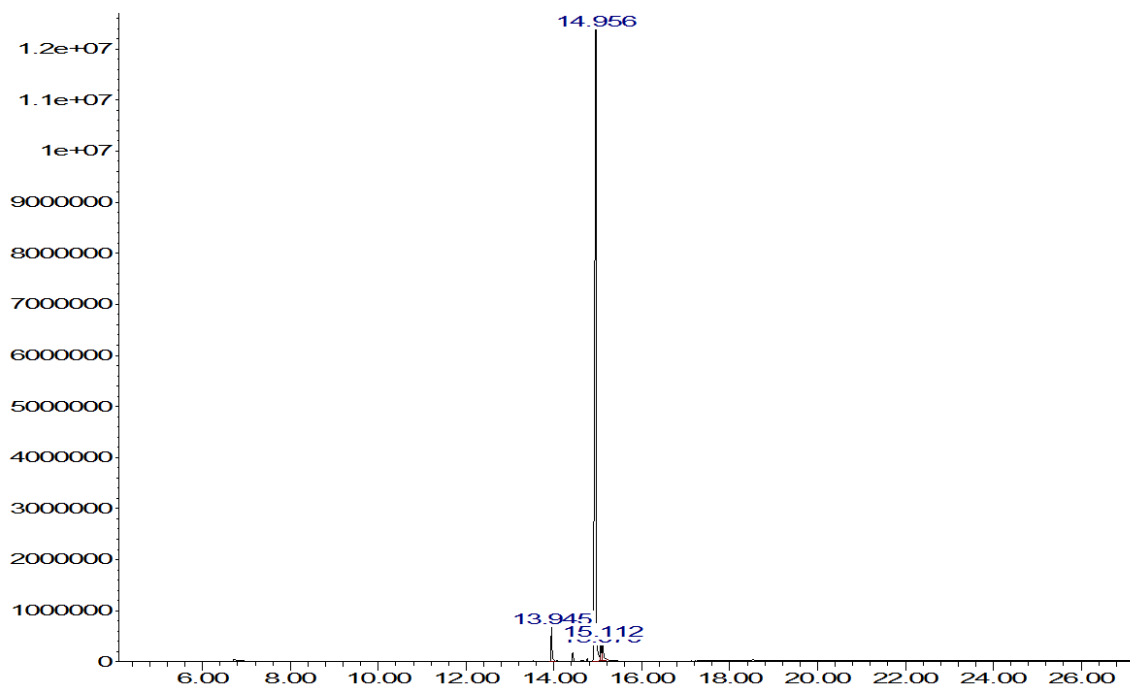

Figure 19. Compound **12h**. Purity was equal 96.8%.

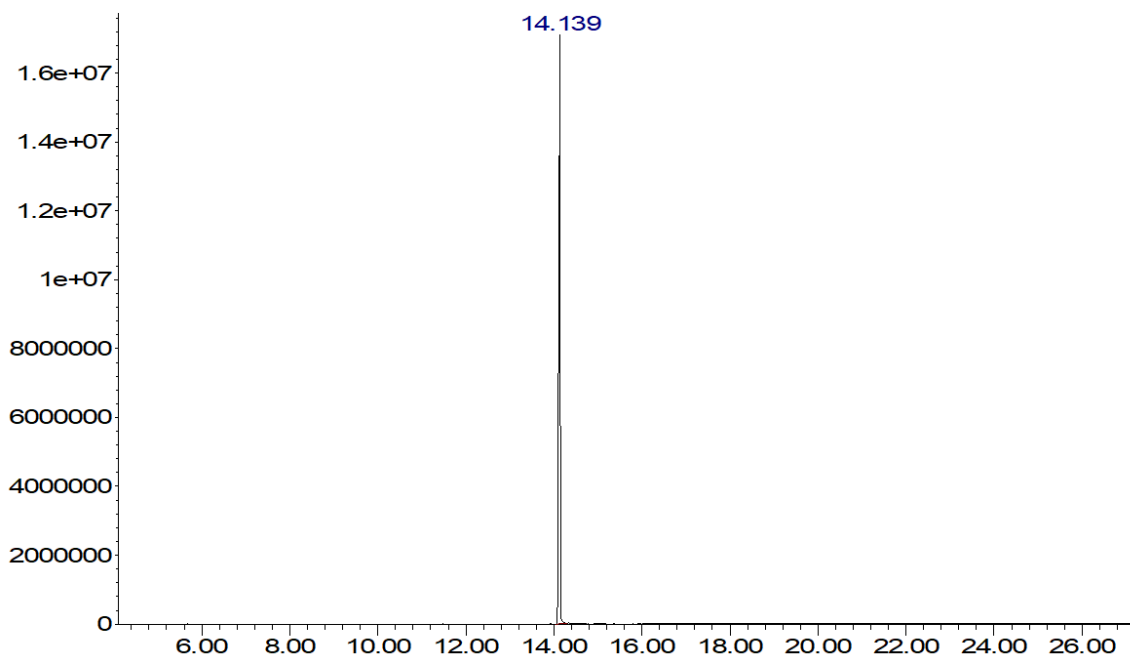

Figure 20. Compound **13g**. Purity was equal 100.0%.

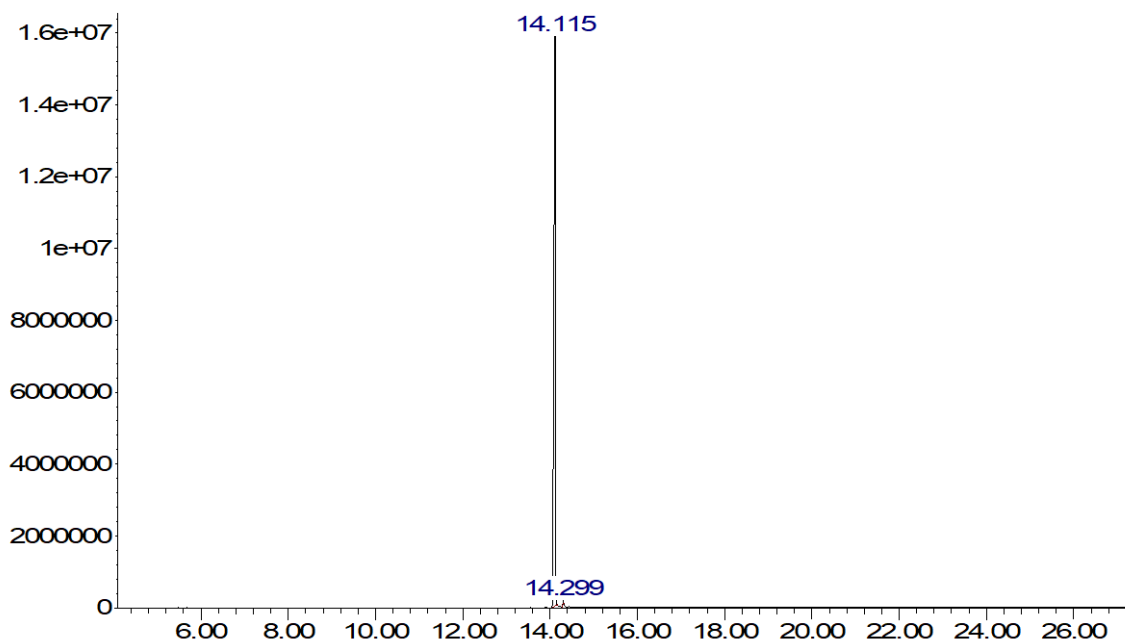

Figure 21. Compound **13h**. Purity was equal 99.7%.

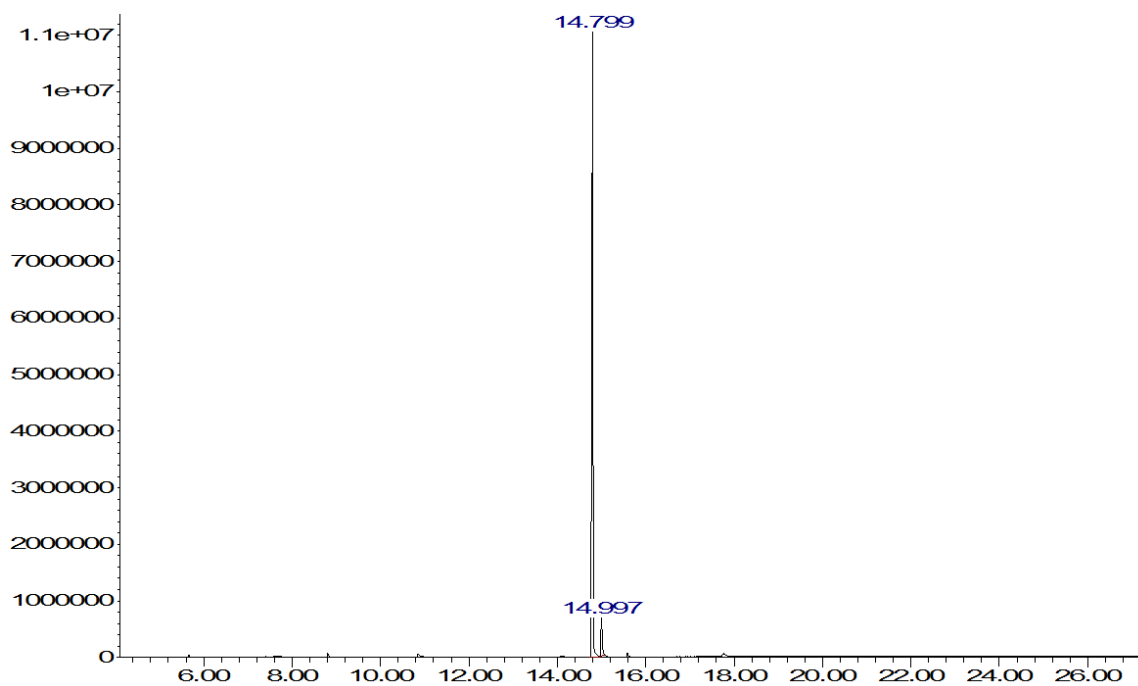

Figure 22. Compound **15f**. Purity was equal 95.9%.

$^1\text{H}$  and  $^{13}\text{C}$  NMR spectra of compounds **11d**, **12c**, **13b**.

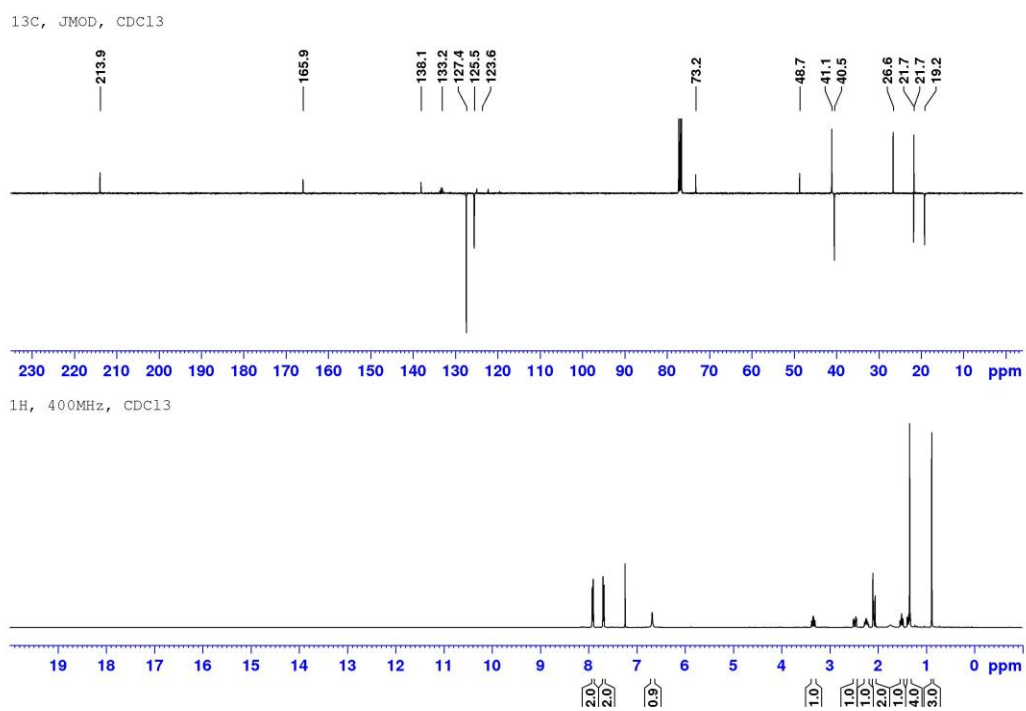

Figure 23.  $^1\text{H}$  and  $^{13}\text{C}$  NMR spectra of compound **11d**.

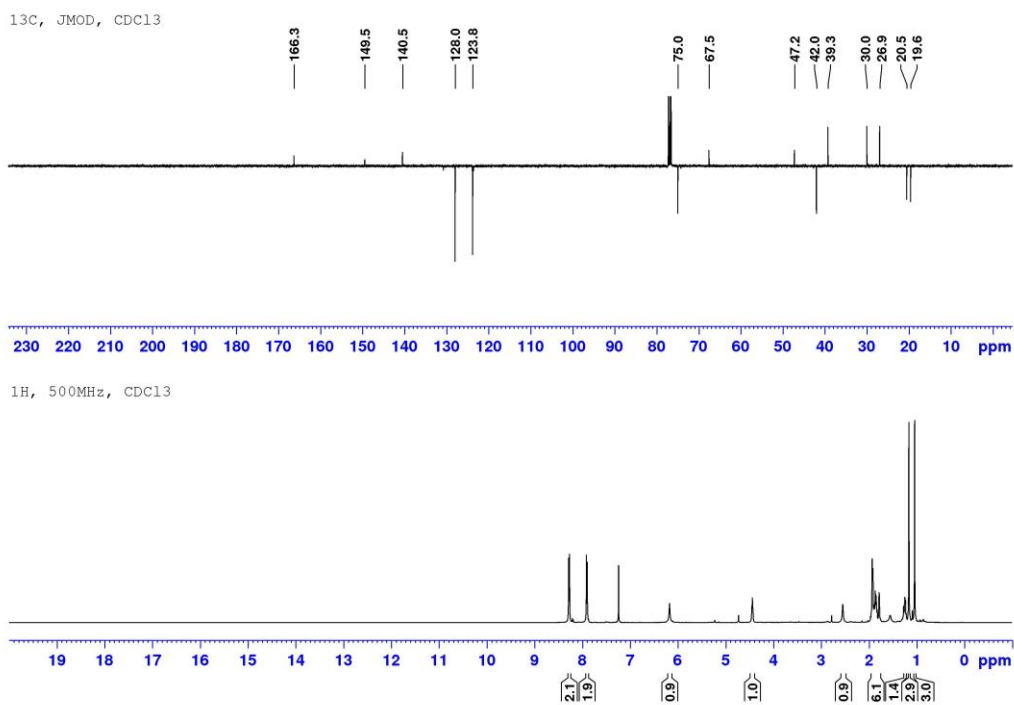

Figure 24.  $^1\text{H}$  and  $^{13}\text{C}$  NMR spectra of compound **12c**.

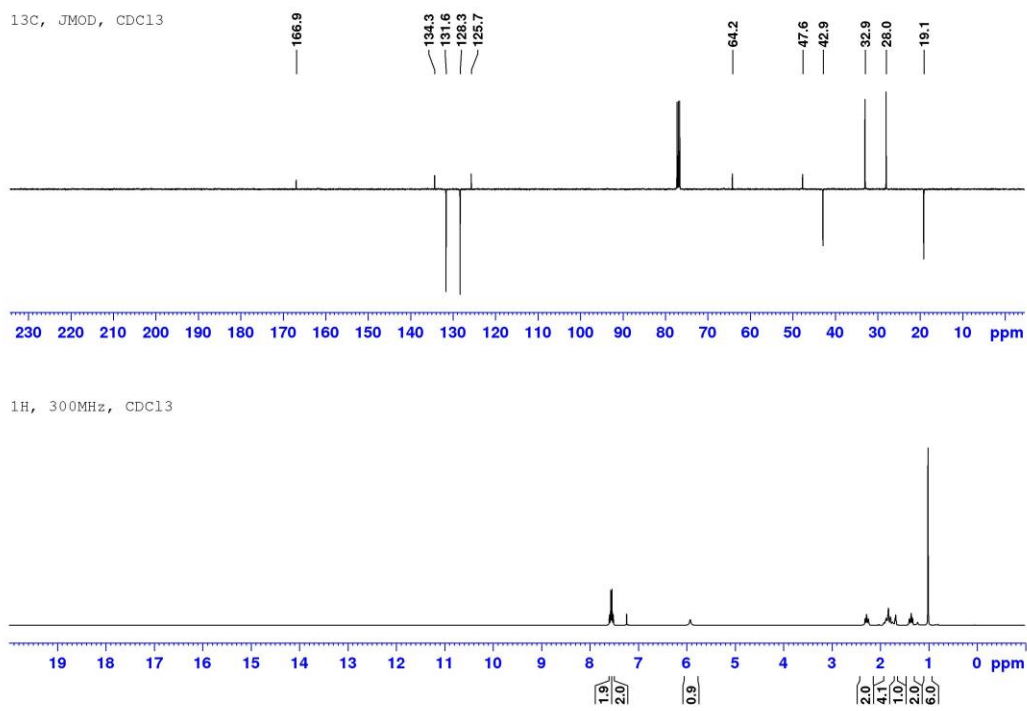

Figure 25. <sup>1</sup>H and <sup>13</sup>C NMR spectra of compound **13b**.
